# Supplementary material for: Theoretical study of NiI–NiIII cycle mediated by heterogeneous zinc in C–N cross-coupling reaction
Source: Royal Society of Chemistry journal article supplement (doi:10.1039/d2cp00105e), 2022-01-01
Supplement: d2cp00105e1.pdf [file d2cp00105e1.pdf]

**Electronic Supplementary Information**

**Theoretical Study of Ni<sup>I</sup>–Ni<sup>III</sup> Cycle Mediated by Heterogeneous  
Zinc in C–N Cross-Coupling Reaction**

Lin-Yan Bao,<sup>a</sup> Rong-Wan Gao,<sup>a</sup> Shuang Wang,<sup>a</sup> Run-Han Li,<sup>a</sup> Bo Zhu,<sup>a</sup> Zhong-Min  
Su,<sup>b</sup> and Wei Guan\*<sup>a</sup>

*<sup>a</sup>Faculty of Chemistry, Institute of Functional Material Chemistry, Northeast Normal  
University, Changchun 130024, P. R. China*

*<sup>b</sup>College of Chemistry, Jilin University, Changchun 130012, P. R. China*

*E-mail: guanw580@nenu.edu.cn*

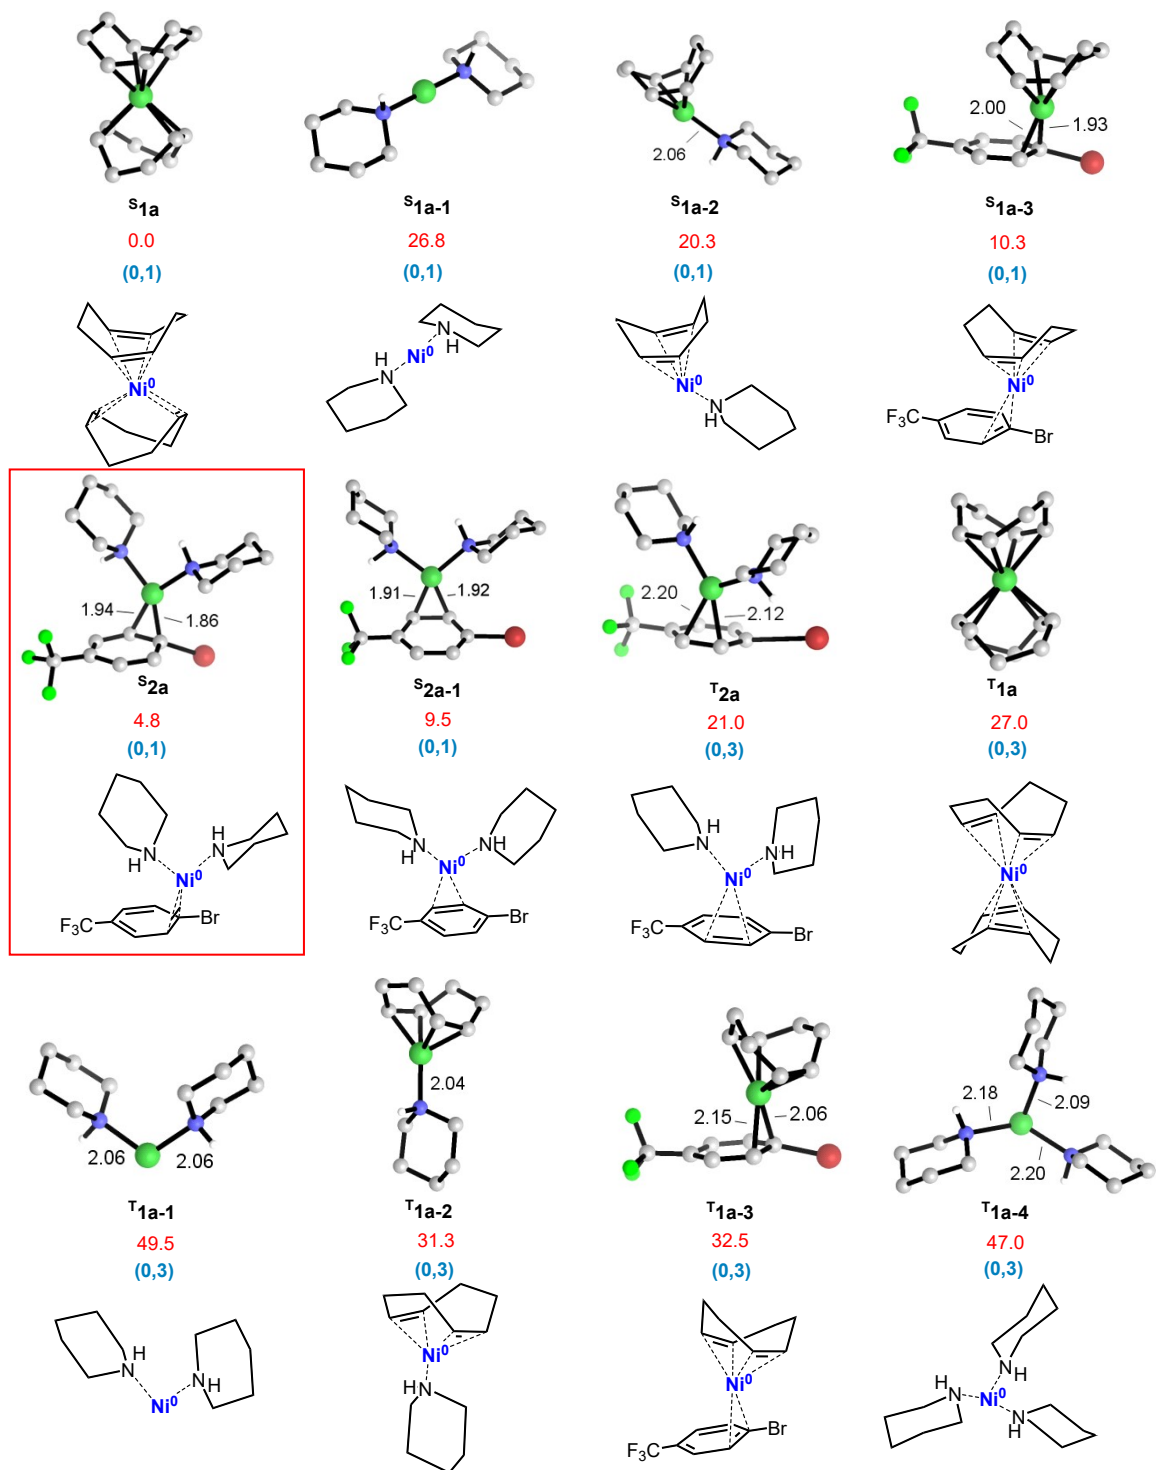

**Fig. S1** Relative stability of Ni(0) complexes. The Gibbs free energies are given in kcal/mol. The blue values in parentheses represent the charge and spin multiplicity, respectively.

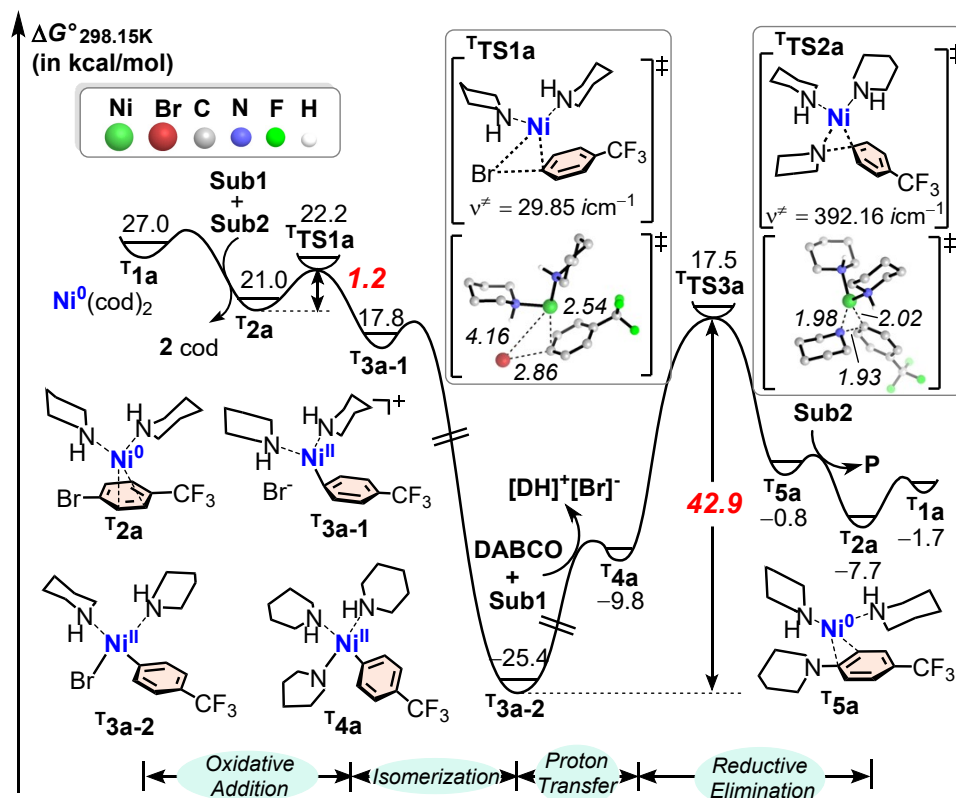

**Fig. S2** Triplet Gibbs energy profiles ( $\Delta G^{\circ}_{298.15}$ ) for  $\text{Ni}^0$ - $\text{Ni}^{\text{II}}$ - $\text{Ni}^0$  catalytic cycle in the C-N cross-coupling reaction. The relative Gibbs free energies are given in kcal/mol. The bond distances are given in angstroms.

**Table S1** Gibbs activation energies (kcal/mol) of the key transition states of the  $\text{Ni}^0$  process calculated at the level of SMD(DMA)/(U)M06/[6-311++G(d,p)/SDD(Ni,Zn)].

|  | $\Delta G^{\circ\dagger}_{\text{singlet}}$ |                   |                   | $\Delta G^{\circ\dagger}_{\text{triplet}}$ |                   |
|--|--------------------------------------------|-------------------|-------------------|--------------------------------------------|-------------------|
|  | <sup>s</sup> TS1a                          | <sup>s</sup> TS2a | <sup>s</sup> TS3a | <sup>t</sup> TS1a                          | <sup>t</sup> TS3a |
|  | 16.6                                       | 22.3              | 29.8              | 1.2                                        | 42.9              |

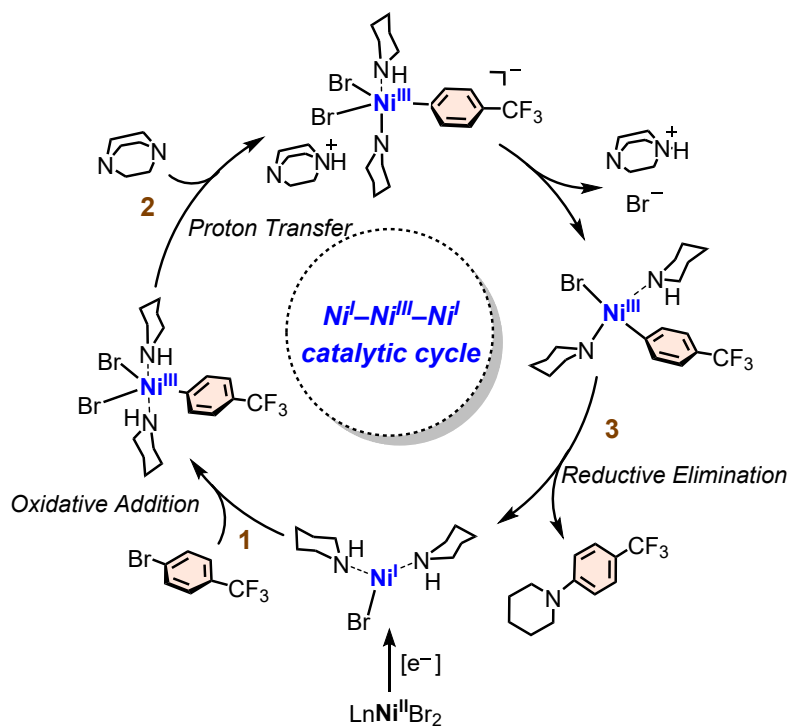

**Fig. S3** The proposed Ni<sup>I</sup>-Ni<sup>III</sup>-Ni<sup>I</sup> catalytic cycle process.

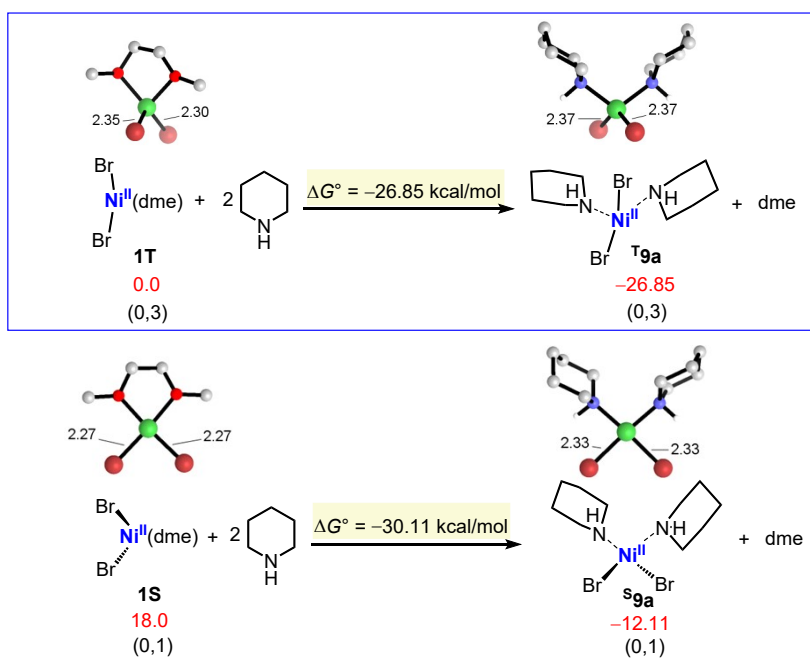

**Fig. S4** Relative stability of Ni(II) complexes. The Gibbs free energies are given in kcal/mol.

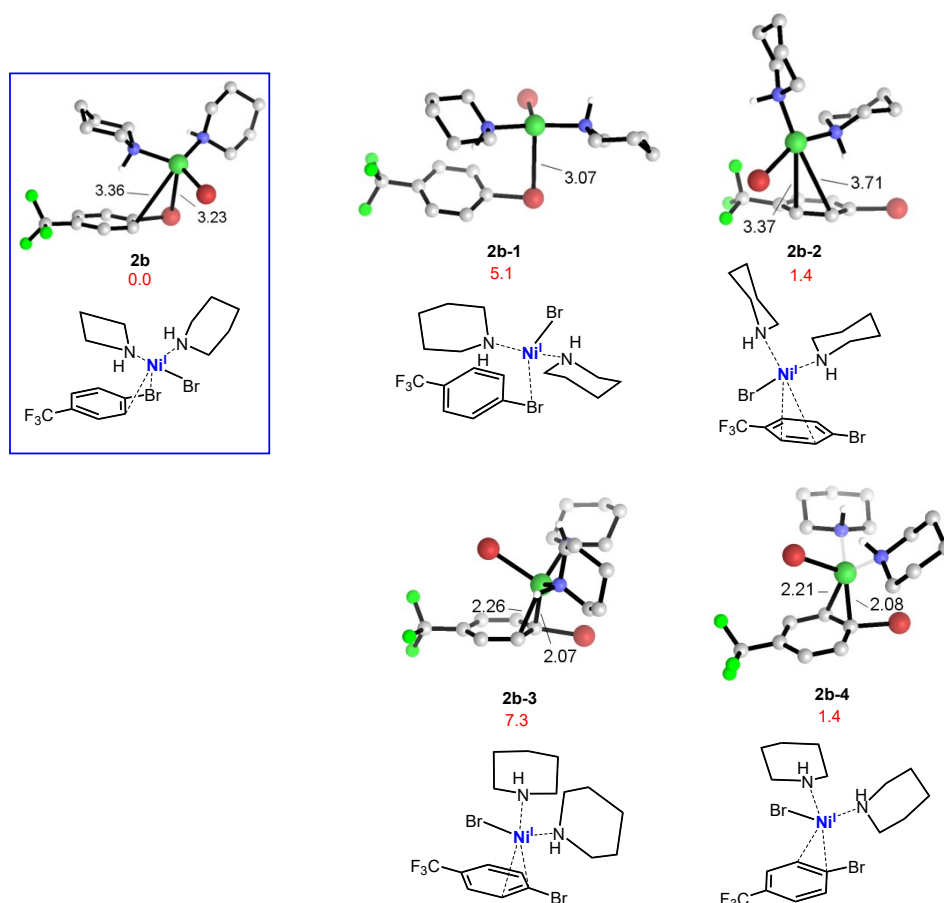

**Fig. S5** Relative stability of Ni(I) complexes. The Gibbs free energies are given in kcal/mol. Selected bond lengths are given in angstroms.

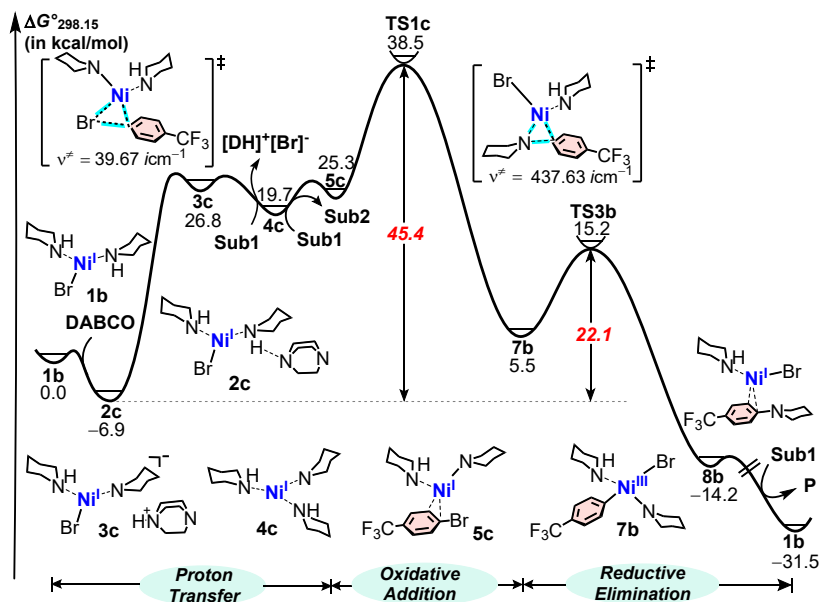

**Fig. S6** Gibbs energy profiles ( $\Delta G^{\circ}_{298.15}$ ) for alternative Ni<sup>I</sup>–Ni<sup>III</sup>–Ni<sup>I</sup> catalytic cycle in the C–N cross-coupling reaction. The relative Gibbs free energies are given in kcal/mol. The bond distances are given in angstroms.

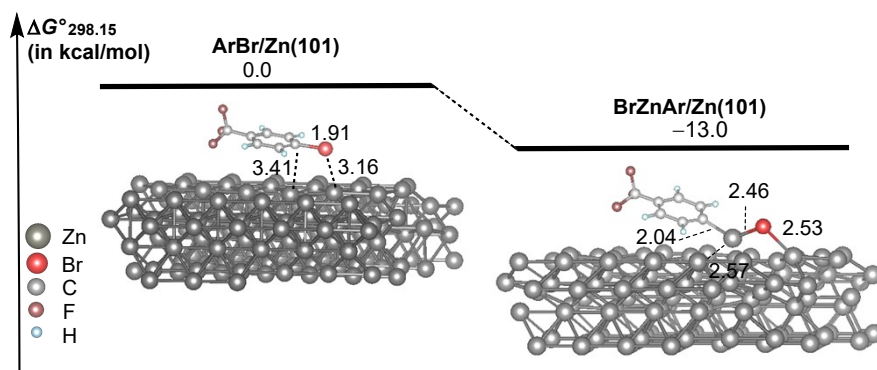

**Fig. S7** Thermodynamic evaluation of the formation of organozinc BrZnAr.

### Cartesian Coordinates of Optimized Structures

#### 1T

Gibbs free energy before correction = -5621.12693100

Gibbs free energy after correction = -5621.11314089

|    |             |             |             |
|----|-------------|-------------|-------------|
| Ni | 0.20662800  | -0.13246100 | 0.27563300  |
| Br | -0.51307400 | 2.01268400  | -0.34126000 |
| C  | -0.33190300 | -0.92670800 | -2.52675900 |
| H  | 0.73192400  | -0.68312800 | -2.60035000 |
| H  | -0.57030400 | -1.76949000 | -3.18775700 |
| C  | -2.41230300 | 0.09833100  | 1.86698500  |
| H  | -3.03931200 | -0.43846800 | 2.58983100  |
| H  | -3.03985000 | 0.53662500  | 1.08059400  |
| O  | -1.45201900 | -0.80950100 | 1.32143700  |
| O  | -0.57974900 | -1.30774300 | -1.17266100 |
| C  | -1.96310700 | -1.56003300 | -0.89667800 |
| H  | -2.30957000 | -2.40513400 | -1.50732700 |
| H  | -2.55594600 | -0.66665100 | -1.15064100 |
| C  | -2.03416600 | -1.88679400 | 0.56699800  |
| H  | -1.44177000 | -2.78223700 | 0.79155600  |
| H  | -3.06871600 | -2.05610600 | 0.88856600  |
| H  | -0.93408300 | -0.05015900 | -2.79986900 |
| H  | -1.85789300 | 0.88828900  | 2.37935800  |
| Br | 2.48458700  | -0.42055500 | 0.35682700  |

#### 1S

Gibbs free energy before correction = -5621.11062500

Gibbs free energy after correction = -5621.09683489

|    |             |             |             |
|----|-------------|-------------|-------------|
| Ni | 0.00000000  | 0.00000000  | 0.11473900  |
| Br | 0.75765900  | 1.41360500  | -1.48805700 |
| C  | -0.75417200 | -2.57787900 | 1.55813800  |
| H  | -1.35471800 | -2.82610400 | 0.68348700  |
| H  | 0.24263200  | -3.03146900 | 1.46939900  |

|    |             |             |             |
|----|-------------|-------------|-------------|
| C  | 0.75417200  | 2.57787900  | 1.55813800  |
| H  | 1.24940900  | 2.93003100  | 2.47140700  |
| H  | -0.24263200 | 3.03146900  | 1.46939900  |
| O  | 0.64504800  | 1.15148100  | 1.62005500  |
| O  | -0.64504800 | -1.15148100 | 1.62005500  |
| C  | 0.00000000  | -0.74500000 | 2.83212900  |
| H  | 1.02406400  | -1.14933900 | 2.85578000  |
| H  | -0.55921900 | -1.13398700 | 3.69352300  |
| C  | 0.00000000  | 0.74500000  | 2.83212900  |
| H  | 0.55921900  | 1.13398700  | 3.69352300  |
| H  | -1.02406400 | 1.14933900  | 2.85578000  |
| H  | -1.24940900 | -2.93003100 | 2.47140700  |
| H  | 1.35471800  | 2.82610400  | 0.68348700  |
| Br | -0.75765900 | -1.41360500 | -1.48805700 |

### S1a

Gibbs free energy before correction = -792.64379500

Gibbs free energy after correction = -792.63000471

|   |             |             |             |
|---|-------------|-------------|-------------|
| C | -1.34926300 | -1.62997600 | -0.20237700 |
| C | -1.50745700 | -0.82527300 | -1.31232200 |
| C | -1.50755300 | 0.82530900  | 1.31241600  |
| C | -2.59153600 | 0.21032500  | -1.51377800 |
| C | -1.34970000 | 1.62995700  | 0.20243200  |
| C | -2.16892900 | 1.61230900  | -1.06161800 |
| H | -0.72854200 | -2.52088200 | -0.33056400 |
| H | -2.85676400 | 0.24892300  | -2.57963400 |
| H | -0.72883100 | 2.52076800  | 0.33037800  |
| H | -0.97709900 | -1.13576500 | -2.21549400 |
| H | -0.97651400 | 1.13559800  | 2.21526700  |
| H | -3.50904500 | -0.09990700 | -0.99596900 |
| H | -1.55818700 | 2.06901700  | -1.85714800 |
| H | -3.05772200 | 2.26179700  | -0.96340100 |
| C | -2.16832700 | -1.61244400 | 1.06179500  |
| H | -1.55743900 | -2.06901700 | 1.85730000  |
| H | -3.05702400 | -2.26209300 | 0.96378400  |
| C | -2.59126400 | -0.21053900 | 1.51398400  |
| H | -3.50888800 | 0.09943600  | 0.99623100  |
| H | -2.85643500 | -0.24927400 | 2.57985300  |
| C | 1.50774400  | -1.31213300 | 0.82569700  |
| C | 1.34991900  | -0.20188600 | 1.62987600  |
| C | 1.34909500  | 0.20168400  | -1.62976600 |
| C | 2.16880800  | 1.06234100  | 1.61173200  |
| C | 1.50728600  | 1.31229200  | -0.82589800 |
| C | 2.59124400  | 1.51429600  | 0.20960700  |

|    |            |             |             |
|----|------------|-------------|-------------|
| H  | 0.97675600 | -2.21491600 | 1.13623000  |
| H  | 1.55776500 | 1.85782800  | 2.06810400  |
| H  | 0.97636600 | 2.21495900  | -1.13691700 |
| H  | 0.72915100 | -0.32959300 | 2.52082400  |
| H  | 0.72856200 | 0.32959900  | -2.52085600 |
| H  | 3.05768400 | 0.96473600  | 2.26116800  |
| H  | 2.85635400 | 2.58019200  | 0.24802900  |
| H  | 3.50890300 | 0.99659300  | -0.10044000 |
| C  | 2.59154300 | -1.51386900 | -0.21004400 |
| H  | 2.85699200 | -2.57969100 | -0.24831300 |
| H  | 3.50907200 | -0.99583100 | 0.09971700  |
| C  | 2.16841400 | -1.06230100 | -1.61201400 |
| H  | 3.05693900 | -0.96434000 | -2.26187700 |
| H  | 1.55751200 | -1.85805900 | -2.06811800 |
| Ni | 0.00001000 | -0.00002200 | 0.00012600  |

### S1a-1

Gibbs free energy before correction = -672.50176200

Gibbs free energy after correction = -672.48797185

|    |             |             |             |
|----|-------------|-------------|-------------|
| Ni | 0.00001300  | 0.00036300  | -0.45912200 |
| C  | -2.49519300 | 1.21748300  | 0.20300200  |
| C  | -4.01372400 | 1.25548900  | 0.12920200  |
| C  | -4.61684900 | -0.00689900 | 0.73187200  |
| C  | -4.02857800 | -1.23997700 | 0.05790600  |
| C  | -2.50967000 | -1.22442000 | 0.13286500  |
| H  | -4.38197500 | 2.15530100  | 0.64172400  |
| H  | -2.16098100 | 1.20677300  | 1.25132600  |
| H  | -2.04422700 | 2.09633900  | -0.27453900 |
| H  | -4.38730300 | -0.03887400 | 1.81044200  |
| H  | -5.71199400 | 0.00224700  | 0.64150500  |
| H  | -4.40785100 | -2.16307500 | 0.51838700  |
| H  | -4.33500100 | -1.26238800 | -1.00141900 |
| H  | -2.17530500 | -1.27802500 | 1.17981100  |
| H  | -2.06912600 | -2.07958600 | -0.39471000 |
| H  | -4.31956400 | 1.34217000  | -0.92700700 |
| N  | -1.92378400 | 0.01068600  | -0.44517200 |
| H  | -2.21119500 | 0.04059300  | -1.42981100 |
| C  | 2.49468700  | -1.21740900 | 0.20252700  |
| C  | 4.01321300  | -1.25600700 | 0.12898600  |
| C  | 4.61673700  | 0.00600400  | 0.73205900  |
| C  | 4.02908800  | 1.23948100  | 0.05827300  |
| C  | 2.51016900  | 1.22453300  | 0.13299100  |
| H  | 4.38102400  | -2.15607400 | 0.64137700  |
| H  | 2.16030500  | -1.20686200 | 1.25079600  |



|   |            |             |             |
|---|------------|-------------|-------------|
| H | 2.04343300 | -2.09593200 | -0.27535600 |
| H | 4.38699700 | 0.03782400  | 1.81059300  |
| H | 5.71189500 | -0.00356200 | 0.64190200  |
| H | 4.40868500 | 2.16232000  | 0.51900500  |
| H | 4.33569300 | 1.26199100  | -1.00099800 |
| H | 2.17566300 | 1.27806700  | 1.17989700  |
| H | 2.07005100 | 2.07999800  | -0.39446100 |
| H | 4.31923000 | -1.34255700 | -0.92718200 |
| N | 1.92386500 | -0.01019200 | -0.44539400 |
| H | 2.21134300 | -0.03998800 | -1.43000900 |

### S1a-2

Gibbs free energy before correction = -732.56410600

Gibbs free energy after correction = -732.55031557

|    |             |             |             |
|----|-------------|-------------|-------------|
| C  | 1.20969800  | 1.59455300  | 0.45048900  |
| C  | 2.10843900  | 1.31769400  | -0.58688200 |
| C  | 1.29016700  | -1.35262400 | 0.71609000  |
| C  | 3.42302200  | 0.58010700  | -0.43311300 |
| C  | 1.97711000  | -1.51183300 | -0.48136400 |
| C  | 3.30382700  | -0.89321400 | -0.84760800 |
| H  | 0.54913700  | 2.46393900  | 0.36577800  |
| H  | 4.19795200  | 1.06276100  | -1.04778700 |
| H  | 1.66099600  | -2.34560900 | -1.11831100 |
| H  | 2.02506800  | 1.94715600  | -1.48153200 |
| H  | 0.49820800  | -2.07423500 | 0.93863400  |
| H  | 3.78373800  | 0.65947100  | 0.60194200  |
| H  | 3.40789800  | -0.95975200 | -1.94188000 |
| H  | 4.15173400  | -1.47252600 | -0.43626400 |
| C  | 1.30173000  | 0.98632500  | 1.83271300  |
| H  | 0.30291600  | 1.06446300  | 2.29319300  |
| H  | 1.97129300  | 1.56883700  | 2.49185300  |
| C  | 1.75562200  | -0.49997400 | 1.88124600  |
| H  | 2.85103300  | -0.54744100 | 1.95578000  |
| H  | 1.37867400  | -0.93460100 | 2.81797600  |
| Ni | 0.53753700  | 0.01916100  | -0.57700200 |
| C  | -2.19147900 | 1.19125700  | -0.26114500 |
| C  | -3.70247800 | 1.12644700  | -0.42473600 |
| C  | -4.28865800 | -0.00155800 | 0.41424400  |
| C  | -3.59930100 | -1.31637200 | 0.07332400  |
| C  | -2.09081100 | -1.19178400 | 0.22360600  |
| H  | -4.14289000 | 2.09567400  | -0.15082700 |
| H  | -1.93384200 | 1.44599800  | 0.77979000  |
| H  | -1.75277200 | 1.96571400  | -0.90328100 |
| H  | -4.13405600 | 0.22295200  | 1.48328300  |

|   |             |             |             |
|---|-------------|-------------|-------------|
| H | -5.37393100 | -0.07878800 | 0.26085500  |
| H | -3.96536200 | -2.13386300 | 0.71064400  |
| H | -3.83232000 | -1.59487700 | -0.96841000 |
| H | -1.82778200 | -0.99944500 | 1.27703600  |
| H | -1.58386900 | -2.11900900 | -0.07408600 |
| H | -3.94067800 | 0.95662600  | -1.48841700 |
| N | -1.51674700 | -0.08694800 | -0.57064200 |
| H | -1.70627800 | -0.29546000 | -1.55661900 |

### S1a-3

Gibbs free energy before correction = -3620.89986800

Gibbs free energy after correction = -3620.88607762

|    |             |             |             |
|----|-------------|-------------|-------------|
| C  | -2.02901100 | 1.67072800  | -1.35885700 |
| C  | -0.71999800 | 2.07894800  | -1.29334300 |
| C  | -2.14607200 | 0.70669000  | 1.39604400  |
| C  | -0.09271900 | 2.95950400  | -0.24748900 |
| C  | -0.96244300 | 1.38094800  | 1.55182800  |
| C  | -0.68697500 | 2.81289000  | 1.16541000  |
| H  | -2.31699500 | 1.08917600  | -2.24023000 |
| H  | 0.97850100  | 2.70356300  | -0.20758100 |
| H  | -0.18890300 | 0.88974500  | 2.14858900  |
| H  | -0.07789200 | 1.83936200  | -2.14436700 |
| H  | -2.23753000 | -0.25429800 | 1.90968600  |
| H  | -0.13323600 | 4.01843900  | -0.55335400 |
| H  | 0.02915300  | 3.23807300  | 1.88120000  |
| H  | -1.59930100 | 3.41327000  | 1.26310300  |
| C  | -3.16099500 | 2.12989400  | -0.47273100 |
| H  | -4.08324200 | 2.16430600  | -1.06836400 |
| H  | -2.98401600 | 3.15984300  | -0.14050700 |
| C  | -3.40047800 | 1.20534900  | 0.73209300  |
| H  | -4.05493800 | 1.71193900  | 1.46126400  |
| H  | -3.96318900 | 0.32234700  | 0.39233100  |
| Ni | -0.87724300 | 0.23746400  | -0.26694100 |
| C  | 0.37780400  | -0.98330300 | -1.22607400 |
| C  | -0.11895300 | -1.51935500 | 0.01333000  |
| C  | 0.73327100  | -1.68693500 | 1.14332400  |
| C  | 1.98856300  | -1.14543000 | 1.11596100  |
| C  | 2.45676000  | -0.48948200 | -0.05820000 |
| C  | 1.69217200  | -0.43901900 | -1.19904900 |
| H  | -0.08036300 | -1.22762200 | -2.18537700 |
| H  | 0.36357000  | -2.20076100 | 2.02970400  |
| H  | 2.63475500  | -1.21489500 | 1.98958300  |
| H  | 2.09564400  | 0.00068400  | -2.11014600 |
| Br | -1.72622800 | -2.59378900 | -0.09763700 |

|   |            |             |             |
|---|------------|-------------|-------------|
| C | 3.78222900 | 0.18133200  | -0.00217200 |
| F | 3.72883600 | 1.32495900  | 0.71365600  |
| F | 4.25897800 | 0.51139900  | -1.20882700 |
| F | 4.71438900 | -0.58037000 | 0.59580000  |

**S2a**

Gibbs free energy before correction = -3812.43212200

Gibbs free energy after correction = -3812.41833181

|    |             |             |             |
|----|-------------|-------------|-------------|
| Ni | 0.36740900  | 0.11564700  | -0.45861200 |
| C  | -1.03101400 | -0.84729900 | -1.40203800 |
| C  | -0.21343800 | -1.65121200 | -0.49263300 |
| C  | -0.81408000 | -2.12766300 | 0.72613700  |
| C  | -2.06458700 | -1.72162400 | 1.09240400  |
| C  | -2.85066300 | -0.90545400 | 0.21845500  |
| C  | -2.35893000 | -0.51754100 | -1.00169800 |
| H  | -0.80315400 | -0.82562700 | -2.47120600 |
| H  | -0.24812700 | -2.80064800 | 1.37068100  |
| H  | -2.48364100 | -2.04018600 | 2.04692600  |
| H  | -2.99051300 | 0.04421600  | -1.69033900 |
| C  | -4.18055200 | -0.45941400 | 0.69145200  |
| F  | -4.92602000 | 0.10452800  | -0.26926800 |
| F  | -4.08681800 | 0.45609600  | 1.68435200  |
| F  | -4.90932300 | -1.46889900 | 1.20768000  |
| C  | 3.25216700  | 0.01150800  | -0.18041900 |
| C  | 4.54765100  | 0.20697100  | 0.59099800  |
| C  | 4.56685200  | -0.66483700 | 1.84098500  |
| C  | 3.32705900  | -0.40213500 | 2.68743600  |
| C  | 2.06451400  | -0.58217100 | 1.85928400  |
| H  | 5.40273000  | -0.01865000 | -0.06180100 |
| H  | 3.16694600  | -1.02325200 | -0.54554700 |
| H  | 3.20386600  | 0.67189400  | -1.05689300 |
| H  | 4.57993100  | -1.72618700 | 1.53995500  |
| H  | 5.48137000  | -0.48927100 | 2.42435800  |
| H  | 3.29407400  | -1.07073500 | 3.55915700  |
| H  | 3.35770400  | 0.62923900  | 3.07750600  |
| H  | 1.97642100  | -1.62446400 | 1.51583800  |
| H  | 1.16159600  | -0.35121300 | 2.44098900  |
| H  | 4.63621500  | 1.26886800  | 0.87834100  |
| N  | 2.05436400  | 0.26496200  | 0.64985700  |
| H  | 2.10883900  | 1.23686900  | 0.97001800  |
| C  | 1.20731500  | 2.93552100  | -1.19565400 |
| C  | 0.83742000  | 4.39532800  | -1.40936400 |
| C  | 0.17578600  | 4.97114300  | -0.16343600 |
| C  | -1.02067300 | 4.11808700  | 0.23892400  |

|    |             |             |             |
|----|-------------|-------------|-------------|
| C  | -0.61187100 | 2.66326900  | 0.41069100  |
| H  | 1.73632200  | 4.96626900  | -1.68112000 |
| H  | 1.96964200  | 2.85783800  | -0.40335400 |
| H  | 1.63471100  | 2.49193700  | -2.10444700 |
| H  | 0.90709500  | 4.98343300  | 0.66253800  |
| H  | -0.12885000 | 6.01329700  | -0.33163100 |
| H  | -1.47400600 | 4.48407300  | 1.17084100  |
| H  | -1.79817500 | 4.18116400  | -0.54091600 |
| H  | 0.09488300  | 2.56257400  | 1.25061700  |
| H  | -1.48084500 | 2.02880700  | 0.63683500  |
| H  | 0.14288500  | 4.46731700  | -2.26308900 |
| N  | 0.05491200  | 2.10826900  | -0.78706500 |
| H  | -0.62502600 | 2.13926700  | -1.55147100 |
| Br | 1.09789800  | -2.89337000 | -1.30614900 |

**S2a-1**

Gibbs free energy before correction = -3812.42479900

Gibbs free energy after correction = -3812.41100881

|    |             |             |             |
|----|-------------|-------------|-------------|
| Ni | -0.19506700 | 0.23867700  | -0.54604500 |
| C  | 0.80131700  | -1.30628100 | -1.10947600 |
| C  | 1.60082600  | -1.85225700 | -0.06124200 |
| C  | 1.10768800  | -2.52454900 | 1.02091300  |
| C  | -0.29678100 | -2.75787500 | 1.08946700  |
| C  | -1.12358700 | -2.32045800 | 0.09080300  |
| C  | -0.64336100 | -1.55075100 | -1.03881500 |
| H  | 1.28551700  | -1.13249300 | -2.07533700 |
| H  | 1.76579900  | -2.89733100 | 1.80216200  |
| H  | -0.69769800 | -3.30927400 | 1.93745400  |
| H  | -1.22676400 | -1.61754500 | -1.96432200 |
| C  | -2.57967900 | -2.60915100 | 0.14022200  |
| F  | -3.01702700 | -3.20670000 | -0.98437600 |
| F  | -3.32321000 | -1.47876600 | 0.25516800  |
| F  | -2.94034700 | -3.39505100 | 1.16149700  |
| C  | 2.06950700  | 2.04959900  | -1.04347300 |
| C  | 2.99337800  | 3.19190400  | -0.65104100 |
| C  | 3.66657900  | 2.90139400  | 0.68525400  |
| C  | 2.61841200  | 2.59973300  | 1.74997200  |
| C  | 1.70565900  | 1.47080000  | 1.29594300  |
| H  | 3.73855400  | 3.35199100  | -1.44306200 |
| H  | 2.64890700  | 1.12593100  | -1.19803300 |
| H  | 1.53415900  | 2.26424600  | -1.97881800 |
| H  | 4.33035900  | 2.02682800  | 0.57387700  |
| H  | 4.30224600  | 3.74361600  | 0.99193400  |
| H  | 3.09113900  | 2.32882200  | 2.70462200  |

|    |             |             |             |
|----|-------------|-------------|-------------|
| H  | 2.01202000  | 3.50193900  | 1.93811500  |
| H  | 2.28448300  | 0.54274300  | 1.17552400  |
| H  | 0.91378200  | 1.27021300  | 2.03116200  |
| H  | 2.40483400  | 4.12172400  | -0.57350000 |
| N  | 1.06109500  | 1.74799000  | -0.00554300 |
| H  | 0.49706600  | 2.59405300  | 0.11901000  |
| C  | -2.19121900 | 2.31416600  | -1.21846500 |
| C  | -3.58343600 | 2.91433800  | -1.08746100 |
| C  | -3.86970600 | 3.31020100  | 0.35632400  |
| C  | -3.64495200 | 2.12449700  | 1.28751900  |
| C  | -2.24765200 | 1.55444100  | 1.09844100  |
| H  | -3.67878000 | 3.77754500  | -1.76104500 |
| H  | -1.42790400 | 3.07445700  | -0.98725300 |
| H  | -2.00105100 | 1.96204600  | -2.24108800 |
| H  | -3.19307400 | 4.13138700  | 0.64796100  |
| H  | -4.89395600 | 3.69509900  | 0.45666800  |
| H  | -3.79002500 | 2.41230400  | 2.33832300  |
| H  | -4.38207500 | 1.33320600  | 1.06730600  |
| H  | -1.49082600 | 2.30186600  | 1.38649700  |
| H  | -2.08557900 | 0.66595900  | 1.72484100  |
| H  | -4.32446200 | 2.16748600  | -1.41849900 |
| N  | -1.97821200 | 1.17722200  | -0.30243200 |
| H  | -2.65729800 | 0.45521600  | -0.55320300 |
| Br | 3.48998900  | -1.58243800 | -0.19360300 |

### T1a

Gibbs free energy before correction = -792.59443000

Gibbs free energy after correction = -792.58063971

|   |             |             |             |
|---|-------------|-------------|-------------|
| C | -1.45225900 | -1.10158700 | -1.19139400 |
| C | -1.65170400 | 0.21275000  | -1.56566400 |
| C | -1.65529300 | -0.21280200 | 1.56540200  |
| C | -2.72341800 | 1.13069300  | -1.03477400 |
| C | -1.45566800 | 1.10142400  | 1.19189600  |
| C | -2.27978600 | 1.90156600  | 0.21391200  |
| H | -0.80597600 | -1.70438200 | -1.83433700 |
| H | -2.99335600 | 1.85665100  | -1.81474200 |
| H | -0.81013400 | 1.70426200  | 1.83553100  |
| H | -1.09624000 | 0.56760200  | -2.43657200 |
| H | -1.10003500 | -0.56823100 | 2.43621200  |
| H | -3.64270500 | 0.56536300  | -0.83132300 |
| H | -1.67028100 | 2.76120600  | -0.10605200 |
| H | -3.16351700 | 2.33390800  | 0.72173700  |
| C | -2.27821400 | -1.90210200 | -0.21524200 |
| H | -1.66906200 | -2.76139500 | 0.10634100  |

|    |             |             |             |
|----|-------------|-------------|-------------|
| H  | -3.16050500 | -2.33495800 | -0.72511800 |
| C  | -2.72537200 | -1.13110500 | 1.03210600  |
| H  | -3.64413500 | -0.56592900 | 0.82598000  |
| H  | -2.99726500 | -1.85683200 | 1.81161100  |
| C  | 1.45260500  | -1.10169700 | 1.19166800  |
| C  | 1.65195700  | 0.21275100  | 1.56564800  |
| C  | 1.65469700  | -0.21266100 | -1.56571100 |
| C  | 2.72373600  | 1.13049000  | 1.03450500  |
| C  | 1.45508000  | 1.10147200  | -1.19155000 |
| C  | 2.27992900  | 1.90147700  | -0.21402800 |
| H  | 0.80649100  | -1.70451800 | 1.83475000  |
| H  | 2.99410100  | 1.85629900  | 1.81446800  |
| H  | 0.80966700  | 1.70453200  | -1.83511800 |
| H  | 1.09657100  | 0.56769700  | 2.43657400  |
| H  | 1.09927100  | -0.56788300 | -2.43648200 |
| H  | 3.64278900  | 0.56489500  | 0.83073800  |
| H  | 1.67085900  | 2.76135600  | 0.10611200  |
| H  | 3.16362500  | 2.33337800  | -0.72227600 |
| C  | 2.27817700  | -1.90201100 | 0.21503500  |
| H  | 1.66897400  | -2.76137900 | -0.10625000 |
| H  | 3.16077300  | -2.33483300 | 0.72443100  |
| C  | 2.72476800  | -1.13112300 | -1.03262800 |
| H  | 3.64376900  | -0.56611200 | -0.82703200 |
| H  | 2.99618300  | -1.85707300 | -1.81209500 |
| Ni | 0.00016900  | 0.00075600  | 0.00027900  |

## P

Gibbs free energy before correction = -819.33436500

Gibbs free energy after correction = -819.32057484

|   |             |             |             |
|---|-------------|-------------|-------------|
| C | -2.93880800 | -1.26447300 | -0.58804800 |
| C | -3.41730500 | -1.20345500 | 0.85764700  |
| C | -4.21520500 | 0.07541700  | 1.09934700  |
| C | -3.44133700 | 1.30978500  | 0.64200800  |
| C | -2.95809200 | 1.12279400  | -0.79119900 |
| H | -4.02371800 | -2.09021200 | 1.08969700  |
| H | -3.80375300 | -1.26369000 | -1.26868100 |
| H | -2.38405800 | -2.18239800 | -0.79870900 |
| H | -5.15925100 | 0.01721600  | 0.53134100  |
| H | -4.49126600 | 0.16362300  | 2.15920100  |
| H | -4.06716700 | 2.21044400  | 0.71270000  |
| H | -2.56944000 | 1.47135100  | 1.29688500  |
| H | -3.82363900 | 0.98520000  | -1.45726300 |
| H | -2.41749200 | 1.99545000  | -1.16960500 |
| H | -2.53707800 | -1.23149900 | 1.52139400  |

|   |             |             |             |
|---|-------------|-------------|-------------|
| N | -2.13763700 | -0.08219100 | -0.91264100 |
| C | -0.02704700 | -1.22758300 | -0.47461500 |
| C | -0.79082600 | -0.04224000 | -0.59429100 |
| C | -0.10198200 | 1.17808500  | -0.41896700 |
| C | 1.26094800  | 1.21098300  | -0.17130300 |
| C | 1.99550300  | 0.03387600  | -0.07517700 |
| C | 1.33122700  | -1.18426100 | -0.22645900 |
| H | -0.49430100 | -2.20147000 | -0.58753100 |
| H | -0.63072100 | 2.12532600  | -0.46703100 |
| H | 1.75120300  | 2.17408600  | -0.04381900 |
| H | 1.88834600  | -2.11812700 | -0.14760400 |
| C | 3.45305200  | 0.02751200  | 0.20654900  |
| F | 4.14865900  | -0.64481700 | -0.73091600 |
| F | 3.74462500  | -0.58043800 | 1.37373300  |
| F | 3.97616300  | 1.25874300  | 0.27102400  |

### T1a-1

Gibbs free energy before correction = -672.46488000

Gibbs free energy after correction = -672.45108985

|    |             |             |             |
|----|-------------|-------------|-------------|
| Ni | -0.00035900 | -1.79214000 | 0.00009200  |
| C  | -1.60911200 | 0.43900600  | -1.16526300 |
| C  | -2.91599000 | 1.19741000  | -1.33745100 |
| C  | -3.42155300 | 1.71116500  | 0.00582800  |
| C  | -3.53268700 | 0.56493200  | 1.00452400  |
| C  | -2.20873500 | -0.17318700 | 1.12195200  |
| H  | -2.77273600 | 2.02334700  | -2.04842800 |
| H  | -0.82012300 | 1.11760200  | -0.80283000 |
| H  | -1.26032000 | 0.00773500  | -2.11374100 |
| H  | -2.71406900 | 2.46253300  | 0.39564400  |
| H  | -4.38868200 | 2.21900300  | -0.11252700 |
| H  | -3.84064600 | 0.93082800  | 1.99415800  |
| H  | -4.30873000 | -0.14335900 | 0.66942400  |
| H  | -1.43487300 | 0.49603000  | 1.53006800  |
| H  | -2.28068400 | -1.03969800 | 1.79406400  |
| H  | -3.66616400 | 0.52091800  | -1.77999100 |
| N  | -1.71614200 | -0.65803700 | -0.18311800 |
| H  | -2.40417700 | -1.32845200 | -0.54189400 |
| C  | 1.60926200  | 0.43947200  | 1.16523600  |
| C  | 2.91713400  | 1.19608500  | 1.33774200  |
| C  | 3.42322900  | 1.70989800  | -0.00531400 |
| C  | 3.53289000  | 0.56402900  | -1.00458700 |
| C  | 2.20804700  | -0.17238700 | -1.12235700 |
| H  | 2.77499600  | 2.02182500  | 2.04916700  |
| H  | 0.82110600  | 1.11928800  | 0.80325800  |

|   |            |             |             |
|---|------------|-------------|-------------|
| H | 1.26003200 | 0.00802200  | 2.11346600  |
| H | 2.71662000 | 2.46232100  | -0.39467700 |
| H | 4.39099100 | 2.21649000  | 0.11318700  |
| H | 3.84127100 | 0.93003400  | -1.99404600 |
| H | 4.30804900 | -0.14539200 | -0.66984100 |
| H | 1.43501500 | 0.49788900  | -1.53030100 |
| H | 2.27893400 | -1.03875600 | -1.79479600 |
| H | 3.66646900 | 0.51839000  | 1.77986800  |
| N | 1.71482700 | -0.65718700 | 0.18246600  |
| H | 2.40206600 | -1.32865900 | 0.54089600  |

### T1a-2

Gibbs free energy before correction = -732.53929400

Gibbs free energy after correction = -732.52550357

|    |             |             |             |
|----|-------------|-------------|-------------|
| C  | 1.25492900  | 1.58131200  | 0.03262900  |
| C  | 1.53924200  | 0.96465000  | -1.20321300 |
| C  | 1.94384100  | -0.89081000 | 1.24400800  |
| C  | 2.85948000  | 0.28349900  | -1.51008500 |
| C  | 1.97895600  | -1.57628200 | 0.00464800  |
| C  | 2.86469100  | -1.21473600 | -1.16748000 |
| H  | 0.46858300  | 2.34285900  | 0.03250300  |
| H  | 3.09507200  | 0.40556900  | -2.57761200 |
| H  | 1.59984100  | -2.60462700 | 0.00806200  |
| H  | 0.92727600  | 1.26353700  | -2.05951600 |
| H  | 1.53311000  | -1.44401700 | 2.09393400  |
| H  | 3.67276500  | 0.79697800  | -0.97469500 |
| H  | 2.49982400  | -1.77419600 | -2.04169500 |
| H  | 3.90783500  | -1.55954500 | -1.00951000 |
| C  | 2.20283500  | 1.64301100  | 1.21035300  |
| H  | 1.62616900  | 1.99679100  | 2.07802900  |
| H  | 2.99674500  | 2.40228000  | 1.05221600  |
| C  | 2.83875700  | 0.29073300  | 1.56646900  |
| H  | 3.80296000  | 0.17562500  | 1.04790000  |
| H  | 3.08470600  | 0.28315000  | 2.63863200  |
| Ni | 0.38059600  | -0.30299800 | 0.02377900  |
| C  | -2.22217100 | 1.19192600  | -0.24253500 |
| C  | -3.71792900 | 1.17188700  | -0.51380100 |
| C  | -4.41237600 | 0.12977100  | 0.35528900  |
| C  | -3.76338200 | -1.23655700 | 0.16848800  |
| C  | -2.26678700 | -1.15531500 | 0.42031300  |
| H  | -4.13608100 | 2.17313000  | -0.34000300 |
| H  | -2.02119200 | 1.49969300  | 0.79655300  |
| H  | -1.70153200 | 1.89881300  | -0.90188500 |
| H  | -4.33007000 | 0.42807100  | 1.41403700  |



|   |             |             |             |
|---|-------------|-------------|-------------|
| H | -5.48506400 | 0.08362600  | 0.12229900  |
| H | -4.20893300 | -1.98307300 | 0.84047900  |
| H | -3.93329500 | -1.59060900 | -0.86197100 |
| H | -2.06563200 | -0.87802000 | 1.46880200  |
| H | -1.76816800 | -2.11785900 | 0.23317200  |
| H | -3.88505200 | 0.93653400  | -1.57835800 |
| N | -1.60131000 | -0.13453400 | -0.41992000 |
| H | -1.72788700 | -0.40754100 | -1.39823900 |

### T1a-3

Gibbs free energy before correction = -3620.85377400

Gibbs free energy after correction = -3620.83998362

|    |             |             |             |
|----|-------------|-------------|-------------|
| C  | -2.65951500 | 0.64238900  | -0.75988900 |
| C  | -1.82260900 | 1.36643100  | -1.57226300 |
| C  | -1.24772400 | 1.40527300  | 1.67150000  |
| C  | -1.47865400 | 2.82887700  | -1.46056500 |
| C  | -0.61572200 | 2.35059400  | 0.87807100  |
| C  | -1.31409800 | 3.34131100  | -0.02268700 |
| H  | -2.87488200 | -0.38732900 | -1.05660100 |
| H  | -0.53158900 | 2.98188500  | -1.99821900 |
| H  | 0.44840000  | 2.52159700  | 1.07009600  |
| H  | -1.46854700 | 0.87186800  | -2.47977600 |
| H  | -0.63907100 | 0.92439800  | 2.44453700  |
| H  | -2.22901200 | 3.43787000  | -1.99432000 |
| H  | -0.73272200 | 4.27258400  | -0.04995000 |
| H  | -2.28738600 | 3.61095900  | 0.40678300  |
| C  | -3.45944600 | 1.19598000  | 0.39330000  |
| H  | -4.39619600 | 0.62929600  | 0.47621900  |
| H  | -3.75379400 | 2.23003200  | 0.17529100  |
| C  | -2.72481200 | 1.11765400  | 1.74203500  |
| H  | -3.21741700 | 1.78835900  | 2.46718200  |
| H  | -2.83782900 | 0.10108700  | 2.14734600  |
| Ni | -0.59719500 | 0.43693700  | -0.03649400 |
| C  | 0.46202600  | -1.00190800 | -1.23809000 |
| C  | -0.07925300 | -1.55275700 | -0.01740500 |
| C  | 0.77346600  | -1.61267800 | 1.13659700  |
| C  | 2.00844300  | -1.02462700 | 1.11903800  |
| C  | 2.51344800  | -0.40575200 | -0.07107200 |
| C  | 1.72742100  | -0.40420100 | -1.22368000 |
| H  | -0.08486000 | -1.10294300 | -2.17426000 |
| H  | 0.40170600  | -2.08440900 | 2.04543000  |
| H  | 2.61780500  | -1.02509700 | 2.02249100  |
| H  | 2.10183400  | 0.04511700  | -2.14242700 |
| Br | -1.51292200 | -2.83557000 | -0.14682900 |

|   |            |             |             |
|---|------------|-------------|-------------|
| C | 3.77752600 | 0.34506900  | 0.00467100  |
| F | 3.66395300 | 1.48568000  | 0.73422600  |
| F | 4.24146200 | 0.71734600  | -1.19702100 |
| F | 4.76062000 | -0.35352500 | 0.60987100  |

#### T1a-4

Gibbs free energy before correction = -924.04316100

Gibbs free energy after correction = -924.02937085

|    |             |             |             |
|----|-------------|-------------|-------------|
| Ni | -0.19256500 | -0.11904100 | -0.92995700 |
| C  | -2.36999000 | -1.05733900 | 0.89587300  |
| C  | -3.77908900 | -1.14929000 | 1.46312800  |
| C  | -4.79520800 | -1.35380800 | 0.34680600  |
| C  | -4.64720600 | -0.26077300 | -0.70477300 |
| C  | -3.21541000 | -0.19469800 | -1.21444700 |
| H  | -3.82986100 | -1.96401400 | 2.19985000  |
| H  | -2.08612100 | -2.01626900 | 0.42672800  |
| H  | -1.63466900 | -0.85367800 | 1.68703800  |
| H  | -4.62207100 | -2.33579200 | -0.12529700 |
| H  | -5.81776300 | -1.37306100 | 0.74894400  |
| H  | -5.33211800 | -0.42911100 | -1.54853400 |
| H  | -4.91776500 | 0.71346300  | -0.26357500 |
| H  | -2.94734500 | -1.12764500 | -1.74308900 |
| H  | -3.07363900 | 0.62140500  | -1.93784300 |
| H  | -4.00863400 | -0.21522200 | 2.00357400  |
| N  | -2.22233200 | -0.02065100 | -0.14096800 |
| H  | -2.38581200 | 0.88960100  | 0.29564200  |
| C  | 1.53564800  | -1.78697600 | 1.05599500  |
| C  | 2.52391200  | -2.89585900 | 1.39180300  |
| C  | 3.84684700  | -2.67418700 | 0.66814100  |
| C  | 3.61185200  | -2.52130000 | -0.83051400 |
| C  | 2.59782600  | -1.42044200 | -1.10411000 |
| H  | 2.67235200  | -2.94686100 | 2.48005200  |
| H  | 1.90697100  | -0.82553200 | 1.44924500  |
| H  | 0.55695900  | -1.97047400 | 1.52120100  |
| H  | 4.32159400  | -1.75634800 | 1.05523800  |
| H  | 4.54405900  | -3.49898400 | 0.87152900  |
| H  | 4.55178900  | -2.30198300 | -1.35737500 |
| H  | 3.22880200  | -3.47050000 | -1.24169500 |
| H  | 3.00723900  | -0.44678800 | -0.78509800 |
| H  | 2.36257700  | -1.33204100 | -2.17655600 |
| H  | 2.09297400  | -3.86282100 | 1.08232500  |
| N  | 1.32619600  | -1.61702200 | -0.39119000 |
| H  | 0.90009400  | -2.47626900 | -0.75059600 |
| C  | 0.10090700  | 2.12994600  | 1.05722000  |

|   |             |            |             |
|---|-------------|------------|-------------|
| C | 0.88245400  | 3.27076900 | 1.69087100  |
| C | 1.25427400  | 4.31173400 | 0.64146700  |
| C | 1.99313000  | 3.65459800 | -0.51877600 |
| C | 1.18301600  | 2.50065700 | -1.08952200 |
| H | 0.29222500  | 3.72002300 | 2.50208400  |
| H | -0.85550500 | 2.50592900 | 0.65804400  |
| H | -0.13276900 | 1.34390900 | 1.78948400  |
| H | 0.33391200  | 4.78669500 | 0.26165600  |
| H | 1.86224300  | 5.11173500 | 1.08621400  |
| H | 2.20998800  | 4.38302600 | -1.31281300 |
| H | 2.96447800  | 3.26874800 | -0.16589700 |
| H | 0.24027700  | 2.86747700 | -1.52935500 |
| H | 1.72336800  | 1.97430500 | -1.89058400 |
| H | 1.79947000  | 2.86453500 | 2.15033200  |
| N | 0.81585400  | 1.50202400 | -0.06805600 |
| H | 1.68871100  | 1.11704100 | 0.30442800  |

### **<sup>s</sup>TS1a**

Gibbs free energy before correction = -3812.41644800

Gibbs free energy after correction = -3812.40265781

|    |             |             |             |
|----|-------------|-------------|-------------|
| Ni | 0.66429700  | -0.32782200 | 0.30643400  |
| C  | -1.21429400 | -1.39909700 | 0.68928400  |
| C  | -0.92092900 | -0.06455200 | 1.12466900  |
| C  | -1.92855700 | 0.93451300  | 1.07673100  |
| C  | -3.08654900 | 0.67145800  | 0.38672400  |
| C  | -3.31197000 | -0.59604900 | -0.20428600 |
| C  | -2.39427900 | -1.62103400 | -0.03547500 |
| H  | -0.62660800 | -2.25212000 | 1.02922300  |
| H  | -1.75267800 | 1.91668500  | 1.51516500  |
| H  | -3.83971900 | 1.45257200  | 0.27346700  |
| H  | -2.61588200 | -2.61867900 | -0.41258000 |
| C  | -4.58124900 | -0.80103900 | -0.94077000 |
| F  | -4.69549500 | -2.03011600 | -1.46213700 |
| F  | -4.72109800 | 0.06787300  | -1.96487500 |
| F  | -5.66823900 | -0.60762000 | -0.16394700 |
| C  | 1.48643900  | 2.54160200  | 0.43195200  |
| C  | 1.93584300  | 3.83747900  | -0.22575500 |
| C  | 0.89957200  | 4.31793900  | -1.23413300 |
| C  | 0.60254800  | 3.21911200  | -2.24720100 |
| C  | 0.18670700  | 1.93680200  | -1.54240600 |
| H  | 2.11967400  | 4.59770100  | 0.54665900  |
| H  | 0.57407900  | 2.71122300  | 1.02486500  |
| H  | 2.25142400  | 2.14956100  | 1.11577700  |
| H  | -0.02998200 | 4.57997100  | -0.70080900 |

|    |             |             |             |
|----|-------------|-------------|-------------|
| H  | 1.24232100  | 5.23115100  | -1.73989000 |
| H  | -0.18820000 | 3.52732900  | -2.94591200 |
| H  | 1.50381100  | 3.02147000  | -2.85183700 |
| H  | -0.76382700 | 2.08623100  | -1.00647700 |
| H  | 0.03131600  | 1.11628000  | -2.25743900 |
| H  | 2.89711500  | 3.66525600  | -0.73907800 |
| N  | 1.17535600  | 1.48205200  | -0.54536100 |
| H  | 2.04058700  | 1.28198800  | -1.05537100 |
| C  | 3.52987900  | -0.96065900 | 0.17890700  |
| C  | 4.69675600  | -1.85859000 | -0.20136300 |
| C  | 4.74319400  | -2.06912400 | -1.71011700 |
| C  | 3.40559600  | -2.59974500 | -2.21228100 |
| C  | 2.26834300  | -1.68603500 | -1.78223200 |
| H  | 5.63480900  | -1.41993700 | 0.16677400  |
| H  | 3.67586700  | 0.04484700  | -0.24801800 |
| H  | 3.44510100  | -0.84264900 | 1.26759300  |
| H  | 4.95919400  | -1.10628500 | -2.20344000 |
| H  | 5.55883300  | -2.75320900 | -1.98187000 |
| H  | 3.40462200  | -2.69937000 | -3.30681000 |
| H  | 3.22974600  | -3.60732300 | -1.79946600 |
| H  | 2.37691400  | -0.69801800 | -2.25827500 |
| H  | 1.29116400  | -2.08662800 | -2.08300500 |
| H  | 4.57901300  | -2.83181700 | 0.30421500  |
| N  | 2.23490700  | -1.46558800 | -0.32206900 |
| H  | 2.07814100  | -2.37654900 | 0.11890900  |
| Br | 0.35177700  | -0.07757200 | 2.87784700  |

### **<sup>‡</sup>TS1a**

Gibbs free energy before correction = -3812.39571900

Gibbs free energy after correction = -3812.38192881

|    |             |             |             |
|----|-------------|-------------|-------------|
| Ni | -0.03314600 | 0.06413800  | 0.23503600  |
| C  | -0.18654000 | -2.49379000 | -1.38640800 |
| C  | 0.74925300  | -2.26701500 | -0.38854400 |
| C  | 0.39966300  | -1.89579700 | 0.90912000  |
| C  | -0.97185200 | -1.69380900 | 1.20606400  |
| C  | -1.92312200 | -1.91047500 | 0.19372400  |
| C  | -1.54055800 | -2.33226700 | -1.08345300 |
| H  | 0.11084200  | -2.80336300 | -2.38827500 |
| H  | 1.14999800  | -1.82097500 | 1.69792200  |
| H  | -1.28979800 | -1.44479300 | 2.21720800  |
| H  | -2.30326900 | -2.51124000 | -1.84212800 |
| C  | -3.38129100 | -1.72859700 | 0.46371300  |
| F  | -4.05104200 | -2.88723100 | 0.37213100  |
| F  | -3.95533700 | -0.89482000 | -0.42434800 |

|    |             |             |             |
|----|-------------|-------------|-------------|
| F  | -3.62461100 | -1.22654100 | 1.67981600  |
| C  | -2.15358700 | 1.97049000  | 0.86180500  |
| C  | -3.00614500 | 3.19006100  | 0.55380000  |
| C  | -3.65607900 | 3.05716400  | -0.81797000 |
| C  | -2.59216500 | 2.81641900  | -1.88181700 |
| C  | -1.74639700 | 1.60485600  | -1.52731800 |
| H  | -3.76232200 | 3.31397200  | 1.34142000  |
| H  | -2.78637300 | 1.07257800  | 0.92795400  |
| H  | -1.62892100 | 2.07295900  | 1.82128800  |
| H  | -4.35576900 | 2.20377000  | -0.80592600 |
| H  | -4.24866300 | 3.95100500  | -1.05607900 |
| H  | -3.04627600 | 2.66678600  | -2.87118300 |
| H  | -1.93886300 | 3.70156100  | -1.95964500 |
| H  | -2.36785600 | 0.69623700  | -1.52458500 |
| H  | -0.93584700 | 1.44883400  | -2.25204500 |
| H  | -2.36884000 | 4.08990400  | 0.57655000  |
| N  | -1.13541000 | 1.70936400  | -0.18174400 |
| H  | -0.50123900 | 2.51323900  | -0.19220000 |
| C  | 2.07238500  | 1.59894400  | 1.57448500  |
| C  | 3.51644400  | 2.06655600  | 1.68274400  |
| C  | 3.92153800  | 2.86121000  | 0.44637400  |
| C  | 3.65418600  | 2.05219400  | -0.81764100 |
| C  | 2.20273600  | 1.60039100  | -0.86533800 |
| H  | 3.64637100  | 2.66188200  | 2.59746800  |
| H  | 1.38641200  | 2.46300200  | 1.57618200  |
| H  | 1.79544600  | 0.95821000  | 2.42417200  |
| H  | 3.33755300  | 3.79699300  | 0.40969500  |
| H  | 4.97961400  | 3.15229600  | 0.50422800  |
| H  | 3.89212000  | 2.63563300  | -1.71844500 |
| H  | 4.28889600  | 1.15048500  | -0.83076400 |
| H  | 1.53423100  | 2.47358300  | -0.94316800 |
| H  | 2.01359900  | 0.95566600  | -1.73554800 |
| H  | 4.16676700  | 1.18106300  | 1.78003300  |
| N  | 1.82625800  | 0.83747000  | 0.33919500  |
| H  | 2.43591800  | 0.00161400  | 0.33696400  |
| Br | 3.58332900  | -1.88875700 | -0.43322000 |

### S3a

Gibbs free energy before correction = -3812.48336600

Gibbs free energy after correction = -3812.46957581

|    |             |             |             |
|----|-------------|-------------|-------------|
| Ni | -0.83544600 | -0.44921000 | 0.00799100  |
| C  | 1.76256700  | -0.32282500 | 1.22005000  |
| C  | 1.04343400  | -0.35739200 | 0.01942500  |
| C  | 1.77430900  | -0.33520900 | -1.17782000 |

|   |             |             |             |
|---|-------------|-------------|-------------|
| C | 3.16138900  | -0.26029300 | -1.17775800 |
| C | 3.85464000  | -0.21600000 | 0.03372300  |
| C | 3.15327100  | -0.24830200 | 1.23624000  |
| H | 1.23016000  | -0.36226000 | 2.17318400  |
| H | 1.25001800  | -0.38444600 | -2.13488900 |
| H | 3.71480200  | -0.24120400 | -2.11786700 |
| H | 3.69118500  | -0.22015100 | 2.18261400  |
| C | 5.33851400  | -0.12093100 | -0.00615300 |
| F | 5.90022400  | -0.15375700 | 1.20925800  |
| F | 5.75602600  | 1.01680500  | -0.59545500 |
| F | 5.89089200  | -1.12125200 | -0.71866900 |
| C | -0.48527500 | 2.17681800  | -1.21475500 |
| C | -0.91242000 | 3.63450500  | -1.25191900 |
| C | -0.45726200 | 4.36340600  | 0.00695600  |
| C | -0.94977900 | 3.63619400  | 1.25274400  |
| C | -0.52250000 | 2.17814400  | 1.23039800  |
| H | -0.50473200 | 4.10964500  | -2.15456000 |
| H | 0.60983800  | 2.08985300  | -1.20081700 |
| H | -0.85164000 | 1.62184100  | -2.08899000 |
| H | 0.64461100  | 4.40140500  | 0.02324500  |
| H | -0.81050500 | 5.40342700  | 0.00104100  |
| H | -0.56894100 | 4.11253900  | 2.16639100  |
| H | -2.05116000 | 3.68543500  | 1.30226900  |
| H | 0.57241700  | 2.09006500  | 1.24994800  |
| H | -0.91599700 | 1.62444000  | 2.09357000  |
| H | -2.01177500 | 3.68351800  | -1.33445800 |
| N | -0.99543800 | 1.49833900  | 0.00067600  |
| H | -2.00921200 | 1.63954900  | -0.01498300 |
| C | -3.53665300 | -0.17992500 | -1.24224600 |
| C | -5.00999500 | -0.55448300 | -1.27418400 |
| C | -5.72402900 | -0.03685300 | -0.03122300 |
| C | -5.02974000 | -0.54063600 | 1.22843200  |
| C | -3.55615300 | -0.16604700 | 1.21574600  |
| H | -5.46965000 | -0.15864400 | -2.19019100 |
| H | -3.43074100 | 0.91555500  | -1.30780400 |
| H | -2.98767800 | -0.61289600 | -2.09001600 |
| H | -5.70963800 | 1.06621300  | -0.03713800 |
| H | -6.77993500 | -0.33940300 | -0.03779100 |
| H | -5.50382600 | -0.13508300 | 2.13276500  |
| H | -5.11678300 | -1.63839000 | 1.28451300  |
| H | -3.45113800 | 0.93007400  | 1.27064500  |
| H | -3.02078200 | -0.58952500 | 2.07688400  |
| H | -5.09656700 | -1.65277500 | -1.31966400 |
| N | -2.87211700 | -0.63954300 | -0.00527400 |

|    |             |             |             |
|----|-------------|-------------|-------------|
| H  | -2.93562300 | -1.66221200 | -0.00010400 |
| Br | -0.66775800 | -2.75392700 | 0.01195700  |

### T3a-1

Gibbs free energy before correction = -3812.39761800

Gibbs free energy after correction = -3812.38382781

|    |             |             |             |
|----|-------------|-------------|-------------|
| Ni | 0.15595300  | 0.15666300  | -0.00802500 |
| C  | -0.48211300 | -1.92011400 | -1.50650300 |
| C  | 0.41452400  | -1.84075900 | -0.43171200 |
| C  | -0.03848400 | -1.79878700 | 0.89418400  |
| C  | -1.42742800 | -1.78701800 | 1.14416000  |
| C  | -2.31222900 | -1.83922700 | 0.07449500  |
| C  | -1.84949600 | -1.91020700 | -1.24942600 |
| H  | -0.12549100 | -1.97775500 | -2.53509700 |
| H  | 0.66745100  | -1.83602700 | 1.72515100  |
| H  | -1.79811300 | -1.74004600 | 2.16679200  |
| H  | -2.56479900 | -1.93820100 | -2.07148200 |
| C  | -3.78007900 | -1.68926700 | 0.29917600  |
| F  | -4.49860800 | -2.51703500 | -0.47150300 |
| F  | -4.19239800 | -0.44033900 | -0.00549700 |
| F  | -4.13784700 | -1.91231300 | 1.56734500  |
| C  | -1.67403900 | 2.14374600  | 1.06866700  |
| C  | -2.45669000 | 3.44424000  | 0.99657300  |
| C  | -3.29405800 | 3.49579900  | -0.27546400 |
| C  | -2.40788400 | 3.28673800  | -1.49750000 |
| C  | -1.62496700 | 1.99044000  | -1.37482800 |
| H  | -3.08689800 | 3.53982000  | 1.89160000  |
| H  | -2.36543600 | 1.28834200  | 1.13317500  |
| H  | -1.02359000 | 2.10769500  | 1.95278400  |
| H  | -4.05600200 | 2.69825900  | -0.23967300 |
| H  | -3.83483400 | 4.44927500  | -0.34669400 |
| H  | -3.00273700 | 3.26717900  | -2.42120700 |
| H  | -1.69922300 | 4.12661500  | -1.59011800 |
| H  | -2.31358400 | 1.12997000  | -1.35891600 |
| H  | -0.93741900 | 1.84655900  | -2.21936800 |
| H  | -1.74982500 | 4.29057800  | 1.01027500  |
| N  | -0.82709200 | 1.92290500  | -0.12709600 |
| H  | -0.13124200 | 2.67368900  | -0.16011600 |
| C  | 2.38695800  | 1.47976700  | 1.36808500  |
| C  | 3.87352600  | 1.77761400  | 1.49965300  |
| C  | 4.39448300  | 2.47245300  | 0.24654200  |
| C  | 4.06497000  | 1.65162700  | -0.99528000 |
| C  | 2.57273700  | 1.36376300  | -1.06537600 |
| H  | 4.05347900  | 2.38840400  | 2.39551600  |

|    |            |             |             |
|----|------------|-------------|-------------|
| H  | 1.81145200 | 2.41967800  | 1.31883600  |
| H  | 2.01414200 | 0.91046400  | 2.23241300  |
| H  | 3.92187800 | 3.46592200  | 0.16047800  |
| H  | 5.47728000 | 2.64411100  | 0.32146300  |
| H  | 4.39009900 | 2.16841800  | -1.90929500 |
| H  | 4.59869800 | 0.68735000  | -0.95671600 |
| H  | 2.00409100 | 2.30026100  | -1.19582800 |
| H  | 2.33058900 | 0.70762500  | -1.91465100 |
| H  | 4.41187700 | 0.82592500  | 1.64470500  |
| N  | 2.08590900 | 0.70343800  | 0.15649100  |
| H  | 2.57095100 | -0.20916300 | 0.21528900  |
| Br | 3.27314600 | -2.37438800 | -0.12046200 |

### T3a-2

Gibbs free energy before correction = -3812.46940000

Gibbs free energy after correction = -3812.45560981

|    |             |             |             |
|----|-------------|-------------|-------------|
| Ni | 0.88393000  | -0.06544700 | 0.59105300  |
| C  | -1.66205700 | -1.24182500 | -0.47030100 |
| C  | -1.03920800 | -0.15107900 | 0.14718500  |
| C  | -1.87070400 | 0.89564000  | 0.58035300  |
| C  | -3.24713000 | 0.86692800  | 0.39310200  |
| C  | -3.83360800 | -0.23064700 | -0.24050100 |
| C  | -3.04151500 | -1.29052400 | -0.66988700 |
| H  | -1.06866300 | -2.09612800 | -0.80800700 |
| H  | -1.43479900 | 1.76022600  | 1.09112300  |
| H  | -3.87419300 | 1.69050100  | 0.73789200  |
| H  | -3.49841400 | -2.15136000 | -1.15578200 |
| C  | -5.31307900 | -0.23925300 | -0.40846200 |
| F  | -5.75876300 | -1.30384400 | -1.08701500 |
| F  | -5.75339600 | 0.85264700  | -1.06066900 |
| F  | -5.95284100 | -0.23816300 | 0.77657500  |
| C  | 2.21503600  | 2.49202700  | 0.61095700  |
| C  | 2.88953600  | 3.70967800  | 0.00052200  |
| C  | 1.94640300  | 4.43713000  | -0.94920500 |
| C  | 1.40795600  | 3.47314400  | -1.99916900 |
| C  | 0.75151600  | 2.27325300  | -1.33760200 |
| H  | 3.23664300  | 4.37352500  | 0.80425400  |
| H  | 1.37120800  | 2.79342100  | 1.25373500  |
| H  | 2.91528000  | 1.91773500  | 1.23361500  |
| H  | 1.10280100  | 4.85510700  | -0.37485500 |
| H  | 2.45699600  | 5.28509700  | -1.42564300 |
| H  | 0.68059500  | 3.96903800  | -2.65670700 |
| H  | 2.23380000  | 3.12356100  | -2.64129300 |
| H  | -0.11965800 | 2.59203600  | -0.74617500 |



|    |            |             |             |
|----|------------|-------------|-------------|
| H  | 0.39408400 | 1.54508900  | -2.07702900 |
| H  | 3.78556500 | 3.37891000  | -0.55048600 |
| N  | 1.66777700 | 1.57333500  | -0.41384000 |
| H  | 2.46098100 | 1.23315600  | -0.96613000 |
| C  | 3.22925400 | -1.64977900 | -0.10861300 |
| C  | 3.93284500 | -2.80346600 | -0.80459900 |
| C  | 3.78945200 | -2.69747900 | -2.31746800 |
| C  | 2.31917300 | -2.58811300 | -2.70214500 |
| C  | 1.66027200 | -1.42800100 | -1.97388900 |
| H  | 4.98986400 | -2.81735000 | -0.50497400 |
| H  | 3.71476200 | -0.69263800 | -0.36073300 |
| H  | 3.25520300 | -1.75430900 | 0.98335100  |
| H  | 4.32395600 | -1.79998200 | -2.67160500 |
| H  | 4.25659600 | -3.56021900 | -2.81150600 |
| H  | 2.20103100 | -2.45173000 | -3.78588300 |
| H  | 1.79484900 | -3.52153300 | -2.43754000 |
| H  | 2.12673900 | -0.48011900 | -2.28378000 |
| H  | 0.58945800 | -1.35915100 | -2.20400800 |
| H  | 3.48925300 | -3.75115200 | -0.45689000 |
| N  | 1.80791400 | -1.53350800 | -0.50834200 |
| H  | 1.32947300 | -2.38856900 | -0.20667900 |
| Br | 1.15962400 | -0.71145700 | 2.87902400  |

#### S4a

Gibbs free energy before correction = -4064.05466700

Gibbs free energy after correction = -4064.04087686

|    |             |            |             |
|----|-------------|------------|-------------|
| Ni | 0.67669600  | 0.03178100 | -0.18211500 |
| Br | 1.18141900  | 0.63712900 | 2.76580300  |
| C  | -0.56174900 | 2.70536200 | 0.45844800  |
| C  | -0.29687600 | 4.19588500 | 0.58485500  |
| C  | -0.05978500 | 4.82860400 | -0.77964200 |
| C  | 1.05460100  | 4.09181500 | -1.50947500 |
| C  | 0.77521900  | 2.59810300 | -1.57017400 |
| H  | -1.14395600 | 4.67045500 | 1.09965000  |
| H  | -1.47407900 | 2.52323000 | -0.12731000 |
| H  | -0.66970200 | 2.23073400 | 1.43981700  |
| H  | -0.98688800 | 4.76448600 | -1.37344400 |
| H  | 0.18087500  | 5.89606400 | -0.68115900 |
| H  | 1.18759600  | 4.47761400 | -2.52965900 |
| H  | 2.01050500  | 4.24753000 | -0.98102700 |
| H  | -0.13582600 | 2.39379900 | -2.15307400 |
| H  | 1.60253400  | 2.07172800 | -2.06236800 |
| H  | 0.58903700  | 4.34759100 | 1.22591400  |
| N  | 0.55997700  | 2.01475400 | -0.22609800 |

|   |             |             |             |
|---|-------------|-------------|-------------|
| H | 1.37777800  | 2.22019600  | 0.36009600  |
| C | 3.10021300  | -0.30167200 | -1.87974100 |
| C | 4.53758700  | 0.02694300  | -2.24885400 |
| C | 5.50410300  | -0.55263300 | -1.22334000 |
| C | 5.12524600  | -0.09665200 | 0.18041800  |
| C | 3.67170600  | -0.41712700 | 0.48797600  |
| H | 4.75309900  | -0.35263100 | -3.25722900 |
| H | 2.94778600  | -1.39263600 | -1.90495800 |
| H | 2.38989400  | 0.13835700  | -2.59318800 |
| H | 5.46167300  | -1.65389500 | -1.26972700 |
| H | 6.53790300  | -0.26612700 | -1.46058800 |
| H | 5.76987200  | -0.56746400 | 0.93584200  |
| H | 5.27691300  | 0.99255500  | 0.26952100  |
| H | 3.52963200  | -1.51127200 | 0.48754600  |
| H | 3.34466500  | -0.04820100 | 1.46815100  |
| H | 4.65050300  | 1.12382200  | -2.28964200 |
| N | 2.74855500  | 0.16543700  | -0.51772300 |
| H | 2.94622700  | 1.17109000  | -0.50477300 |
| C | -1.88593200 | -0.08310800 | -1.44330800 |
| C | -1.19919300 | -0.10586000 | -0.22296200 |
| C | -1.96097100 | -0.19307000 | 0.95291100  |
| C | -3.34780300 | -0.25105900 | 0.91045200  |
| C | -4.00992700 | -0.22048100 | -0.31956400 |
| C | -3.27815600 | -0.13779300 | -1.50032300 |
| H | -1.33304600 | -0.02148700 | -2.38461300 |
| H | -1.44260400 | -0.18099400 | 1.91514600  |
| H | -3.92722300 | -0.31331400 | 1.83318000  |
| H | -3.79085600 | -0.11396300 | -2.46065600 |
| C | -5.49626600 | -0.28733500 | -0.32120000 |
| F | -5.95026300 | -1.42836200 | 0.23268500  |
| F | -6.02499200 | -0.21708400 | -1.54976700 |
| F | -6.04730800 | 0.70931000  | 0.39773800  |
| C | 0.27250900  | -2.66669100 | -1.32466600 |
| C | 0.73908000  | -4.11325000 | -1.33017600 |
| C | 0.38376100  | -4.80438900 | -0.01898800 |
| C | 0.92057400  | -4.00956100 | 1.16560700  |
| C | 0.44848900  | -2.56696700 | 1.10976100  |
| H | 0.29297200  | -4.63590100 | -2.18746000 |
| H | -0.82159100 | -2.60895300 | -1.24513400 |
| H | 0.56569200  | -2.14422500 | -2.24521000 |
| H | -0.71351900 | -4.87663400 | 0.06404100  |
| H | 0.77097400  | -5.83251200 | -0.00687900 |
| H | 0.60612200  | -4.45839400 | 2.11799500  |
| H | 2.02452100  | -4.02692900 | 1.15624000  |

|   |             |             |             |
|---|-------------|-------------|-------------|
| H | -0.64791800 | -2.51317900 | 1.17291300  |
| H | 0.85342200  | -1.94564200 | 1.92036700  |
| H | 1.83284800  | -4.13533400 | -1.47791600 |
| N | 0.83730100  | -1.92555100 | -0.17180700 |
| H | 1.85062600  | -2.05055200 | -0.23887700 |

#### T4a

Gibbs free energy before correction = -1491.82223100

Gibbs free energy after correction = -1491.80844074

|    |             |             |             |
|----|-------------|-------------|-------------|
| Ni | 0.86232700  | 0.14036400  | -0.23947600 |
| C  | -1.92857600 | -0.70706400 | -0.89115100 |
| C  | -1.08503700 | -0.14503900 | 0.08810300  |
| C  | -1.73270600 | 0.39099000  | 1.21474900  |
| C  | -3.11675800 | 0.36390600  | 1.37570200  |
| C  | -3.90960600 | -0.20835000 | 0.38450600  |
| C  | -3.31249800 | -0.74226500 | -0.75856200 |
| H  | -1.49472400 | -1.13328700 | -1.80207500 |
| H  | -1.14177900 | 0.85955800  | 2.00884700  |
| H  | -3.57923300 | 0.78842500  | 2.26592100  |
| H  | -3.93685800 | -1.18362800 | -1.53734500 |
| C  | -5.39350900 | -0.24471900 | 0.49118700  |
| F  | -5.84735500 | 0.22305000  | 1.66130700  |
| F  | -5.88027200 | -1.49282800 | 0.35465200  |
| F  | -5.98761300 | 0.48340700  | -0.47444800 |
| C  | 2.09261300  | -1.66606100 | -2.21033600 |
| C  | 2.82093700  | -2.90138400 | -2.71710100 |
| C  | 1.99912100  | -4.15792900 | -2.45613600 |
| C  | 1.62255800  | -4.24871600 | -0.98200200 |
| C  | 0.91741900  | -2.97972000 | -0.52965400 |
| H  | 3.04110600  | -2.78646200 | -3.78774100 |
| H  | 1.15920700  | -1.51514100 | -2.77820300 |
| H  | 2.70224000  | -0.75990400 | -2.33554100 |
| H  | 1.07827300  | -4.12147600 | -3.06231300 |
| H  | 2.55064800  | -5.05388300 | -2.77279400 |
| H  | 0.97698000  | -5.11770200 | -0.79183000 |
| H  | 2.53315200  | -4.38819600 | -0.37505800 |
| H  | -0.03358700 | -2.85935200 | -1.07184100 |
| H  | 0.67645000  | -3.01175000 | 0.54133600  |
| H  | 3.79067100  | -2.97978600 | -2.19751000 |
| N  | 1.71613000  | -1.76693500 | -0.78479300 |
| H  | 2.58282700  | -1.84682600 | -0.24464800 |
| C  | 3.19272000  | 0.66161600  | 1.51379400  |
| C  | 3.83567600  | 0.93181300  | 2.86474100  |
| C  | 3.64679000  | -0.25538400 | 3.80141800  |

|   |             |             |             |
|---|-------------|-------------|-------------|
| C | 2.17092600  | -0.62108600 | 3.90489600  |
| C | 1.57583300  | -0.85139300 | 2.52436700  |
| H | 4.90123700  | 1.16207600  | 2.72659000  |
| H | 3.69123600  | -0.18468800 | 1.01389100  |
| H | 3.27294200  | 1.52841700  | 0.84518400  |
| H | 4.20653200  | -1.12006100 | 3.40680200  |
| H | 4.06263500  | -0.03628000 | 4.79441400  |
| H | 2.02760300  | -1.51957400 | 4.52120200  |
| H | 1.61994100  | 0.19682700  | 4.39892300  |
| H | 2.06482800  | -1.71279200 | 2.04214700  |
| H | 0.50130700  | -1.07010000 | 2.57756800  |
| H | 3.36861500  | 1.82968200  | 3.30424000  |
| N | 1.76322800  | 0.30977200  | 1.63354800  |
| H | 1.28370500  | 1.10629700  | 2.06382200  |
| C | 0.99152700  | 3.08535700  | -0.11146700 |
| C | 1.59845900  | 4.32136800  | -0.77638900 |
| C | 0.99285900  | 4.53093100  | -2.15940400 |
| C | 1.08686600  | 3.25281300  | -2.98453000 |
| C | 0.49613300  | 2.08474600  | -2.19636000 |
| H | 1.44827000  | 5.21040200  | -0.14486600 |
| H | -0.09017900 | 3.29718000  | 0.07893500  |
| H | 1.45626700  | 2.93611900  | 0.87757500  |
| H | -0.07139100 | 4.80217900  | -2.04542200 |
| H | 1.47578200  | 5.37218100  | -2.67793000 |
| H | 0.56695100  | 3.36858000  | -3.94792100 |
| H | 2.14366100  | 3.03170200  | -3.20877800 |
| H | -0.59544200 | 2.28650500  | -2.06363100 |
| H | 0.56727900  | 1.15247100  | -2.78529800 |
| H | 2.68730000  | 4.16825600  | -0.86861000 |
| N | 1.15308300  | 1.89782000  | -0.91711500 |

### S5a

Gibbs free energy before correction = -4408.98373900

Gibbs free energy after correction = -4408.96994887

|    |             |             |             |
|----|-------------|-------------|-------------|
| Ni | -0.45644100 | 0.69385100  | 0.35329200  |
| Br | 0.78745300  | 0.05905300  | -2.33831600 |
| C  | -0.08325600 | -2.29407100 | 0.36002100  |
| C  | 0.74947000  | -3.49710200 | 0.77296900  |
| C  | 0.85781400  | -3.59336200 | 2.28884900  |
| C  | 1.39233300  | -2.28521400 | 2.85432900  |
| C  | 0.54839000  | -1.10590700 | 2.39598500  |
| H  | 0.28861700  | -4.40252500 | 0.35290200  |
| H  | -1.11590100 | -2.41933700 | 0.71344700  |
| H  | -0.10362400 | -2.16211700 | -0.72920700 |

|   |             |             |             |
|---|-------------|-------------|-------------|
| H | -0.13970200 | -3.79206000 | 2.71652600  |
| H | 1.50257300  | -4.43401000 | 2.58154700  |
| H | 1.41208300  | -2.30333500 | 3.95309200  |
| H | 2.43073100  | -2.12998700 | 2.51659200  |
| H | -0.47528500 | -1.18670400 | 2.79360300  |
| H | 0.97523800  | -0.16648600 | 2.77059200  |
| H | 1.75734300  | -3.41163800 | 0.33862900  |
| N | 0.42940100  | -1.01609100 | 0.92157200  |
| H | 1.37785200  | -0.92799200 | 0.53239500  |
| C | 1.08125600  | 2.55674300  | 2.11309100  |
| C | 2.39512800  | 3.09777000  | 2.65300700  |
| C | 3.08608600  | 3.96596200  | 1.60847700  |
| C | 3.25052000  | 3.19700300  | 0.30303800  |
| C | 1.92226700  | 2.62799900  | -0.17122300 |
| H | 2.20894700  | 3.66186900  | 3.57741400  |
| H | 0.39902000  | 3.39313300  | 1.89030100  |
| H | 0.57519600  | 1.91601400  | 2.84787600  |
| H | 2.47239900  | 4.86428100  | 1.42605700  |
| H | 4.05937100  | 4.31736000  | 1.97766300  |
| H | 3.67055700  | 3.83971700  | -0.48335000 |
| H | 3.96634700  | 2.37045600  | 0.45187100  |
| H | 1.23980200  | 3.46099400  | -0.41221200 |
| H | 2.00894100  | 2.01572800  | -1.07795400 |
| H | 3.04446100  | 2.24657900  | 2.92321200  |
| N | 1.26839000  | 1.78449200  | 0.86182900  |
| H | 1.94845100  | 1.05064000  | 1.07934300  |
| C | -2.93768700 | -0.35881000 | 1.32466700  |
| C | -2.11831000 | -0.17974900 | 0.20293200  |
| C | -2.57032400 | -0.69270300 | -1.02303600 |
| C | -3.78354600 | -1.36061200 | -1.12159900 |
| C | -4.58008900 | -1.53247900 | 0.01363600  |
| C | -4.15602400 | -1.03215300 | 1.24100500  |
| H | -2.63004500 | 0.03110100  | 2.29869000  |
| H | -1.93184300 | -0.58505400 | -1.90344200 |
| H | -4.11999400 | -1.75792900 | -2.08067400 |
| H | -4.77286200 | -1.16423800 | 2.12863300  |
| C | -5.86789500 | -2.26305100 | -0.13264800 |
| F | -6.66407200 | -1.69924800 | -1.06110900 |
| F | -6.57504700 | -2.31546200 | 1.00354900  |
| F | -5.68554200 | -3.53565900 | -0.53532700 |
| C | 4.88984600  | -1.91574200 | -2.16382700 |
| C | 3.59603500  | -2.29835700 | -1.41003900 |
| H | 4.69344900  | -1.12947200 | -2.90869500 |
| H | 5.32108300  | -2.77626700 | -2.69555800 |

|   |             |             |             |
|---|-------------|-------------|-------------|
| H | 2.70584800  | -1.85338400 | -1.87956600 |
| H | 3.46152600  | -3.38994400 | -1.37029600 |
| C | 5.38596600  | -0.14628200 | -0.64741600 |
| H | 6.09910800  | 0.18474300  | 0.12198700  |
| H | 5.36789400  | 0.62146100  | -1.43519000 |
| C | 3.97583700  | -0.37522700 | -0.05575800 |
| H | 3.90054700  | 0.01789600  | 0.97325200  |
| H | 3.19849200  | 0.10197300  | -0.67421700 |
| C | 4.75325000  | -2.51015600 | 0.66728000  |
| H | 4.85535700  | -2.06860700 | 1.67015100  |
| H | 4.46080000  | -3.56358500 | 0.79879700  |
| C | 6.06532100  | -2.37414500 | -0.14198100 |
| H | 6.89817600  | -2.04699200 | 0.49689600  |
| H | 6.35523800  | -3.33131600 | -0.59908000 |
| N | 3.66802000  | -1.80828100 | -0.02510800 |
| N | 5.89167300  | -1.39737400 | -1.22314700 |
| C | -2.37686200 | 2.89486300  | 0.83362700  |
| C | -2.70996900 | 4.35216800  | 0.55733600  |
| C | -3.14338500 | 4.54566600  | -0.89092800 |
| C | -2.09340400 | 3.98282500  | -1.84142100 |
| C | -1.77519200 | 2.53596700  | -1.50554000 |
| H | -3.49246700 | 4.68464300  | 1.25326100  |
| H | -3.26306400 | 2.26004400  | 0.69900100  |
| H | -2.01843700 | 2.75075100  | 1.86178200  |
| H | -4.09759700 | 4.01771500  | -1.05478700 |
| H | -3.32915500 | 5.60806500  | -1.10008700 |
| H | -2.42991200 | 4.04779000  | -2.88550700 |
| H | -1.16753200 | 4.57978900  | -1.76891900 |
| H | -2.66630100 | 1.90302500  | -1.62434500 |
| H | -0.98321200 | 2.11000400  | -2.13641800 |
| H | -1.81738500 | 4.96820300  | 0.76383700  |
| N | -1.33289200 | 2.39918300  | -0.09483700 |
| H | -0.55327200 | 3.05309000  | 0.00388100  |

### **<sup>s</sup>TS2a**

Gibbs free energy before correction = -4408.94695200

Gibbs free energy after correction = -4408.93316187

|    |             |             |             |
|----|-------------|-------------|-------------|
| Ni | -0.20065100 | 0.65761300  | 0.41435500  |
| Br | 0.76699300  | 0.30038300  | -2.64982000 |
| C  | -0.11784500 | -2.26788400 | 0.86905800  |
| C  | 0.45556000  | -3.51487100 | 1.53917800  |
| C  | 0.55848900  | -3.30418200 | 3.04112100  |
| C  | 1.36336400  | -2.04379300 | 3.30698000  |
| C  | 0.77516700  | -0.84725900 | 2.56036600  |

|   |             |             |             |
|---|-------------|-------------|-------------|
| H | -0.19621100 | -4.36999500 | 1.30333700  |
| H | -1.15634300 | -2.18310800 | 1.24248600  |
| H | -0.19751300 | -2.41662600 | -0.21889400 |
| H | -0.45570500 | -3.18303600 | 3.46034400  |
| H | 1.00549500  | -4.17623700 | 3.54014600  |
| H | 1.39731000  | -1.81152700 | 4.38228000  |
| H | 2.40591400  | -2.20066200 | 2.98543600  |
| H | -0.21152500 | -0.61844900 | 3.02392100  |
| H | 1.42061700  | 0.02045000  | 2.75840000  |
| H | 1.45054500  | -3.76622900 | 1.14014600  |
| N | 0.63473800  | -1.02653200 | 1.10992100  |
| H | 2.02825500  | -1.40341500 | 0.41188300  |
| C | 1.51890300  | 2.55335200  | 2.07721600  |
| C | 2.90292400  | 2.99669900  | 2.52361700  |
| C | 3.56997100  | 3.83394800  | 1.43894200  |
| C | 3.57033000  | 3.08671600  | 0.11045900  |
| C | 2.17382000  | 2.59781300  | -0.24507900 |
| H | 2.82741700  | 3.55816800  | 3.46539600  |
| H | 0.89120700  | 3.43820600  | 1.88492800  |
| H | 1.01264900  | 1.96636800  | 2.85348700  |
| H | 3.01030800  | 4.77737800  | 1.32327500  |
| H | 4.59318800  | 4.10804300  | 1.73084900  |
| H | 3.94565800  | 3.72790800  | -0.69974800 |
| H | 4.25662800  | 2.22593500  | 0.17214700  |
| H | 1.52634300  | 3.48060000  | -0.38823400 |
| H | 2.13227000  | 2.02967400  | -1.18299800 |
| H | 3.51025300  | 2.09835400  | 2.73394200  |
| N | 1.56722400  | 1.76560000  | 0.82405300  |
| H | 2.20366800  | 0.98032600  | 0.98495700  |
| C | -2.80320900 | -0.18292900 | 1.30230900  |
| C | -1.89080900 | -0.14324400 | 0.23758400  |
| C | -2.30047500 | -0.71220400 | -0.98142300 |
| C | -3.54396800 | -1.31336200 | -1.11808500 |
| C | -4.42602600 | -1.35577000 | -0.03368000 |
| C | -4.05613400 | -0.78254600 | 1.17943600  |
| H | -2.53495300 | 0.24779700  | 2.27131200  |
| H | -1.60838000 | -0.68280100 | -1.82769000 |
| H | -3.84114200 | -1.75878700 | -2.06947300 |
| H | -4.74039800 | -0.80606700 | 2.02658400  |
| C | -5.75002200 | -2.00312700 | -0.22512200 |
| F | -6.49325800 | -1.37503300 | -1.15863000 |
| F | -6.48713000 | -2.03710400 | 0.89330300  |
| F | -5.63524900 | -3.27565700 | -0.65346700 |
| C | 3.84938800  | -3.09513900 | -2.00222000 |

|   |             |             |             |
|---|-------------|-------------|-------------|
| C | 2.56775900  | -2.58805200 | -1.31608700 |
| H | 3.77780700  | -2.96266500 | -3.08962800 |
| H | 4.00664100  | -4.16376000 | -1.80502400 |
| H | 1.94638300  | -1.94947300 | -1.96007600 |
| H | 1.95503200  | -3.40756100 | -0.92436700 |
| C | 4.76503400  | -0.93242300 | -1.63520900 |
| H | 5.68926400  | -0.37851800 | -1.42533800 |
| H | 4.47568600  | -0.72606500 | -2.67534400 |
| C | 3.64439100  | -0.50223600 | -0.67464800 |
| H | 4.03041000  | 0.03100800  | 0.20437800  |
| H | 2.87323800  | 0.09149900  | -1.17973200 |
| C | 3.93144800  | -2.46095800 | 0.70804800  |
| H | 4.09569200  | -1.85133200 | 1.60533600  |
| H | 3.46014000  | -3.40398400 | 1.00822100  |
| C | 5.22580700  | -2.69015800 | -0.09980400 |
| H | 6.03974700  | -2.05876100 | 0.27981000  |
| H | 5.54612000  | -3.73611700 | -0.01456700 |
| N | 2.96935200  | -1.72841800 | -0.16016800 |
| N | 5.02290200  | -2.36787400 | -1.51287900 |
| C | -1.86704100 | 3.00397000  | 1.02775600  |
| C | -2.14360900 | 4.47771900  | 0.77531100  |
| C | -2.82821200 | 4.67566100  | -0.57181600 |
| C | -2.02038000 | 4.01223600  | -1.68083500 |
| C | -1.74600000 | 2.55190000  | -1.36024800 |
| H | -2.75470700 | 4.88198800  | 1.59438800  |
| H | -2.80707700 | 2.43629300  | 1.07519600  |
| H | -1.34375600 | 2.84990400  | 1.98131100  |
| H | -3.83196600 | 4.21986100  | -0.53526900 |
| H | -2.97367000 | 5.74481300  | -0.77961000 |
| H | -2.54298600 | 4.08288200  | -2.64531500 |
| H | -1.05722900 | 4.53863300  | -1.80387700 |
| H | -2.68661600 | 1.98606000  | -1.29336200 |
| H | -1.11100300 | 2.06520800  | -2.11242600 |
| H | -1.18625500 | 5.02803100  | 0.78988000  |
| N | -1.05329200 | 2.40985900  | -0.05723400 |
| H | -0.22047900 | 2.99564300  | -0.13649400 |

### S6a

Gibbs free energy before correction = -1491.83881600

Gibbs free energy after correction = -1491.82502574

|    |             |             |             |
|----|-------------|-------------|-------------|
| Ni | -0.74339900 | 0.08745700  | 0.00325400  |
| C  | 1.87846600  | -0.05006900 | -1.17780300 |
| C  | 1.13122500  | -0.04654700 | 0.01480700  |
| C  | 1.86103000  | -0.03050600 | 1.21473600  |



|   |             |             |             |
|---|-------------|-------------|-------------|
| C | 3.25409000  | -0.04253000 | 1.23664400  |
| C | 3.96070700  | -0.06033500 | 0.03709500  |
| C | 3.26821900  | -0.06126700 | -1.17531800 |
| H | 1.36398300  | -0.05500800 | -2.14250500 |
| H | 1.33339200  | -0.01985400 | 2.17238600  |
| H | 3.78977500  | -0.03707000 | 2.18485600  |
| H | 3.82407900  | -0.07029300 | -2.11437100 |
| C | 5.44747400  | -0.08442200 | 0.00148900  |
| F | 6.00315000  | -0.04864400 | 1.21964600  |
| F | 5.95466000  | 0.95548500  | -0.68864500 |
| F | 5.92055500  | -1.18827900 | -0.60890200 |
| C | -3.39377800 | -0.32362900 | 1.21228900  |
| C | -4.90896400 | -0.19974300 | 1.24095300  |
| C | -5.52199300 | -0.81944100 | -0.00896900 |
| C | -4.90269800 | -0.20587100 | -1.25884400 |
| C | -3.38763800 | -0.32929200 | -1.22218400 |
| H | -5.30013800 | -0.67574700 | 2.15129300  |
| H | -3.08597100 | -1.37925100 | 1.22198800  |
| H | -2.93443200 | 0.16717400  | 2.08265800  |
| H | -5.32888700 | -1.90569100 | -0.00578200 |
| H | -6.61339400 | -0.69120800 | -0.01203500 |
| H | -5.28935000 | -0.68639100 | -2.16873900 |
| H | -5.17759000 | 0.86117400  | -1.32056900 |
| H | -3.07924000 | -1.38478100 | -1.22555200 |
| H | -2.92415300 | 0.15786300  | -2.09242000 |
| H | -5.18394200 | 0.86764600  | 1.29607000  |
| N | -2.79957300 | 0.26277500  | -0.00484600 |
| H | -3.05340400 | 1.25431900  | -0.00784400 |
| C | -1.04562800 | 2.75111200  | 1.22464600  |
| C | -0.71068600 | 4.23419500  | 1.24791600  |
| C | -1.22998200 | 4.92388800  | -0.00794300 |
| C | -0.69522900 | 4.22879200  | -1.25432900 |
| C | -1.02990400 | 2.74566400  | -1.22876200 |
| H | -1.13292200 | 4.68951400  | 2.15433100  |
| H | -2.13693400 | 2.61317000  | 1.26252600  |
| H | -0.61692500 | 2.22496000  | 2.08866400  |
| H | -2.33233200 | 4.88349500  | -0.01457200 |
| H | -0.95253100 | 5.98671500  | -0.00854300 |
| H | -1.10661200 | 4.68002800  | -2.16774400 |
| H | 0.39991900  | 4.34783000  | -1.30345800 |
| H | -2.12057800 | 2.60693900  | -1.28009000 |
| H | -0.58972500 | 2.21587000  | -2.08475200 |
| H | 0.38383200  | 4.35302900  | 1.30984000  |
| N | -0.54136400 | 2.08678900  | 0.00260600  |

|   |             |             |             |
|---|-------------|-------------|-------------|
| H | 0.47422900  | 2.21693500  | 0.00901400  |
| C | -0.44990800 | -2.48138500 | 1.18341600  |
| C | -0.98755900 | -3.91133100 | 1.25063500  |
| C | -0.58082800 | -4.68199700 | 0.00056600  |
| C | -0.97697300 | -3.90912300 | -1.25150600 |
| C | -0.44085700 | -2.47891900 | -1.17719500 |
| H | -0.62031100 | -4.41575500 | 2.15797500  |
| H | 0.66616500  | -2.54097700 | 1.22624300  |
| H | -0.76174600 | -1.92440400 | 2.08413500  |
| H | 0.51582300  | -4.81261200 | 0.00509600  |
| H | -1.01531900 | -5.69281300 | -0.00221900 |
| H | -0.60152100 | -4.41155100 | -2.15660200 |
| H | -2.07711800 | -3.87458400 | -1.33088600 |
| H | 0.67555600  | -2.53746900 | -1.21190500 |
| H | -0.74663700 | -1.92047700 | -2.07909800 |
| H | -2.08835600 | -3.87619900 | 1.32033400  |
| N | -0.92739000 | -1.79725800 | 0.00199000  |

### **<sup>s</sup>TS3a**

Gibbs free energy before correction = -1491.81577800

Gibbs free energy after correction = -1491.80198774

|    |             |             |             |
|----|-------------|-------------|-------------|
| Ni | 0.77406300  | 0.18147900  | 0.02019500  |
| C  | -1.81505800 | -0.14519200 | 1.19755100  |
| C  | -1.02084700 | -0.23316200 | 0.00467500  |
| C  | -1.76561600 | -0.15111800 | -1.21854800 |
| C  | -3.14651100 | -0.09390200 | -1.24435200 |
| C  | -3.89032300 | -0.07018700 | -0.05656400 |
| C  | -3.19384100 | -0.08646900 | 1.16269300  |
| H  | -1.32083100 | -0.11336300 | 2.17070800  |
| H  | -1.23167300 | -0.12597500 | -2.17086800 |
| H  | -3.66145000 | -0.03539200 | -2.20368400 |
| H  | -3.75219000 | -0.02134100 | 2.09899600  |
| C  | -5.36321300 | -0.05461400 | -0.05236900 |
| F  | -5.89044200 | 0.22476700  | -1.25683100 |
| F  | -5.87575600 | 0.85044000  | 0.81228100  |
| F  | -5.91280600 | -1.23602600 | 0.32694800  |
| C  | 3.36598700  | -0.40703500 | -1.26498500 |
| C  | 4.88498100  | -0.44869900 | -1.32791800 |
| C  | 5.44958500  | -1.18978700 | -0.12167600 |
| C  | 4.93394100  | -0.56552600 | 1.16958400  |
| C  | 3.41378800  | -0.52197100 | 1.16961100  |
| H  | 5.20265300  | -0.92160800 | -2.26794900 |
| H  | 2.95757500  | -1.42726300 | -1.33562800 |
| H  | 2.94238500  | 0.17152300  | -2.09815900 |

|   |             |             |             |
|---|-------------|-------------|-------------|
| H | 5.13037400  | -2.24558500 | -0.16442700 |
| H | 6.54815700  | -1.18988400 | -0.14314500 |
| H | 5.28721700  | -1.12364700 | 2.04813400  |
| H | 5.32458200  | 0.46161000  | 1.26523800  |
| H | 3.00702100  | -1.54531900 | 1.15645400  |
| H | 3.02184700  | -0.02691400 | 2.06972800  |
| H | 5.27302400  | 0.58381800  | -1.34213300 |
| N | 2.85930400  | 0.17235500  | -0.00683100 |
| H | 3.19203700  | 1.13971200  | 0.03250000  |
| C | 1.12066000  | 2.81648000  | -1.18463300 |
| C | 0.82961100  | 4.30891700  | -1.19623500 |
| C | 1.36585500  | 4.97294900  | 0.06630200  |
| C | 0.81073300  | 4.28099900  | 1.30552800  |
| C | 1.10071500  | 2.78880800  | 1.26462100  |
| H | 1.26629500  | 4.76000600  | -2.09804200 |
| H | 2.20766800  | 2.64344200  | -1.21578200 |
| H | 0.68044300  | 2.31125000  | -2.05549600 |
| H | 2.46673900  | 4.90272000  | 0.07367900  |
| H | 1.11743100  | 6.04299100  | 0.07629100  |
| H | 1.23473500  | 4.71111900  | 2.22348400  |
| H | -0.28049700 | 4.43182900  | 1.35564100  |
| H | 2.18677900  | 2.61351600  | 1.30960800  |
| H | 0.64595300  | 2.26466400  | 2.11654100  |
| H | -0.26094800 | 4.45996500  | -1.25876800 |
| N | 0.59682200  | 2.15235200  | 0.02839000  |
| H | -0.41925400 | 2.28597800  | 0.02137300  |
| C | 0.06902900  | -2.42902100 | -1.16746700 |
| C | 0.93433000  | -3.68390100 | -1.17100200 |
| C | 0.66849000  | -4.51680500 | 0.07328200  |
| C | 0.89022100  | -3.66103300 | 1.31065800  |
| C | 0.03925200  | -2.39728700 | 1.25196800  |
| H | 0.73256200  | -4.26099100 | -2.08600700 |
| H | -0.99547700 | -2.74199100 | -1.28527300 |
| H | 0.30794000  | -1.80999200 | -2.04379900 |
| H | -0.37774200 | -4.86835200 | 0.05709100  |
| H | 1.30401300  | -5.41328900 | 0.09351900  |
| H | 0.64496200  | -4.21829500 | 2.22737400  |
| H | 1.95661700  | -3.38770800 | 1.37681700  |
| H | -1.03072000 | -2.69519200 | 1.35765400  |
| H | 0.27012300  | -1.75793400 | 2.11596600  |
| H | 2.00014300  | -3.39881500 | -1.19663500 |
| N | 0.22504100  | -1.63384700 | 0.03381400  |

<sup>T</sup>TS3a

Gibbs free energy before correction = -1491.77904200

Gibbs free energy after correction = -1491.76820862

|    |             |             |             |
|----|-------------|-------------|-------------|
| Ni | -0.97131800 | -0.06074400 | 0.20401100  |
| C  | 1.88108700  | -1.05616400 | 0.71905100  |
| C  | 1.03947800  | -0.10628000 | 0.04793600  |
| C  | 1.68022400  | 0.62744200  | -1.00388900 |
| C  | 3.02266700  | 0.48708600  | -1.29862700 |
| C  | 3.82435300  | -0.41669100 | -0.58432200 |
| C  | 3.21936000  | -1.19706800 | 0.41948500  |
| H  | 1.45466900  | -1.70434100 | 1.48929200  |
| H  | 1.09411600  | 1.32194900  | -1.61177800 |
| H  | 3.45704700  | 1.06118200  | -2.11788700 |
| H  | 3.81670700  | -1.94617000 | 0.94513200  |
| C  | 5.24780400  | -0.62816100 | -0.89186500 |
| F  | 5.71227900  | 0.19635900  | -1.84544700 |
| F  | 5.52065200  | -1.88791700 | -1.31651400 |
| F  | 6.05273100  | -0.45778900 | 0.18530800  |
| C  | -2.72747800 | -1.95466700 | 1.48093000  |
| C  | -3.71531700 | -3.10878800 | 1.53728500  |
| C  | -3.15761700 | -4.33216500 | 0.81979400  |
| C  | -2.74726800 | -3.97137400 | -0.60310800 |
| C  | -1.78011900 | -2.79846200 | -0.60219600 |
| H  | -3.95331900 | -3.33792500 | 2.58535200  |
| H  | -1.80397300 | -2.21548600 | 2.02565600  |
| H  | -3.13719200 | -1.04593600 | 1.94429800  |
| H  | -2.27488600 | -4.70248300 | 1.36777900  |
| H  | -3.89358700 | -5.14776800 | 0.81686600  |
| H  | -2.28377100 | -4.82874600 | -1.11075300 |
| H  | -3.64107700 | -3.69818200 | -1.18893200 |
| H  | -0.84613600 | -3.07272300 | -0.08498300 |
| H  | -1.50930800 | -2.49392900 | -1.62195100 |
| H  | -4.65706000 | -2.79508400 | 1.05659900  |
| N  | -2.32279100 | -1.61543200 | 0.09837900  |
| H  | -3.16212200 | -1.31286400 | -0.40397800 |
| C  | -3.02083100 | 1.84269600  | -0.64546700 |
| C  | -3.62437000 | 2.86953400  | -1.59131600 |
| C  | -3.86415100 | 2.26060100  | -2.96773800 |
| C  | -2.57876400 | 1.64366600  | -3.50661200 |
| C  | -2.00771900 | 0.64343400  | -2.51374600 |
| H  | -4.55771100 | 3.26092000  | -1.16294400 |
| H  | -3.73508300 | 1.02229800  | -0.46683100 |
| H  | -2.78084300 | 2.28462400  | 0.33192600  |
| H  | -4.63633500 | 1.47667200  | -2.88857300 |
| H  | -4.25271100 | 3.01703200  | -3.66327000 |

|   |             |             |             |
|---|-------------|-------------|-------------|
| H | -2.75197900 | 1.14720200  | -4.47157600 |
| H | -1.83338800 | 2.43693700  | -3.68416500 |
| H | -2.70728300 | -0.19786900 | -2.38455500 |
| H | -1.05260200 | 0.22584800  | -2.86059100 |
| H | -2.93092800 | 3.72236000  | -1.68087900 |
| N | -1.78630400 | 1.23415500  | -1.18045900 |
| H | -1.09679400 | 1.98407000  | -1.28614600 |
| C | 0.72407400  | 2.41875300  | 1.17177000  |
| C | 0.03712100  | 3.39347800  | 2.12371700  |
| C | 0.15689800  | 2.91121600  | 3.56387700  |
| C | -0.32857300 | 1.47215500  | 3.68440800  |
| C | 0.38989700  | 0.58666500  | 2.67243900  |
| H | 0.47235600  | 4.39776600  | 2.00873400  |
| H | 1.82106800  | 2.43614200  | 1.37154400  |
| H | 0.58968700  | 2.75042000  | 0.13243600  |
| H | 1.21634000  | 2.95678300  | 3.86993000  |
| H | -0.39620700 | 3.57184600  | 4.24661700  |
| H | -0.16876600 | 1.08775500  | 4.70304400  |
| H | -1.41356100 | 1.42614800  | 3.48515700  |
| H | 1.47121600  | 0.54085700  | 2.93674200  |
| H | 0.00670800  | -0.44549400 | 2.73416700  |
| H | -1.02822800 | 3.46936000  | 1.84722000  |
| N | 0.21000100  | 1.07704200  | 1.32179700  |

**S7a**

Gibbs free energy before correction = -1491.85227700

Gibbs free energy after correction = -1491.83848674

|    |             |             |             |
|----|-------------|-------------|-------------|
| Ni | -0.52006900 | -0.30455600 | -0.50983300 |
| C  | 0.80886800  | -2.30222000 | 1.21417600  |
| C  | 1.09651400  | -3.72875000 | 1.65549400  |
| C  | 1.68595200  | -4.53422200 | 0.50367300  |
| C  | 0.76351700  | -4.47271200 | -0.70785300 |
| C  | 0.47624100  | -3.02865900 | -1.09025000 |
| H  | 1.77637500  | -3.71729900 | 2.51920100  |
| H  | 1.74661200  | -1.78685800 | 0.95236000  |
| H  | 0.33354200  | -1.71863400 | 2.01596500  |
| H  | 2.66805100  | -4.10969400 | 0.23198700  |
| H  | 1.86397200  | -5.57566000 | 0.80566000  |
| H  | 1.20075900  | -5.00135800 | -1.56670700 |
| H  | -0.18851300 | -4.97820000 | -0.47264600 |
| H  | 1.40426800  | -2.53178700 | -1.41528800 |
| H  | -0.23452400 | -2.96815400 | -1.92595800 |
| H  | 0.15823400  | -4.20042500 | 1.99378800  |
| N  | -0.07045100 | -2.23577400 | 0.02873200  |

|   |             |             |             |
|---|-------------|-------------|-------------|
| H | -0.95473900 | -2.67758400 | 0.29743900  |
| C | -2.94072000 | -0.45723700 | 1.09285300  |
| C | -4.44795900 | -0.36617300 | 1.27576000  |
| C | -5.14984500 | -1.48526000 | 0.51559800  |
| C | -4.73018000 | -1.47661200 | -0.94966500 |
| C | -3.21488100 | -1.53290400 | -1.07736400 |
| H | -4.69526600 | -0.39800900 | 2.34634000  |
| H | -2.55775200 | -1.38978200 | 1.53911400  |
| H | -2.42430700 | 0.37683200  | 1.58876200  |
| H | -4.87537100 | -2.45458700 | 0.96529900  |
| H | -6.24088600 | -1.39319200 | 0.60710200  |
| H | -5.17902400 | -2.31893500 | -1.49490000 |
| H | -5.09397500 | -0.55354300 | -1.43165200 |
| H | -2.84319200 | -2.49372000 | -0.68600300 |
| H | -2.89728000 | -1.46361900 | -2.12636600 |
| H | -4.78966200 | 0.61204200  | 0.89669300  |
| N | -2.54313300 | -0.45511400 | -0.32825100 |
| H | -2.86140900 | 0.43272000  | -0.72124700 |
| C | 3.65250000  | -0.37403200 | -0.75422400 |
| C | 4.54513100  | 0.57653900  | -1.54477300 |
| C | 5.62637700  | 1.16253300  | -0.64010000 |
| C | 5.02448700  | 1.75811000  | 0.62987100  |
| C | 4.12389700  | 0.73641900  | 1.31349900  |
| H | 4.99500000  | 0.04953400  | -2.39831600 |
| H | 4.25639800  | -1.21371000 | -0.37108300 |
| H | 2.86623700  | -0.81438100 | -1.37509400 |
| H | 6.32700500  | 0.35863500  | -0.35652800 |
| H | 6.21562600  | 1.91652300  | -1.18037300 |
| H | 5.81541900  | 2.08674200  | 1.31883200  |
| H | 4.42036400  | 2.64687000  | 0.38233700  |
| H | 4.71309300  | -0.15395100 | 1.58450500  |
| H | 3.70006100  | 1.11977000  | 2.24501400  |
| H | 3.92177600  | 1.38749900  | -1.95681300 |
| N | 3.06813000  | 0.29632300  | 0.40376400  |
| C | 1.03092100  | 0.80406400  | -0.86315600 |
| C | 1.87501700  | 0.99695900  | 0.30155500  |
| C | 1.43525100  | 1.84549900  | 1.31781500  |
| C | 0.22949300  | 2.57762200  | 1.19314500  |
| C | -0.57108200 | 2.46541500  | 0.08881900  |
| C | -0.23291100 | 1.52925200  | -0.96727300 |
| H | 1.52588300  | 0.52563100  | -1.79681300 |
| H | 2.02898000  | 2.00385200  | 2.21376300  |
| H | -0.04215900 | 3.26300100  | 1.99542300  |
| H | -0.61178100 | 1.77024200  | -1.96943800 |

|   |             |            |             |
|---|-------------|------------|-------------|
| C | -1.77646000 | 3.29515600 | -0.07882400 |
| F | -2.90616700 | 2.55516800 | -0.27131900 |
| F | -1.71416900 | 4.09543100 | -1.16861200 |
| F | -2.03838300 | 4.09606700 | 0.96421700  |

### T5a

Gibbs free energy before correction = -1491.80760000

Gibbs free energy after correction = -1491.79676662

|    |             |             |             |
|----|-------------|-------------|-------------|
| Ni | 1.00307300  | -0.04828700 | 0.32413500  |
| C  | -2.16762200 | -1.47458400 | 1.24967500  |
| C  | -1.08080300 | -1.66436100 | 0.37401400  |
| C  | -1.26035000 | -1.27888700 | -1.01309200 |
| C  | -2.47143300 | -0.81244900 | -1.46007500 |
| C  | -3.58957800 | -0.69533400 | -0.59555800 |
| C  | -3.38823100 | -0.99976500 | 0.80615900  |
| H  | -2.06706000 | -1.71358500 | 2.30818100  |
| H  | -0.44018700 | -1.41085600 | -1.72000600 |
| H  | -2.58098700 | -0.54948300 | -2.51350100 |
| H  | -4.22099900 | -0.91105800 | 1.50410700  |
| C  | -4.82449500 | -0.06638400 | -1.01503100 |
| F  | -4.97868100 | -0.00738700 | -2.35476800 |
| F  | -4.99264000 | 1.23845100  | -0.58982700 |
| F  | -5.93989200 | -0.68027200 | -0.52408600 |
| C  | 1.44119300  | 2.15947700  | 2.11006400  |
| C  | 1.29162500  | 3.60826300  | 2.54574600  |
| C  | -0.15911600 | 4.05967900  | 2.42674800  |
| C  | -0.67439500 | 3.81803500  | 1.01315700  |
| C  | -0.47952200 | 2.36596900  | 0.60942400  |
| H  | 1.65891700  | 3.72136900  | 3.57515400  |
| H  | 0.87492800  | 1.49714700  | 2.78611300  |
| H  | 2.49052000  | 1.83458000  | 2.13380400  |
| H  | -0.77613100 | 3.48793100  | 3.14021200  |
| H  | -0.25914100 | 5.11904600  | 2.69980900  |
| H  | -1.73772300 | 4.08164300  | 0.92793000  |
| H  | -0.12696900 | 4.46258000  | 0.30511700  |
| H  | -1.08642400 | 1.70270000  | 1.24973700  |
| H  | -0.78834500 | 2.18772100  | -0.42999400 |
| H  | 1.93008200  | 4.24108400  | 1.90667200  |
| N  | 0.92524800  | 1.91803500  | 0.74443100  |
| H  | 1.49345800  | 2.47067800  | 0.09652400  |
| C  | 3.62298800  | 0.31556000  | -0.97736600 |
| C  | 4.57953100  | 0.25160700  | -2.15837300 |
| C  | 4.05544800  | 1.08391300  | -3.32274500 |
| C  | 2.63484300  | 0.66288700  | -3.68058700 |

|   |             |             |             |
|---|-------------|-------------|-------------|
| C | 1.73392200  | 0.71879700  | -2.45640500 |
| H | 5.57668100  | 0.59223900  | -1.84547000 |
| H | 3.56258700  | 1.34683600  | -0.59255500 |
| H | 3.96401800  | -0.32115500 | -0.14882200 |
| H | 4.05497700  | 2.14875000  | -3.03440700 |
| H | 4.71878700  | 0.99321400  | -4.19380100 |
| H | 2.22097300  | 1.30217500  | -4.47310600 |
| H | 2.64169000  | -0.36806700 | -4.07254500 |
| H | 1.65269400  | 1.75728100  | -2.09653400 |
| H | 0.71555000  | 0.37571800  | -2.68557000 |
| H | 4.68542100  | -0.80037700 | -2.47322800 |
| N | 2.24893400  | -0.09152500 | -1.33416100 |
| H | 2.29003100  | -1.06367100 | -1.65463600 |
| C | 0.86576500  | -3.11325500 | 0.20375300  |
| C | 2.33118800  | -3.29404500 | 0.55167300  |
| C | 2.53066400  | -3.33429400 | 2.05965300  |
| C | 1.89003700  | -2.11300800 | 2.70245800  |
| C | 0.43541800  | -1.97686900 | 2.28902800  |
| H | 2.69605400  | -4.21698200 | 0.08004200  |
| H | 0.27844700  | -3.98549100 | 0.55264100  |
| H | 0.73026000  | -3.04108600 | -0.88220900 |
| H | 2.05553200  | -4.24427100 | 2.46286500  |
| H | 3.59802900  | -3.39384400 | 2.31279500  |
| H | 1.94075700  | -2.17251900 | 3.79871700  |
| H | 2.43579500  | -1.20045600 | 2.40406400  |
| H | -0.14305500 | -2.84231000 | 2.66900900  |
| H | -0.00494200 | -1.06676300 | 2.72186800  |
| H | 2.91300300  | -2.46275200 | 0.12011900  |
| N | 0.29227200  | -1.89633500 | 0.82249300  |

### 1b

Gibbs free energy before correction = -3244.16526600

Gibbs free energy after correction = -3244.15147570

|    |             |             |             |
|----|-------------|-------------|-------------|
| Ni | 0.37782200  | -0.92822000 | -0.01145900 |
| Br | 2.36682300  | -2.11975000 | 0.02561900  |
| C  | -2.15319000 | 0.01161700  | -1.18857000 |
| C  | -3.65974900 | -0.09580400 | -1.35984400 |
| C  | -4.36932100 | 0.11213200  | -0.02743200 |
| C  | -3.82681100 | -0.85729900 | 1.01557100  |
| C  | -2.31622100 | -0.73246800 | 1.13303900  |
| H  | -3.99660700 | 0.63625200  | -2.10711800 |
| H  | -1.87986400 | 1.02820700  | -0.86623600 |
| H  | -1.62314700 | -0.18841700 | -2.12890000 |
| H  | -4.19887500 | 1.14661700  | 0.31607000  |



|   |             |             |             |
|---|-------------|-------------|-------------|
| H | -5.45527800 | -0.00840700 | -0.14222800 |
| H | -4.28653700 | -0.68126700 | 1.99817700  |
| H | -4.07915900 | -1.89127100 | 0.72592200  |
| H | -2.04333200 | 0.26827300  | 1.49973800  |
| H | -1.90456600 | -1.46477700 | 1.83918300  |
| H | -3.90546300 | -1.09465100 | -1.75782400 |
| N | -1.63019800 | -0.92118100 | -0.16591700 |
| H | -1.86544600 | -1.86643400 | -0.48509700 |
| C | 0.23746200  | 1.92237500  | 1.12613300  |
| C | 0.90190900  | 3.27900300  | 1.30416500  |
| C | 1.11938900  | 3.95337500  | -0.04529700 |
| C | 1.89627200  | 3.03227600  | -0.97854400 |
| C | 1.20528200  | 1.68276800  | -1.09838600 |
| H | 0.28871800  | 3.90682200  | 1.96606300  |
| H | -0.77239900 | 2.04970800  | 0.70411200  |
| H | 0.12853500  | 1.39894100  | 2.08568900  |
| H | 0.13944400  | 4.18330100  | -0.49708900 |
| H | 1.64261300  | 4.91153200  | 0.07936100  |
| H | 2.00716500  | 3.48088800  | -1.97578100 |
| H | 2.91399300  | 2.87831700  | -0.58211600 |
| H | 0.21782300  | 1.80292700  | -1.57119100 |
| H | 1.78426700  | 0.98567200  | -1.71942100 |
| H | 1.87325300  | 3.13733600  | 1.80713600  |
| N | 0.98437800  | 1.03993200  | 0.21210900  |
| H | 1.90763300  | 0.88274400  | 0.62740400  |

## 2b

Gibbs free energy before correction = -6384.06552600

Gibbs free energy after correction = -6384.05173565

|    |             |             |             |
|----|-------------|-------------|-------------|
| Ni | -1.26271900 | -0.02371700 | -0.65411000 |
| Br | -1.53287500 | -1.70097500 | -2.25271900 |
| C  | -0.17390100 | 2.31829100  | 0.93933600  |
| C  | 0.99086600  | 3.23556900  | 1.27667600  |
| C  | 1.48045500  | 3.96744800  | 0.03285900  |
| C  | 1.81751300  | 2.97080900  | -1.06965700 |
| C  | 0.63448600  | 2.05872800  | -1.35117600 |
| H  | 0.68805800  | 3.94366600  | 2.06084200  |
| H  | -1.03999100 | 2.90932300  | 0.60113500  |
| H  | -0.49255100 | 1.74132600  | 1.81945600  |
| H  | 0.68765700  | 4.64695600  | -0.32316700 |
| H  | 2.35139800  | 4.59392600  | 0.26957900  |
| H  | 2.11338400  | 3.48687200  | -1.99378500 |
| H  | 2.67836900  | 2.35280500  | -0.76017600 |
| H  | -0.21364300 | 2.63549000  | -1.75333000 |

|    |             |             |             |
|----|-------------|-------------|-------------|
| H  | 0.88793800  | 1.28761100  | -2.09278300 |
| H  | 1.81187800  | 2.62744500  | 1.69484100  |
| N  | 0.15233200  | 1.36348600  | -0.13708900 |
| H  | 0.93991900  | 0.80317400  | 0.20206800  |
| C  | -3.82283600 | -0.50618700 | 0.68833900  |
| C  | -5.11163700 | -0.06191900 | 1.36108100  |
| C  | -5.84057900 | 0.96399100  | 0.50172600  |
| C  | -4.91409000 | 2.12666500  | 0.16738700  |
| C  | -3.63011900 | 1.62266000  | -0.47298000 |
| H  | -5.74675500 | -0.93804100 | 1.55479900  |
| H  | -4.03487200 | -1.02837700 | -0.25751700 |
| H  | -3.25810100 | -1.20557400 | 1.31901100  |
| H  | -6.16907700 | 0.48280500  | -0.43497700 |
| H  | -6.74737200 | 1.32237800  | 1.00819700  |
| H  | -5.40497600 | 2.84349400  | -0.50596300 |
| H  | -4.66153600 | 2.67608000  | 1.09008700  |
| H  | -3.84687800 | 1.13578200  | -1.43759300 |
| H  | -2.93107500 | 2.44641500  | -0.67516800 |
| H  | -4.87118200 | 0.38161500  | 2.34209500  |
| N  | -2.92956300 | 0.62174900  | 0.35740600  |
| H  | -2.66572000 | 1.07639800  | 1.23600000  |
| C  | 2.10728300  | -0.74214900 | 2.02737600  |
| C  | 1.25382100  | -1.43658400 | 1.17513900  |
| C  | 1.59798200  | -1.71947700 | -0.14165800 |
| C  | 2.82869000  | -1.28140500 | -0.62067400 |
| C  | 3.69194900  | -0.58421000 | 0.21890800  |
| C  | 3.33572500  | -0.31496400 | 1.54006200  |
| H  | 1.81574300  | -0.52598700 | 3.05295200  |
| H  | 0.89313600  | -2.22287600 | -0.80235200 |
| H  | 3.10565000  | -1.48349800 | -1.65272000 |
| H  | 4.01534000  | 0.23475500  | 2.19001100  |
| Br | -0.45945300 | -1.95018800 | 1.80771800  |
| C  | 5.00700200  | -0.06997900 | -0.27120100 |
| F  | 6.02174200  | -0.48970500 | 0.49893500  |
| F  | 5.04786700  | 1.27433100  | -0.24305000 |
| F  | 5.27570200  | -0.44568900 | -1.52398700 |

### TS1b

Gibbs free energy before correction = -6384.04457500

Gibbs free energy after correction = -6384.03078465

|    |            |             |             |
|----|------------|-------------|-------------|
| Ni | 0.74122100 | -0.00025500 | -0.00424300 |
| Br | 0.16381400 | -0.00085100 | 2.36141600  |
| C  | 1.50990500 | 2.95192300  | -0.97903400 |
| C  | 2.08459800 | 4.30342700  | -0.58516100 |
| C  | 3.48435900 | 4.14650300  | -0.00525400 |

|    |             |             |             |
|----|-------------|-------------|-------------|
| C  | 3.46513600  | 3.14697800  | 1.14307500  |
| C  | 2.83315700  | 1.83310200  | 0.71229100  |
| H  | 2.09145400  | 4.96625500  | -1.46184500 |
| H  | 2.12417900  | 2.49053000  | -1.76641500 |
| H  | 0.49709800  | 3.05842200  | -1.38665000 |
| H  | 4.16350600  | 3.78089400  | -0.79370700 |
| H  | 3.87911500  | 5.11576300  | 0.32914000  |
| H  | 4.47881500  | 2.95717800  | 1.52309800  |
| H  | 2.88095700  | 3.55849300  | 1.98339800  |
| H  | 3.43793600  | 1.35075200  | -0.07418700 |
| H  | 2.76280900  | 1.13700100  | 1.55775800  |
| H  | 1.42214500  | 4.77014200  | 0.16300100  |
| N  | 1.47375000  | 2.00468400  | 0.15193400  |
| H  | 0.88035400  | 2.40194300  | 0.88689700  |
| C  | 2.81506000  | -1.86237500 | 0.69047300  |
| C  | 3.42938100  | -3.18341500 | 1.12509100  |
| C  | 3.41492800  | -4.19382800 | -0.01387600 |
| C  | 2.00522200  | -4.33009200 | -0.57478300 |
| C  | 1.45055100  | -2.97173400 | -0.97347000 |
| H  | 4.45146700  | -3.00857100 | 1.48946500  |
| H  | 3.41740100  | -1.39837200 | -0.10882500 |
| H  | 2.76958900  | -1.15706900 | 1.53009300  |
| H  | 4.09046000  | -3.84840200 | -0.81443200 |
| H  | 3.79607800  | -5.16706300 | 0.32479100  |
| H  | 1.98894200  | -5.00081600 | -1.44528000 |
| H  | 1.34366800  | -4.77765300 | 0.18577500  |
| H  | 2.06333500  | -2.52779300 | -1.77193400 |
| H  | 0.43118400  | -3.06306500 | -1.36802800 |
| H  | 2.84952600  | -3.57631600 | 1.97723700  |
| N  | 1.44527600  | -2.01546500 | 0.15033200  |
| H  | 0.85599500  | -2.39766500 | 0.89651700  |
| C  | -1.74760100 | 1.24176800  | -0.65091600 |
| C  | -1.09106800 | 0.01968000  | -0.75547900 |
| C  | -1.77468300 | -1.19029400 | -0.64658200 |
| C  | -3.11781100 | -1.16618100 | -0.30464200 |
| C  | -3.77506900 | 0.05233400  | -0.12656000 |
| C  | -3.09449000 | 1.25268400  | -0.30791500 |
| H  | -1.21684700 | 2.18152700  | -0.78244700 |
| H  | -1.26398000 | -2.14169100 | -0.77325900 |
| H  | -3.66080400 | -2.10227600 | -0.17487400 |
| H  | -3.60888700 | 2.20308900  | -0.18282300 |
| Br | 0.57811800  | -0.00211400 | -2.35827400 |
| C  | -5.21897400 | 0.02268900  | 0.24393400  |
| F  | -5.74163600 | 1.24413400  | 0.39545300  |

|   |             |             |             |
|---|-------------|-------------|-------------|
| F | -5.42136800 | -0.63907900 | 1.39677200  |
| F | -5.96100600 | -0.61148300 | -0.68074000 |

### 3b

Gibbs free energy before correction = -6384.05184500

Gibbs free energy after correction = -6384.03805465

|    |             |             |             |
|----|-------------|-------------|-------------|
| Ni | -0.73620000 | 0.00108200  | 0.06100500  |
| Br | -0.54539100 | 0.00252900  | 2.40929400  |
| C  | -1.25985500 | -3.00500400 | -0.91695500 |
| C  | -1.87302100 | -4.35882200 | -0.59882300 |
| C  | -3.37109300 | -4.22401200 | -0.35694800 |
| C  | -3.63805200 | -3.18520000 | 0.72414900  |
| C  | -2.96030600 | -1.86497400 | 0.39119300  |
| H  | -1.66707600 | -5.05447800 | -1.42436400 |
| H  | -1.68882200 | -2.59196900 | -1.83983600 |
| H  | -0.17665700 | -3.07816900 | -1.07656700 |
| H  | -3.86007200 | -3.90722600 | -1.29342700 |
| H  | -3.81093700 | -5.19210200 | -0.08064600 |
| H  | -4.71584900 | -3.01743300 | 0.85785000  |
| H  | -3.24833200 | -3.54691000 | 1.69051400  |
| H  | -3.38982100 | -1.42771800 | -0.52488600 |
| H  | -3.10010300 | -1.13973800 | 1.20371000  |
| H  | -1.38616000 | -4.77487600 | 0.29918400  |
| N  | -1.50635500 | -2.01845400 | 0.15413300  |
| H  | -1.09275400 | -2.38352000 | 1.01753700  |
| C  | -2.93036100 | 1.89499400  | 0.39231900  |
| C  | -3.59282400 | 3.22277600  | 0.72587900  |
| C  | -3.31556600 | 4.25797500  | -0.35606900 |
| C  | -1.81632200 | 4.37596300  | -0.59944900 |
| C  | -1.21833500 | 3.01532100  | -0.91785400 |
| H  | -4.67224400 | 3.06706700  | 0.86104500  |
| H  | -3.36623200 | 1.46257200  | -0.52308100 |
| H  | -3.07748000 | 1.17156800  | 1.20515300  |
| H  | -3.80909000 | 3.94613200  | -1.29182500 |
| H  | -3.74427400 | 5.23105800  | -0.07982000 |
| H  | -1.60345500 | 5.06904400  | -1.42539500 |
| H  | -1.32406000 | 4.78687700  | 0.29796500  |
| H  | -1.65219000 | 2.60712300  | -1.84058000 |
| H  | -0.13442400 | 3.07643000  | -1.07797000 |
| H  | -3.19776200 | 3.58042600  | 1.69158800  |
| N  | -1.47523500 | 2.03155800  | 0.15324400  |
| H  | -1.05565100 | 2.39095200  | 1.01609700  |
| C  | 1.84732800  | -1.23670600 | 0.07645000  |
| C  | 1.19009100  | -0.01914300 | 0.06436600  |

|    |             |             |             |
|----|-------------|-------------|-------------|
| C  | 1.87274500  | 1.18796700  | 0.06745800  |
| C  | 3.26263500  | 1.16788800  | 0.05059400  |
| C  | 3.94314800  | -0.04958700 | 0.04140000  |
| C  | 3.24090000  | -1.24982600 | 0.05953800  |
| H  | 1.30313000  | -2.17858300 | 0.11504200  |
| H  | 1.34751900  | 2.14090000  | 0.09926900  |
| H  | 3.81953800  | 2.10492300  | 0.04954700  |
| H  | 3.77138200  | -2.19966400 | 0.06553800  |
| Br | -0.66117100 | 0.00083900  | -2.26453300 |
| C  | 5.43398200  | -0.01925100 | 0.01010600  |
| F  | 5.98067700  | -1.23916300 | 0.05434100  |
| F  | 5.94121600  | 0.67811000  | 1.04118800  |
| F  | 5.89540700  | 0.57830400  | -1.10243800 |

#### 4b

Gibbs free energy before correction = -6384.05348900

Gibbs free energy after correction = -6384.03969865

|    |             |             |             |
|----|-------------|-------------|-------------|
| Ni | 0.98263400  | 0.00014600  | 0.04735900  |
| Br | 1.62426000  | 0.00021300  | 2.49358200  |
| C  | 0.18728400  | 2.77230900  | -0.85063300 |
| C  | 0.24269400  | 4.25859900  | -0.53311900 |
| C  | 1.67635500  | 4.76130900  | -0.45092300 |
| C  | 2.46317200  | 3.91997600  | 0.54325000  |
| C  | 2.37912300  | 2.44781300  | 0.17918700  |
| H  | -0.32763600 | 4.80001500  | -1.30020300 |
| H  | 0.61415800  | 2.55084600  | -1.83792700 |
| H  | -0.84666000 | 2.41393300  | -0.84060100 |
| H  | 2.14887300  | 4.68272900  | -1.44392000 |
| H  | 1.69841300  | 5.82237600  | -0.16824800 |
| H  | 3.52113400  | 4.21435000  | 0.56921200  |
| H  | 2.06454500  | 4.06543400  | 1.56114800  |
| H  | 2.79825000  | 2.26146600  | -0.81767700 |
| H  | 2.91422700  | 1.82074200  | 0.90098500  |
| H  | -0.26767200 | 4.43581300  | 0.42808900  |
| N  | 0.96431800  | 1.98039800  | 0.13477900  |
| H  | 0.55582300  | 2.14342000  | 1.06229400  |
| C  | 2.38053700  | -2.44667400 | 0.17867300  |
| C  | 2.46562900  | -3.91885200 | 0.54247000  |
| C  | 1.67889800  | -4.76045800 | -0.45153600 |
| C  | 0.24487700  | -4.25864300 | -0.53296400 |
| C  | 0.18833700  | -2.77233300 | -0.85017400 |
| H  | 3.52378500  | -4.21257500 | 0.56791200  |
| H  | 2.79915800  | -2.25994000 | -0.81832400 |
| H  | 2.91553200  | -1.81938700 | 0.90037000  |

|    |             |             |             |
|----|-------------|-------------|-------------|
| H  | 2.15092300  | -4.68135100 | -1.44472300 |
| H  | 1.70174900  | -5.82157500 | -0.16910800 |
| H  | -0.32545600 | -4.80029900 | -1.29987900 |
| H  | -0.26490500 | -4.43637900 | 0.42845300  |
| H  | 0.61451000  | -2.55042700 | -1.83767500 |
| H  | -0.84582700 | -2.41461000 | -0.83944400 |
| H  | 2.06752100  | -4.06472100 | 1.56050800  |
| N  | 0.96544200  | -1.98008400 | 0.13491500  |
| H  | 0.55749600  | -2.14331200 | 1.06263600  |
| C  | -1.59849700 | -0.00007200 | -1.10484400 |
| C  | -0.92949700 | -0.00034700 | 0.11631600  |
| C  | -1.61243400 | -0.00123000 | 1.32114200  |
| C  | -3.00910200 | -0.00160900 | 1.30724300  |
| C  | -3.68863500 | -0.00117700 | 0.09615000  |
| C  | -2.98773400 | -0.00044500 | -1.11098400 |
| H  | -1.04438900 | 0.00045900  | -2.04304200 |
| H  | -1.07455700 | -0.00149000 | 2.26736000  |
| H  | -3.55648400 | -0.00219600 | 2.24751500  |
| H  | -3.52827100 | -0.00015300 | -2.05744100 |
| Br | 1.87465800  | 0.00045200  | -2.22561900 |
| C  | -5.18078500 | -0.00083500 | 0.03928800  |
| F  | -5.65153200 | -1.07297500 | -0.61924600 |
| F  | -5.65096400 | 1.07383400  | -0.61555900 |
| F  | -5.74747500 | -0.00271700 | 1.25012600  |

### 5b

Gibbs free energy before correction = -6728.98735700

Gibbs free energy after correction = -6728.97356665

|    |             |             |             |
|----|-------------|-------------|-------------|
| Ni | -0.03104000 | 0.41052200  | 0.03385300  |
| Br | 0.68043300  | 0.67206700  | 2.43454100  |
| C  | 0.34659000  | -2.25747700 | -1.29085400 |
| C  | 1.12730800  | -3.56317000 | -1.31403200 |
| C  | 0.76164200  | -4.45059100 | -0.13527000 |
| C  | 0.93713400  | -3.67018500 | 1.15735000  |
| C  | 0.15400000  | -2.36813700 | 1.12287900  |
| H  | 0.93272800  | -4.06622900 | -2.27156000 |
| H  | -0.73068100 | -2.46068000 | -1.37804500 |
| H  | 0.63920100  | -1.60491800 | -2.11794300 |
| H  | -0.29034400 | -4.76771700 | -0.22859400 |
| H  | 1.37123400  | -5.36447400 | -0.12952700 |
| H  | 0.60337200  | -4.25323500 | 2.02712400  |
| H  | 2.00508800  | -3.44560400 | 1.31753400  |
| H  | -0.92119400 | -2.57289100 | 1.01556400  |
| H  | 0.30287600  | -1.79258400 | 2.03967400  |

|    |             |             |             |
|----|-------------|-------------|-------------|
| H  | 2.20683500  | -3.33918500 | -1.28725500 |
| N  | 0.55319700  | -1.51058700 | -0.02404100 |
| H  | 1.57806700  | -1.30674200 | 0.05378400  |
| C  | -1.78491900 | 2.76435600  | -0.75005800 |
| C  | -2.28625600 | 4.14851600  | -0.36708000 |
| C  | -1.14857400 | 5.15472200  | -0.27972300 |
| C  | -0.07138600 | 4.63469600  | 0.66057100  |
| C  | 0.39607600  | 3.25634700  | 0.22725000  |
| H  | -3.04191800 | 4.46168400  | -1.10048500 |
| H  | -1.33731600 | 2.75713000  | -1.75318500 |
| H  | -2.60924100 | 2.04425800  | -0.74292800 |
| H  | -0.71309400 | 5.30159200  | -1.28195500 |
| H  | -1.52117600 | 6.13271800  | 0.05378100  |
| H  | 0.79668100  | 5.30761200  | 0.68641400  |
| H  | -0.46318500 | 4.57899700  | 1.69034500  |
| H  | 0.82034800  | 3.28030800  | -0.78391900 |
| H  | 1.15424800  | 2.85401500  | 0.90701000  |
| H  | -2.79732000 | 4.08210400  | 0.60787800  |
| N  | -0.73662300 | 2.28780100  | 0.18650400  |
| H  | -1.14817300 | 2.26305100  | 1.12637900  |
| C  | -2.42766800 | -0.50947200 | -1.15577800 |
| C  | -1.83195700 | -0.20340800 | 0.06193600  |
| C  | -2.53296300 | -0.25806100 | 1.25637100  |
| C  | -3.87779900 | -0.62796300 | 1.23192100  |
| C  | -4.48827900 | -0.93606400 | 0.02138400  |
| C  | -3.76710200 | -0.88303000 | -1.17161400 |
| H  | -1.87017400 | -0.43641900 | -2.08883800 |
| H  | -2.04672000 | -0.01734800 | 2.20088200  |
| H  | -4.44173600 | -0.67033100 | 2.16146600  |
| H  | -4.25425200 | -1.12322800 | -2.11656600 |
| Br | 0.88456100  | 0.93121700  | -2.19749700 |
| C  | -5.92281900 | -1.34528800 | -0.04352900 |
| F  | -6.54020600 | -1.26354800 | 1.13951600  |
| F  | -6.05920100 | -2.61142600 | -0.47266300 |
| F  | -6.61706000 | -0.58342100 | -0.90496800 |
| C  | 5.54604400  | -0.65083400 | -1.39282600 |
| C  | 4.06375900  | -1.09056600 | -1.34030300 |
| H  | 5.69235700  | 0.17629100  | -2.10222600 |
| H  | 6.19738400  | -1.47786900 | -1.70988900 |
| H  | 3.43578900  | -0.53982100 | -2.05540500 |
| H  | 3.95977600  | -2.16416400 | -1.55708500 |
| C  | 5.17809700  | 0.95921700  | 0.32274900  |
| H  | 5.50633700  | 1.27833000  | 1.32261100  |
| H  | 5.39046500  | 1.78414200  | -0.37262200 |

|   |            |             |             |
|---|------------|-------------|-------------|
| C | 3.67855800 | 0.58813300  | 0.31517400  |
| H | 3.19229700 | 0.77133600  | 1.28260200  |
| H | 3.11311600 | 1.14598100  | -0.44521100 |
| C | 4.27213400 | -1.63186200 | 0.97988600  |
| H | 3.85253500 | -1.42101400 | 1.97522900  |
| H | 4.10398700 | -2.69823500 | 0.76640700  |
| C | 5.77588500 | -1.27259500 | 0.89863500  |
| H | 6.16072900 | -0.94015600 | 1.87321400  |
| H | 6.37552100 | -2.13844200 | 0.58352100  |
| N | 3.51438600 | -0.84248000 | 0.00091800  |
| N | 5.99090500 | -0.19558400 | -0.07192500 |

### TS2b

Gibbs free energy before correction = -6728.97118500

Gibbs free energy after correction = -6728.95739465

|    |             |             |             |
|----|-------------|-------------|-------------|
| Ni | 0.06050400  | 0.37379400  | 0.06386600  |
| Br | 0.66280400  | 0.77521200  | 2.53225800  |
| C  | 0.40889900  | -2.25504400 | -1.18012800 |
| C  | 1.11784900  | -3.60605300 | -1.21085800 |
| C  | 0.73808000  | -4.44638900 | -0.00384500 |
| C  | 1.01452400  | -3.64890600 | 1.25877900  |
| C  | 0.33201400  | -2.28630800 | 1.21257500  |
| H  | 0.85598900  | -4.11258500 | -2.15123200 |
| H  | -0.67836500 | -2.44423500 | -1.23707500 |
| H  | 0.68061400  | -1.65210100 | -2.05274000 |
| H  | -0.33663700 | -4.69046800 | -0.05361200 |
| H  | 1.28272000  | -5.40114500 | 0.00223400  |
| H  | 0.65724300  | -4.17945500 | 2.15355500  |
| H  | 2.10044400  | -3.51993800 | 1.38508300  |
| H  | -0.76069100 | -2.45268100 | 1.20178000  |
| H  | 0.56491300  | -1.71060600 | 2.11255200  |
| H  | 2.21011300  | -3.45915400 | -1.22568500 |
| N  | 0.71254300  | -1.47922600 | 0.03595000  |
| H  | 2.13696200  | -1.15462100 | 0.01865200  |
| C  | -1.74921600 | 2.74593800  | -0.69571700 |
| C  | -2.24190200 | 4.13677300  | -0.32596300 |
| C  | -1.10545700 | 5.14858500  | -0.31235600 |
| C  | 0.01318200  | 4.65613200  | 0.59464400  |
| C  | 0.46537400  | 3.26709700  | 0.17845300  |
| H  | -3.03142100 | 4.43244900  | -1.03076600 |
| H  | -1.35318500 | 2.71583800  | -1.72049200 |
| H  | -2.56763600 | 2.02064700  | -0.63235700 |
| H  | -0.71309400 | 5.27020700  | -1.33583600 |
| H  | -1.46706800 | 6.13458100  | 0.01024500  |



|    |             |             |             |
|----|-------------|-------------|-------------|
| H  | 0.87670900  | 5.33532900  | 0.56846000  |
| H  | -0.33687900 | 4.62461400  | 1.64072500  |
| H  | 0.85979700  | 3.27017400  | -0.84576800 |
| H  | 1.24710900  | 2.88471900  | 0.84431700  |
| H  | -2.70754700 | 4.09301700  | 0.67301000  |
| N  | -0.65679400 | 2.29346200  | 0.19552500  |
| H  | -1.02153400 | 2.27498300  | 1.15398200  |
| C  | -2.34279200 | -0.54274900 | -1.17494300 |
| C  | -1.73199200 | -0.26816400 | 0.04529900  |
| C  | -2.44783300 | -0.32904400 | 1.23374400  |
| C  | -3.79945100 | -0.67125500 | 1.20463100  |
| C  | -4.41531800 | -0.94816400 | -0.01122100 |
| C  | -3.68905600 | -0.88868500 | -1.20125600 |
| H  | -1.78193500 | -0.46329600 | -2.10578900 |
| H  | -1.95964400 | -0.10522100 | 2.18237600  |
| H  | -4.36631800 | -0.71682800 | 2.13251600  |
| H  | -4.17989600 | -1.10271400 | -2.15089600 |
| Br | 0.84185100  | 0.90686700  | -2.25960200 |
| C  | -5.85429800 | -1.33508300 | -0.08356900 |
| F  | -6.47591700 | -1.25198600 | 1.09792400  |
| F  | -6.00937000 | -2.59746700 | -0.52024700 |
| F  | -6.53703500 | -0.55956800 | -0.94311300 |
| C  | 5.28007900  | -0.57053900 | -1.49555400 |
| C  | 3.83590700  | -1.10460500 | -1.41792000 |
| H  | 5.33027500  | 0.33001000  | -2.12182700 |
| H  | 5.94502200  | -1.32315300 | -1.93833000 |
| H  | 3.14912900  | -0.59722800 | -2.10644400 |
| H  | 3.78809900  | -2.18481600 | -1.60078300 |
| C  | 4.99401300  | 0.89891000  | 0.35381700  |
| H  | 5.31197700  | 1.08862900  | 1.38755700  |
| H  | 5.22116600  | 1.79643200  | -0.23597400 |
| C  | 3.48931700  | 0.58080800  | 0.29178900  |
| H  | 2.96658300  | 0.75491100  | 1.23981800  |
| H  | 2.96693700  | 1.13672900  | -0.49714500 |
| C  | 4.10046900  | -1.68182700 | 0.92292300  |
| H  | 3.73995800  | -1.42950800 | 1.92902500  |
| H  | 3.87574600  | -2.73662400 | 0.72681100  |
| C  | 5.59923900  | -1.36806700 | 0.72839600  |
| H  | 6.07458900  | -1.14500300 | 1.69198300  |
| H  | 6.12125000  | -2.22775900 | 0.28829700  |
| N  | 3.31905600  | -0.86479500 | -0.04104500 |
| N  | 5.77841600  | -0.22259600 | -0.16368800 |

6b

Gibbs free energy before correction = -6728.97414700

Gibbs free energy after correction = -6728.96035665

|    |             |             |             |
|----|-------------|-------------|-------------|
| Ni | 0.01642700  | 0.31125400  | 0.07660000  |
| Br | 0.71930600  | 0.66232300  | 2.52824300  |
| C  | 0.29113500  | -2.30927200 | -1.18538700 |
| C  | 1.11387600  | -3.59765900 | -1.20868300 |
| C  | 0.79511500  | -4.47248300 | -0.00718300 |
| C  | 0.93832600  | -3.65591900 | 1.26690200  |
| C  | 0.12013100  | -2.37096700 | 1.18019400  |
| H  | 0.91683100  | -4.12692300 | -2.15265500 |
| H  | -0.77904400 | -2.58723100 | -1.27044300 |
| H  | 0.53977800  | -1.68320400 | -2.04908800 |
| H  | -0.24438100 | -4.83295300 | -0.08824600 |
| H  | 1.43874700  | -5.36360800 | 0.01525400  |
| H  | 0.60788300  | -4.22816300 | 2.14641500  |
| H  | 1.99776300  | -3.40152100 | 1.43463000  |
| H  | -0.94871400 | -2.65127900 | 1.08870400  |
| H  | 0.23508900  | -1.78792600 | 2.09849400  |
| H  | 2.18730100  | -3.34559300 | -1.20442800 |
| N  | 0.53510400  | -1.54789500 | 0.03996700  |
| H  | 2.38666600  | -1.07823800 | 0.00338100  |
| C  | -1.69322900 | 2.76028900  | -0.66670300 |
| C  | -2.15780500 | 4.16611800  | -0.31865500 |
| C  | -0.99570000 | 5.14888700  | -0.30294500 |
| C  | 0.09818300  | 4.63895000  | 0.62461200  |
| C  | 0.52019700  | 3.23332400  | 0.23239600  |
| H  | -2.93149300 | 4.47522800  | -1.03551600 |
| H  | -1.28982400 | 2.71218500  | -1.68851700 |
| H  | -2.52846600 | 2.05311300  | -0.60679200 |
| H  | -0.58748400 | 5.24659600  | -1.32298300 |
| H  | -1.33537100 | 6.14846900  | 0.00168900  |
| H  | 0.97769000  | 5.29787500  | 0.60344900  |
| H  | -0.26835600 | 4.62950500  | 1.66556000  |
| H  | 0.93775800  | 3.21648100  | -0.78328100 |
| H  | 1.27738200  | 2.83716600  | 0.91875400  |
| H  | -2.63538800 | 4.14658700  | 0.67555800  |
| N  | -0.61994500 | 2.28538500  | 0.23329000  |
| H  | -0.99504100 | 2.26616700  | 1.18736000  |
| C  | -2.41054500 | -0.55615200 | -1.17945200 |
| C  | -1.78861100 | -0.29141500 | 0.03866000  |
| C  | -2.51789800 | -0.31303200 | 1.22257000  |
| C  | -3.88197800 | -0.59915000 | 1.19223300  |
| C  | -4.50378000 | -0.86452800 | -0.02377300 |
| C  | -3.76975800 | -0.84527000 | -1.21071700 |

|    |             |             |             |
|----|-------------|-------------|-------------|
| H  | -1.84271200 | -0.51588900 | -2.10905800 |
| H  | -2.02627900 | -0.10105500 | 2.17281500  |
| H  | -4.45503300 | -0.61256600 | 2.11749000  |
| H  | -4.26548800 | -1.05055500 | -2.16000500 |
| Br | 0.87321400  | 0.85865900  | -2.23574200 |
| C  | -5.95512600 | -1.19760500 | -0.09999400 |
| F  | -6.57521400 | -1.10305100 | 1.08181000  |
| F  | -6.15595800 | -2.45007600 | -0.54794900 |
| F  | -6.61047700 | -0.39126200 | -0.95329600 |
| C  | 5.34874200  | -0.50401000 | -1.52029800 |
| C  | 3.91691100  | -1.06526000 | -1.44475600 |
| H  | 5.37740100  | 0.40717600  | -2.13121200 |
| H  | 6.01927100  | -1.23937800 | -1.98133000 |
| H  | 3.20887300  | -0.57487700 | -2.12336100 |
| H  | 3.88258800  | -2.14855000 | -1.60713800 |
| C  | 5.07036600  | 0.94644500  | 0.34970000  |
| H  | 5.38301600  | 1.11389600  | 1.38826200  |
| H  | 5.30271600  | 1.85349500  | -0.22181900 |
| C  | 3.56580800  | 0.64355700  | 0.27433000  |
| H  | 3.02534300  | 0.80860600  | 1.21416200  |
| H  | 3.04595400  | 1.18330600  | -0.52672000 |
| C  | 4.19076700  | -1.63800200 | 0.91899900  |
| H  | 3.83559200  | -1.36457600 | 1.91997700  |
| H  | 3.94463500  | -2.68884700 | 0.73022700  |
| C  | 5.68408500  | -1.32735800 | 0.69527100  |
| H  | 6.17606800  | -1.12024700 | 1.65321400  |
| H  | 6.19119700  | -2.18394500 | 0.23388400  |
| N  | 3.41310800  | -0.81418200 | -0.05605000 |
| N  | 5.84872400  | -0.17125000 | -0.18549500 |

## 7b

Gibbs free energy before correction = -3811.85917000

Gibbs free energy after correction = -3811.84537997

|    |            |             |             |
|----|------------|-------------|-------------|
| Ni | 0.95526800 | -0.00423400 | -0.00264800 |
| C  | 1.05721900 | -2.59005400 | -1.22009400 |
| C  | 2.30774200 | -3.47161600 | -1.25506800 |
| C  | 2.38767500 | -4.33739900 | -0.00585200 |
| C  | 2.31352500 | -3.47179400 | 1.24384600  |
| C  | 1.06227900 | -2.59111800 | 1.21447000  |
| H  | 2.28729500 | -4.08140200 | -2.16814800 |
| H  | 0.15325500 | -3.22809400 | -1.25957600 |
| H  | 1.02780800 | -1.90464800 | -2.07655900 |
| H  | 1.55228300 | -5.05745100 | -0.00392700 |
| H  | 3.31499900 | -4.92667100 | -0.00806600 |

|    |             |             |             |
|----|-------------|-------------|-------------|
| H  | 2.29736300  | -4.08172800 | 2.15692700  |
| H  | 3.19199900  | -2.81099500 | 1.29585600  |
| H  | 0.15938500  | -3.23046200 | 1.25666800  |
| H  | 1.03472400  | -1.90622400 | 2.07143900  |
| H  | 3.18625600  | -2.81118200 | -1.31103600 |
| N  | 1.01284800  | -1.81880600 | -0.00234000 |
| C  | 1.30012800  | 2.58368500  | -1.22503800 |
| C  | 1.03540100  | 4.07979600  | -1.24370800 |
| C  | 1.58758000  | 4.74128600  | 0.01313600  |
| C  | 1.01749000  | 4.07083200  | 1.25713500  |
| C  | 1.28210300  | 2.57480100  | 1.23128500  |
| H  | 1.48150700  | 4.51400000  | -2.14910200 |
| H  | 2.37650800  | 2.36661400  | -1.23754600 |
| H  | 0.84853300  | 2.07898000  | -2.09025000 |
| H  | 2.68624800  | 4.64479600  | 0.02065100  |
| H  | 1.36267600  | 5.81654400  | 0.01537300  |
| H  | 1.45064900  | 4.49836800  | 2.17193100  |
| H  | -0.07024400 | 4.24639600  | 1.30633500  |
| H  | 2.35825400  | 2.35741000  | 1.25791800  |
| H  | 0.81753400  | 2.06439700  | 2.08621200  |
| H  | -0.05151700 | 4.25574700  | -1.30718600 |
| N  | 0.75404200  | 1.94511000  | -0.00311600 |
| H  | -0.25496700 | 2.12067000  | -0.01005200 |
| C  | -1.63637100 | -0.20453100 | 1.21575400  |
| C  | -0.93221900 | -0.14277100 | 0.00962400  |
| C  | -1.65827500 | -0.13795300 | -1.18865400 |
| C  | -3.04763600 | -0.18462700 | -1.18094900 |
| C  | -3.73312800 | -0.23870100 | 0.03371900  |
| C  | -3.02898700 | -0.24923100 | 1.23426400  |
| H  | -1.09923800 | -0.21606600 | 2.16669200  |
| H  | -1.13750900 | -0.09230600 | -2.14764200 |
| H  | -3.60600300 | -0.17685100 | -2.11786300 |
| H  | -3.56402700 | -0.29195100 | 2.18129400  |
| Br | 3.35023800  | 0.05095500  | -0.00520100 |
| C  | -5.22238100 | -0.27312200 | 0.00211500  |
| F  | -5.73659000 | 0.82211900  | -0.58779100 |
| F  | -5.76873700 | -0.35038000 | 1.22148700  |
| F  | -5.68697400 | -1.32083000 | -0.70279300 |

### TS3b

Gibbs free energy before correction = -3811.84336600

Gibbs free energy after correction = -3811.82957597

|    |            |             |             |
|----|------------|-------------|-------------|
| Ni | 1.07751600 | -0.04455100 | 0.00224000  |
| C  | 0.67353800 | -2.60409100 | -1.21251200 |

|    |             |             |             |
|----|-------------|-------------|-------------|
| C  | 1.93734800  | -3.46136700 | -1.25831000 |
| C  | 2.04399300  | -4.32963600 | -0.01309700 |
| C  | 1.96666200  | -3.46103700 | 1.23403400  |
| C  | 0.70108900  | -2.60530500 | 1.21812200  |
| H  | 1.91915900  | -4.06917300 | -2.17348100 |
| H  | -0.22502000 | -3.24903400 | -1.23160100 |
| H  | 0.63642800  | -1.93523500 | -2.08021800 |
| H  | 1.21832000  | -5.06106000 | -0.00330000 |
| H  | 2.97926400  | -4.90607000 | -0.02408000 |
| H  | 1.97124000  | -4.06849100 | 2.14962500  |
| H  | 2.83473800  | -2.78460500 | 1.27240400  |
| H  | -0.19618300 | -3.25112200 | 1.25669100  |
| H  | 0.68272400  | -1.93713900 | 2.08704600  |
| H  | 2.80534200  | -2.78647700 | -1.31823400 |
| N  | 0.68431500  | -1.80885300 | 0.00321000  |
| C  | 1.27795800  | 2.56038100  | -1.22730800 |
| C  | 0.96275300  | 4.04678000  | -1.25299100 |
| C  | 1.50571700  | 4.73362700  | -0.00560900 |
| C  | 0.97171800  | 4.05095600  | 1.24792800  |
| C  | 1.28674700  | 2.56445300  | 1.22512800  |
| H  | 1.38363700  | 4.49184700  | -2.16533100 |
| H  | 2.36198900  | 2.38154600  | -1.25386700 |
| H  | 0.83462200  | 2.03560400  | -2.08528500 |
| H  | 2.60710000  | 4.67326400  | -0.00946200 |
| H  | 1.24616700  | 5.80113400  | -0.00645800 |
| H  | 1.39895600  | 4.49918600  | 2.15575500  |
| H  | -0.12092500 | 4.18954100  | 1.30694500  |
| H  | 2.37093500  | 2.38560900  | 1.24458200  |
| H  | 0.84946100  | 2.04254500  | 2.08796400  |
| H  | -0.13027700 | 4.18523200  | -1.30478800 |
| N  | 0.77549200  | 1.90531600  | 0.00185000  |
| H  | -0.24333800 | 2.01859100  | 0.00537100  |
| C  | -1.49867200 | -0.44280500 | 1.23142900  |
| C  | -0.79413100 | -0.49375300 | 0.01756500  |
| C  | -1.51469400 | -0.42720700 | -1.18933700 |
| C  | -2.89179800 | -0.27671500 | -1.17637400 |
| C  | -3.57844700 | -0.21530700 | 0.03958000  |
| C  | -2.87983600 | -0.29362700 | 1.24257200  |
| H  | -0.96710200 | -0.49945200 | 2.18145600  |
| H  | -0.99505200 | -0.47090800 | -2.14660000 |
| H  | -3.44328000 | -0.20391700 | -2.11408100 |
| H  | -3.41240300 | -0.23615000 | 2.18973500  |
| Br | 3.44979700  | 0.03872400  | -0.00536300 |
| C  | -5.05864800 | -0.05028300 | 0.00284800  |

|   |             |             |             |
|---|-------------|-------------|-------------|
| F | -5.41803600 | 1.10958200  | -0.57674500 |
| F | -5.61596100 | -0.06765000 | 1.21880200  |
| F | -5.65114400 | -1.01957800 | -0.71685900 |

### 8b

Gibbs free energy before correction = -3811.90380800

Gibbs free energy after correction = -3811.89001797

|    |             |             |             |
|----|-------------|-------------|-------------|
| Ni | 0.77207100  | 0.34840600  | -0.12634100 |
| C  | 2.78531500  | -2.07871300 | -0.95813100 |
| C  | 4.12785100  | -1.37420100 | -1.00612500 |
| C  | 4.84332700  | -1.49018600 | 0.32986000  |
| C  | 3.94516700  | -0.92882200 | 1.41957400  |
| C  | 2.58777800  | -1.61085900 | 1.43822700  |
| H  | 4.72175300  | -1.81039800 | -1.82091200 |
| H  | 2.92594200  | -3.16200600 | -0.78370000 |
| H  | 2.27436800  | -1.96207900 | -1.91667400 |
| H  | 5.06852600  | -2.55010400 | 0.53808700  |
| H  | 5.80354400  | -0.95694500 | 0.30734800  |
| H  | 4.40005500  | -1.04070900 | 2.41338900  |
| H  | 3.78477500  | 0.14588900  | 1.23891000  |
| H  | 2.68294400  | -2.66971300 | 1.74527700  |
| H  | 1.94977100  | -1.10279900 | 2.16979100  |
| H  | 3.95551100  | -0.31149400 | -1.23984600 |
| N  | 1.93861600  | -1.53811600 | 0.12053300  |
| C  | -1.38510400 | 2.13087300  | -1.05690900 |
| C  | -2.74556900 | 2.78692000  | -0.88519700 |
| C  | -2.78554100 | 3.61217100  | 0.39610200  |
| C  | -2.38990300 | 2.75558900  | 1.59346400  |
| C  | -1.03907300 | 2.09827900  | 1.36018300  |
| H  | -2.97037900 | 3.40869500  | -1.76320300 |
| H  | -0.59309300 | 2.88488400  | -1.18023900 |
| H  | -1.35867700 | 1.48083500  | -1.94304400 |
| H  | -2.07795600 | 4.45351700  | 0.30502900  |
| H  | -3.78196900 | 4.05072600  | 0.54482700  |
| H  | -2.35645900 | 3.35411300  | 2.51472400  |
| H  | -3.14739000 | 1.96867400  | 1.75114500  |
| H  | -0.24081800 | 2.85146200  | 1.27732800  |
| H  | -0.76939600 | 1.42363900  | 2.18561000  |
| H  | -3.51784000 | 1.99989800  | -0.84376100 |
| N  | -1.00884000 | 1.31128700  | 0.11148700  |
| H  | -1.71774400 | 0.57579600  | 0.20340700  |
| C  | -0.24480600 | -1.95597600 | 1.21335000  |
| C  | 0.54238900  | -1.74380600 | 0.05359700  |
| C  | -0.12921400 | -1.65224900 | -1.19587100 |

|    |             |             |             |
|----|-------------|-------------|-------------|
| C  | -1.51728500 | -1.70671400 | -1.25801700 |
| C  | -2.27140900 | -1.86278400 | -0.10015900 |
| C  | -1.62479000 | -1.99814900 | 1.13185500  |
| H  | 0.22483000  | -2.09449500 | 2.18213900  |
| H  | 0.42465900  | -1.55677800 | -2.12536000 |
| H  | -2.00607500 | -1.61074400 | -2.22539600 |
| H  | -2.20698000 | -2.14244800 | 2.04051600  |
| Br | 2.33695900  | 2.09372300  | -0.39163700 |
| C  | -3.75589100 | -1.76596900 | -0.14113600 |
| F  | -4.17726700 | -0.51800200 | 0.16337800  |
| F  | -4.34620200 | -2.58223600 | 0.74310600  |
| F  | -4.26001700 | -2.05173100 | -1.34678100 |

### 8b

Gibbs free energy before correction = -3811.90530400

Gibbs free energy after correction = -3811.89151397

|    |             |             |             |
|----|-------------|-------------|-------------|
| Ni | 1.05423200  | -0.46878800 | -0.00650900 |
| C  | 0.62969500  | 2.18728200  | -1.21305400 |
| C  | 0.00655800  | 3.57344300  | -1.27049000 |
| C  | 0.36244000  | 4.37126300  | -0.01993400 |
| C  | 0.01972900  | 3.58684100  | 1.24266400  |
| C  | 0.64530500  | 2.20160700  | 1.19422200  |
| H  | 0.35872700  | 4.08707800  | -2.17546000 |
| H  | 1.72314500  | 2.27487500  | -1.15055800 |
| H  | 0.42272000  | 1.59257800  | -2.10795200 |
| H  | 1.44455000  | 4.58448900  | -0.02642800 |
| H  | -0.15142500 | 5.34194100  | -0.02262400 |
| H  | 0.37935600  | 4.11112500  | 2.13853900  |
| H  | -1.07313000 | 3.49473100  | 1.34618700  |
| H  | 1.73755500  | 2.29160900  | 1.11617400  |
| H  | 0.45154000  | 1.61831300  | 2.09938600  |
| H  | -1.08745800 | 3.48346800  | -1.36227000 |
| N  | 0.20707800  | 1.43666000  | -0.00231200 |
| C  | 3.68570400  | -0.51641500 | -1.21238200 |
| C  | 5.18574800  | -0.26917100 | -1.23454100 |
| C  | 5.84160400  | -0.82760300 | 0.02265500  |
| C  | 5.17156700  | -0.25597700 | 1.26636400  |
| C  | 3.67177800  | -0.50318100 | 1.22964100  |
| H  | 5.61827800  | -0.71827400 | -2.13967100 |
| H  | 3.47018400  | -1.59591700 | -1.23338400 |
| H  | 3.18891900  | -0.06720000 | -2.08366900 |
| H  | 5.73737100  | -1.92580400 | 0.02782600  |
| H  | 6.91886400  | -0.61148800 | 0.02760800  |
| H  | 5.59358700  | -0.69573500 | 2.18099200  |

|    |             |             |             |
|----|-------------|-------------|-------------|
| H  | 5.35643600  | 0.83019100  | 1.31937100  |
| H  | 3.45615300  | -1.58247600 | 1.26002500  |
| H  | 3.16564900  | -0.04471600 | 2.09061700  |
| H  | 5.37110100  | 0.81641700  | -1.29671600 |
| N  | 3.03660300  | 0.02139000  | 0.00208600  |
| H  | 3.18087700  | 1.03497700  | -0.00291400 |
| C  | -1.83569500 | 0.71000200  | -1.18789100 |
| C  | -1.15127800 | 0.97630800  | 0.01029900  |
| C  | -1.80101300 | 0.68341500  | 1.21909100  |
| C  | -3.07234000 | 0.12970100  | 1.23014500  |
| C  | -3.73142600 | -0.14284100 | 0.03675300  |
| C  | -3.10518000 | 0.15791600  | -1.17097500 |
| H  | -1.38011200 | 0.91838100  | -2.15117000 |
| H  | -1.31592400 | 0.86763500  | 2.17289300  |
| H  | -3.54729000 | -0.09087900 | 2.18356300  |
| H  | -3.61372600 | -0.04165400 | -2.11352300 |
| Br | 0.59316500  | -2.72933500 | -0.02169900 |
| C  | -5.11402300 | -0.69542600 | 0.01522200  |
| F  | -5.23323700 | -1.71719800 | -0.84920500 |
| F  | -6.01724500 | 0.22374000  | -0.37439900 |
| F  | -5.51018600 | -1.14323300 | 1.21246200  |

## 2c

Gibbs free energy before correction = -3589.10127200

Gibbs free energy after correction = -3589.08748160

|    |             |             |             |
|----|-------------|-------------|-------------|
| Ni | -0.81283600 | -0.39311300 | 0.00917400  |
| Br | -0.43666200 | -2.68053400 | 0.01682800  |
| C  | -0.23371300 | 2.21674800  | 1.22838100  |
| C  | 0.57299900  | 3.50625000  | 1.26041800  |
| C  | 0.31289900  | 4.33386400  | 0.00716400  |
| C  | 0.57641500  | 3.50411400  | -1.24392500 |
| C  | -0.22802300 | 2.21328200  | -1.21132300 |
| H  | 0.33285400  | 4.07638600  | 2.16900400  |
| H  | -1.31305400 | 2.43936700  | 1.25954700  |
| H  | -0.00614100 | 1.58115200  | 2.09609100  |
| H  | -0.73990100 | 4.66397300  | 0.00553900  |
| H  | 0.92856500  | 5.24391100  | 0.00706300  |
| H  | 0.33666800  | 4.07191800  | -2.15409900 |
| H  | 1.64918900  | 3.24836900  | -1.29912800 |
| H  | -1.30744300 | 2.43455900  | -1.24855800 |
| H  | 0.00426000  | 1.57595600  | -2.07658700 |
| H  | 1.64536100  | 3.24819900  | 1.31760700  |
| N  | 0.03509500  | 1.42897400  | 0.01032700  |
| H  | 1.05071500  | 1.22657900  | 0.01435500  |



|   |             |             |             |
|---|-------------|-------------|-------------|
| C | -3.47697500 | -0.27694300 | 1.21163800  |
| C | -4.95217800 | 0.09265700  | 1.23229900  |
| C | -5.65137000 | -0.41893900 | -0.02172200 |
| C | -4.93604300 | 0.08519900  | -1.26967200 |
| C | -3.46107600 | -0.28356300 | -1.22764000 |
| H | -5.42151100 | -0.31225300 | 2.14001900  |
| H | -3.35293800 | -1.37086600 | 1.24249100  |
| H | -2.94526300 | 0.13610500  | 2.08034500  |
| H | -5.63794400 | -1.52209400 | -0.01832500 |
| H | -6.70743000 | -0.11562800 | -0.02937100 |
| H | -5.39334400 | -0.32560500 | -2.18089700 |
| H | -5.03043500 | 1.18250500  | -1.33148700 |
| H | -3.33611500 | -1.37759900 | -1.25108100 |
| H | -2.91841700 | 0.12502000  | -2.09170200 |
| H | -5.04674500 | 1.19038200  | 1.28604900  |
| N | -2.78729400 | 0.19424000  | -0.00486200 |
| H | -2.83248500 | 1.21684400  | -0.00763100 |
| C | 5.25803900  | -0.03500200 | -0.11917100 |
| C | 4.16926600  | 1.05708400  | 0.01586200  |
| H | 6.01524200  | 0.05531300  | 0.67246000  |
| H | 5.77805400  | 0.03760200  | -1.08504700 |
| H | 4.27398200  | 1.61773200  | 0.95593400  |
| H | 4.21600900  | 1.78064200  | -0.81059500 |
| C | 3.88498100  | -1.45619000 | 1.21267200  |
| H | 3.51048400  | -2.48486200 | 1.31956200  |
| H | 4.57429500  | -1.26500200 | 2.04755700  |
| C | 2.72160600  | -0.43772200 | 1.19366100  |
| H | 1.74779000  | -0.94851100 | 1.13120600  |
| H | 2.71847700  | 0.19848900  | 2.09144400  |
| C | 2.70447000  | -0.39133100 | -1.19752200 |
| H | 1.67422000  | -0.78048000 | -1.23378800 |
| H | 2.85216500  | 0.26704000  | -2.06664900 |
| C | 3.73443000  | -1.54305400 | -1.16417500 |
| H | 3.23273600  | -2.51441300 | -1.04292000 |
| H | 4.32366800  | -1.58466200 | -2.09124100 |
| N | 2.84130400  | 0.43225600  | 0.01330100  |
| N | 4.65269900  | -1.36817600 | -0.03372100 |

### 3c

Gibbs free energy before correction = -3589.04906400

Gibbs free energy after correction = -3589.03527360

|    |             |             |             |
|----|-------------|-------------|-------------|
| Ni | -0.73786800 | 0.15265800  | -0.68378900 |
| Br | 0.37396000  | -1.38470200 | -2.19652900 |
| C  | -0.67638300 | 2.57688900  | 0.96528700  |

|   |             |             |             |
|---|-------------|-------------|-------------|
| C | -0.40663700 | 4.06690100  | 0.74684500  |
| C | -1.67237100 | 4.75904100  | 0.25309700  |
| C | -2.24918000 | 4.02576900  | -0.95267400 |
| C | -2.40615800 | 2.53580700  | -0.63994100 |
| H | -0.04196200 | 4.53792000  | 1.67391500  |
| H | -1.41061700 | 2.49970500  | 1.81045300  |
| H | 0.24360300  | 2.08095400  | 1.31839400  |
| H | -2.42030900 | 4.74623100  | 1.06618300  |
| H | -1.48367600 | 5.81819100  | 0.02164600  |
| H | -3.21450500 | 4.46548900  | -1.25089600 |
| H | -1.56459800 | 4.13309000  | -1.81138000 |
| H | -3.19699900 | 2.44877400  | 0.15174600  |
| H | -2.80354100 | 2.01093300  | -1.52404500 |
| H | 0.39365800  | 4.17046700  | -0.00692000 |
| N | -1.17069000 | 1.91746800  | -0.21965500 |
| H | 4.38579200  | -1.76288300 | -0.51311700 |
| C | -2.74853700 | -1.96907700 | -0.36057900 |
| C | -3.44784600 | -3.12049600 | 0.34626000  |
| C | -3.87055500 | -2.71445100 | 1.75312000  |
| C | -2.67458500 | -2.17569300 | 2.52929600  |
| C | -2.00028300 | -1.04978300 | 1.75951600  |
| H | -4.31335800 | -3.44915300 | -0.24690900 |
| H | -3.45057400 | -1.12922900 | -0.50458400 |
| H | -2.37716300 | -2.26148700 | -1.35121300 |
| H | -4.64101300 | -1.92747700 | 1.68610700  |
| H | -4.32972400 | -3.56110100 | 2.28243100  |
| H | -2.97746400 | -1.81680000 | 3.52338400  |
| H | -1.94356100 | -2.98596600 | 2.69104300  |
| H | -2.68986000 | -0.19445200 | 1.65588600  |
| H | -1.10814400 | -0.68154900 | 2.28546200  |
| H | -2.75547000 | -3.97763200 | 0.40245100  |
| N | -1.60272700 | -1.43703500 | 0.39694200  |
| H | -0.89331500 | -2.17331400 | 0.45774400  |
| C | 3.98398200  | 0.49793500  | 1.91660200  |
| C | 4.79097200  | -0.53123900 | 1.10017700  |
| H | 4.49917000  | 1.46585800  | 1.92240600  |
| H | 3.87844000  | 0.16397600  | 2.95578700  |
| H | 5.65770400  | -0.09650200 | 0.59250800  |
| H | 5.11701100  | -1.39324800 | 1.69013400  |
| C | 2.76037200  | 1.11918500  | -0.03989800 |
| H | 1.74636800  | 1.28816000  | -0.43398900 |
| H | 3.30377400  | 2.07180200  | -0.06014100 |
| C | 3.47746100  | 0.06002000  | -0.89701800 |
| H | 2.81025800  | -0.38274600 | -1.64743600 |

|   |            |             |             |
|---|------------|-------------|-------------|
| H | 4.39305400 | 0.42512900  | -1.37217600 |
| C | 2.66543400 | -1.69179900 | 0.63883200  |
| H | 2.06876300 | -2.09040100 | -0.19230200 |
| H | 3.02457200 | -2.50769500 | 1.27424800  |
| C | 1.91866300 | -0.58801300 | 1.40797200  |
| H | 0.92447400 | -0.42779600 | 0.95567400  |
| H | 1.78337900 | -0.87082000 | 2.45925000  |
| N | 3.88138700 | -1.05314700 | 0.02816700  |
| N | 2.64794900 | 0.67953500  | 1.35190100  |

#### 4c

Gibbs free energy before correction = -923.51300300

Gibbs free energy after correction = -923.49921256

|    |             |             |             |
|----|-------------|-------------|-------------|
| Ni | -0.11905700 | -0.65741000 | -0.03077400 |
| C  | -2.48625300 | -2.08904400 | 0.96886300  |
| C  | -3.74040800 | -1.27584500 | 1.29337900  |
| C  | -4.62919000 | -1.16800500 | 0.05916600  |
| C  | -3.82934900 | -0.66702500 | -1.13832300 |
| C  | -2.57382400 | -1.52090200 | -1.32785400 |
| H  | -4.29264600 | -1.73100500 | 2.13114100  |
| H  | -2.82183300 | -3.13512100 | 0.76003200  |
| H  | -1.83675900 | -2.14523500 | 1.85675400  |
| H  | -5.02864700 | -2.17038500 | -0.17715700 |
| H  | -5.50050200 | -0.52428900 | 0.25215200  |
| H  | -4.44765600 | -0.67460400 | -2.05019800 |
| H  | -3.51995600 | 0.37904000  | -0.96418300 |
| H  | -2.91564400 | -2.54755900 | -1.61031500 |
| H  | -1.99096300 | -1.14301600 | -2.18368500 |
| H  | -3.43188200 | -0.26684500 | 1.61867000  |
| N  | -1.73735300 | -1.55917000 | -0.14873400 |
| C  | 2.61254700  | -0.85710200 | 1.21874500  |
| C  | 4.04192500  | -1.37751100 | 1.24021200  |
| C  | 4.81516100  | -0.87858400 | 0.02510900  |
| C  | 4.07582400  | -1.23936500 | -1.25792900 |
| C  | 2.64642700  | -0.72073000 | -1.21704700 |
| H  | 4.53292600  | -1.07106600 | 2.17463200  |
| H  | 2.61330300  | 0.24023800  | 1.31659700  |
| H  | 2.02495800  | -1.25753100 | 2.05576500  |
| H  | 4.91831300  | 0.21819500  | 0.08684700  |
| H  | 5.83356500  | -1.29116300 | 0.01618900  |
| H  | 4.59144500  | -0.83333300 | -2.13960900 |
| H  | 4.05517000  | -2.33578300 | -1.37642800 |
| H  | 2.64911900  | 0.38071600  | -1.19048400 |
| H  | 2.08152100  | -1.02321100 | -2.10912000 |

|   |             |             |             |
|---|-------------|-------------|-------------|
| H | 4.02104700  | -2.48030200 | 1.23680300  |
| N | 1.90271600  | -1.19070500 | -0.03180900 |
| H | 1.86745600  | -2.21127600 | -0.08985800 |
| C | -0.31814400 | 1.99257700  | 1.26169200  |
| C | -0.11131000 | 3.49759400  | 1.33893600  |
| C | -0.61178900 | 4.17423400  | 0.06812100  |
| C | 0.03975500  | 3.54663500  | -1.15850600 |
| C | -0.17083600 | 2.04007000  | -1.16660500 |
| H | -0.62257800 | 3.89597300  | 2.22672400  |
| H | -1.39457800 | 1.75821800  | 1.21092500  |
| H | 0.08460000  | 1.48282200  | 2.14805100  |
| H | -1.70574400 | 4.05011100  | -0.00041800 |
| H | -0.41771500 | 5.25532600  | 0.10067400  |
| H | -0.36101000 | 3.98123500  | -2.08520500 |
| H | 1.12281700  | 3.75659100  | -1.14957900 |
| H | -1.24444700 | 1.80553500  | -1.25734600 |
| H | 0.33804700  | 1.56605100  | -2.01748400 |
| H | 0.96409600  | 3.70562300  | 1.46982700  |
| N | 0.30505300  | 1.38833000  | 0.06903600  |
| H | 1.31164800  | 1.56237400  | 0.13374900  |

### 5c

Gibbs free energy before correction = -3811.82241200

Gibbs free energy after correction = -3811.80862197

|    |             |             |             |
|----|-------------|-------------|-------------|
| Ni | 0.42114200  | 0.01385300  | 0.51078500  |
| C  | 2.10030700  | 1.92180700  | 1.90308400  |
| C  | 3.29366500  | 2.74109400  | 1.41070600  |
| C  | 2.81565200  | 4.03153800  | 0.75599800  |
| C  | 1.77912300  | 3.73160000  | -0.32010300 |
| C  | 0.65027100  | 2.88162400  | 0.26132600  |
| H  | 3.97629100  | 2.95346300  | 2.24704100  |
| H  | 1.61601800  | 2.48840200  | 2.73050000  |
| H  | 2.44309900  | 0.96555500  | 2.32959100  |
| H  | 2.35562200  | 4.67514800  | 1.52598200  |
| H  | 3.66202400  | 4.59655100  | 0.33941700  |
| H  | 1.37536000  | 4.66050700  | -0.74968400 |
| H  | 2.25419700  | 3.17127000  | -1.14403400 |
| H  | 0.11891100  | 3.49230700  | 1.02675500  |
| H  | -0.08973600 | 2.63829400  | -0.51850500 |
| H  | 3.85898200  | 2.14236700  | 0.67681000  |
| N  | 1.14548500  | 1.65670200  | 0.84852700  |
| C  | 2.86727300  | -1.00944400 | -0.72807200 |
| C  | 3.62266300  | -1.76144900 | -1.81136600 |
| C  | 3.25881300  | -1.22221000 | -3.18989300 |

|    |             |             |             |
|----|-------------|-------------|-------------|
| C  | 1.74830900  | -1.25198800 | -3.39227300 |
| C  | 1.03811400  | -0.52083800 | -2.26424300 |
| H  | 4.70324100  | -1.68254600 | -1.62782600 |
| H  | 3.15342600  | 0.05413400  | -0.72856600 |
| H  | 3.08301100  | -1.40609800 | 0.27384900  |
| H  | 3.61433400  | -0.18175800 | -3.27581400 |
| H  | 3.76625700  | -1.79606300 | -3.97735800 |
| H  | 1.46858300  | -0.80229600 | -4.35511000 |
| H  | 1.39766900  | -2.29754700 | -3.41320500 |
| H  | 1.30873500  | 0.54761800  | -2.26476600 |
| H  | -0.05412700 | -0.58573000 | -2.36376400 |
| H  | 3.36518700  | -2.83220900 | -1.75088000 |
| N  | 1.40359300  | -1.05292100 | -0.93423000 |
| H  | 1.12105500  | -2.03740700 | -0.91203800 |
| C  | -1.28823100 | -0.21235200 | 1.55009200  |
| C  | -0.92672000 | -1.42582000 | 0.87878700  |
| C  | -1.65504400 | -1.86759300 | -0.26398800 |
| C  | -2.61822000 | -1.06235100 | -0.80512200 |
| C  | -2.94505200 | 0.17672600  | -0.18401600 |
| C  | -2.32605800 | 0.57453100  | 0.97197100  |
| H  | -1.00638200 | -0.03741000 | 2.58794700  |
| H  | -1.41843600 | -2.82897300 | -0.71886500 |
| H  | -3.14994900 | -1.37129500 | -1.70428500 |
| H  | -2.62999600 | 1.48998300  | 1.47656100  |
| Br | 0.09652500  | -2.72958900 | 1.86817000  |
| C  | -4.00248600 | 1.00630200  | -0.82263700 |
| F  | -3.66511800 | 1.35097100  | -2.08016500 |
| F  | -4.25355600 | 2.14137900  | -0.16190200 |
| F  | -5.16816200 | 0.34297800  | -0.92451900 |

### TS1c

Gibbs free energy before correction = -3811.78419600

Gibbs free energy after correction = -3811.77040597

|    |             |             |             |
|----|-------------|-------------|-------------|
| Ni | -0.83292900 | -0.16464000 | 0.02677400  |
| C  | 0.22928100  | 2.20458000  | 1.23699600  |
| C  | 1.53724300  | 2.99395800  | 1.29790900  |
| C  | 1.67699500  | 3.86630300  | 0.05609600  |
| C  | 1.52292900  | 3.02418800  | -1.20482800 |
| C  | 0.21630600  | 2.23222200  | -1.14799400 |
| H  | 1.57944000  | 3.60199400  | 2.21422800  |
| H  | -0.61506000 | 2.93883400  | 1.32011700  |
| H  | 0.15264400  | 1.53816900  | 2.11328300  |
| H  | 0.88718000  | 4.63858200  | 0.07028700  |
| H  | 2.63747500  | 4.40110600  | 0.05700300  |

|    |             |             |             |
|----|-------------|-------------|-------------|
| H  | 1.55305500  | 3.65485400  | -2.10624200 |
| H  | 2.35818300  | 2.30803900  | -1.27363600 |
| H  | -0.62996000 | 2.96700800  | -1.20530800 |
| H  | 0.13162100  | 1.58582500  | -2.03854600 |
| H  | 2.37234000  | 2.27515000  | 1.33863000  |
| N  | 0.13806800  | 1.41803400  | 0.03561300  |
| C  | -3.54685800 | 0.24199200  | 1.19505400  |
| C  | -4.91418700 | 0.90877200  | 1.20270200  |
| C  | -5.65927000 | 0.61862400  | -0.09564900 |
| C  | -4.81609300 | 1.03554200  | -1.29574600 |
| C  | -3.45118200 | 0.36530600  | -1.24891500 |
| H  | -5.48901400 | 0.56583900  | 2.07399200  |
| H  | -3.65275900 | -0.85425500 | 1.17536300  |
| H  | -2.96115800 | 0.49250300  | 2.09042700  |
| H  | -5.86867900 | -0.46256600 | -0.15875200 |
| H  | -6.63193000 | 1.12794900  | -0.10791000 |
| H  | -5.31993800 | 0.78543000  | -2.23954700 |
| H  | -4.68213000 | 2.13041000  | -1.29011300 |
| H  | -3.55553700 | -0.72685900 | -1.34821200 |
| H  | -2.79889000 | 0.70357600  | -2.06582500 |
| H  | -4.78554600 | 1.99816300  | 1.31853100  |
| N  | -2.73944100 | 0.60990300  | 0.01852400  |
| H  | -2.50744000 | 1.60498800  | 0.07614800  |
| C  | 1.10428500  | -1.56504500 | -1.22610000 |
| C  | 0.43679100  | -1.65746900 | 0.00737000  |
| C  | 1.12895400  | -1.57644800 | 1.22695200  |
| C  | 2.44201700  | -1.14206000 | 1.20114000  |
| C  | 3.07182700  | -0.87440000 | -0.01539300 |
| C  | 2.41664600  | -1.13131100 | -1.22222300 |
| H  | 0.56362100  | -1.72435000 | -2.15645500 |
| H  | 0.60730000  | -1.74287400 | 2.16686500  |
| H  | 2.97729900  | -0.97580500 | 2.13371600  |
| H  | 2.93389200  | -0.95694800 | -2.16410900 |
| Br | -1.39558500 | -2.57535300 | 0.02098400  |
| C  | 4.48358500  | -0.39067100 | -0.04015200 |
| F  | 4.69919100  | 0.45256100  | -1.06009800 |
| F  | 5.36007400  | -1.39727800 | -0.18607600 |
| F  | 4.81245500  | 0.25054600  | 1.08836000  |

### 2b-1

Gibbs free energy before correction = -6384.06335800

Gibbs free energy after correction = -6384.04956765

|    |            |             |             |
|----|------------|-------------|-------------|
| Ni | 1.43330100 | 0.70085500  | -0.30800700 |
| Br | 1.22092200 | 0.12363100  | -2.65947500 |
| C  | 4.02205600 | -0.78121600 | -0.37127000 |

|    |             |             |             |
|----|-------------|-------------|-------------|
| C  | 5.52499800  | -0.80113900 | -0.15045500 |
| C  | 5.85618400  | -0.45791400 | 1.29751700  |
| C  | 5.22763100  | 0.87535000  | 1.68659000  |
| C  | 3.73248400  | 0.86781800  | 1.40946500  |
| H  | 5.92562900  | -1.78738700 | -0.42396500 |
| H  | 3.54375600  | -1.55852700 | 0.24604200  |
| H  | 3.73746400  | -0.97427900 | -1.41320200 |
| H  | 5.45967600  | -1.25060100 | 1.95464200  |
| H  | 6.94343900  | -0.43215600 | 1.45359000  |
| H  | 5.40543400  | 1.10309000  | 2.74693400  |
| H  | 5.69296300  | 1.68679100  | 1.10236800  |
| H  | 3.22629700  | 0.13047100  | 2.05476400  |
| H  | 3.27690100  | 1.84669000  | 1.61559800  |
| H  | 5.99738600  | -0.06591600 | -0.82359000 |
| N  | 3.41439900  | 0.50741100  | 0.01145700  |
| H  | 3.82042700  | 1.22525600  | -0.59586000 |
| C  | -0.94686100 | 2.38200300  | -0.76082800 |
| C  | -2.30550200 | 2.90477300  | -0.32467800 |
| C  | -2.22903600 | 3.52893400  | 1.06431800  |
| C  | -1.63052400 | 2.54236800  | 2.06043600  |
| C  | -0.28478100 | 2.03540900  | 1.56671900  |
| H  | -2.67826100 | 3.62888700  | -1.06285100 |
| H  | -0.22615200 | 3.20847100  | -0.86839100 |
| H  | -0.98526100 | 1.86018100  | -1.72566500 |
| H  | -1.59402600 | 4.42997000  | 1.02191200  |
| H  | -3.22317100 | 3.85817300  | 1.39699100  |
| H  | -1.51497500 | 2.99993800  | 3.05283100  |
| H  | -2.31224100 | 1.68180200  | 2.18098000  |
| H  | 0.43846200  | 2.86490400  | 1.50335600  |
| H  | 0.14304000  | 1.28318400  | 2.24790000  |
| H  | -3.02450100 | 2.06636000  | -0.31111800 |
| N  | -0.37193300 | 1.43676800  | 0.21775600  |
| H  | -1.02134600 | 0.64818900  | 0.27661000  |
| C  | -1.44488600 | -1.54438000 | -0.75692300 |
| C  | -1.01050200 | -1.74571700 | 0.54757100  |
| C  | -1.86422900 | -1.62829200 | 1.64012100  |
| C  | -3.18837100 | -1.27898400 | 1.41436800  |
| C  | -3.63591700 | -1.05227400 | 0.11306900  |
| C  | -2.77262500 | -1.18658400 | -0.96951500 |
| H  | -0.73704100 | -1.57087700 | -1.58525000 |
| H  | -1.50059500 | -1.78783800 | 2.65287600  |
| H  | -3.87163000 | -1.16777300 | 2.25540300  |
| H  | -3.12303200 | -0.99802000 | -1.98185300 |
| Br | 0.83230800  | -2.07988400 | 0.85326300  |

|   |             |             |             |
|---|-------------|-------------|-------------|
| C | -5.04893100 | -0.60258400 | -0.07023800 |
| F | -5.39488300 | -0.48607400 | -1.35469800 |
| F | -5.25356300 | 0.59592800  | 0.50537100  |
| F | -5.91805600 | -1.44749200 | 0.50360300  |

## 2b-2

Gibbs free energy before correction = -6384.05729000

Gibbs free energy after correction = -6384.04349965

|    |             |             |             |
|----|-------------|-------------|-------------|
| Ni | -1.25896400 | 0.18075600  | -0.55794600 |
| Br | -1.64192100 | 2.14626400  | -1.75958900 |
| C  | -0.55400700 | -2.67901400 | -0.35499100 |
| C  | 0.45925100  | -3.76304900 | -0.02434100 |
| C  | 0.78794000  | -3.75544900 | 1.46365700  |
| C  | 1.26351900  | -2.37063800 | 1.88675900  |
| C  | 0.24285400  | -1.30789300 | 1.50883200  |
| H  | 0.07132700  | -4.74040500 | -0.34298300 |
| H  | -1.50568400 | -2.87328700 | 0.16309400  |
| H  | -0.76731300 | -2.63836600 | -1.43110200 |
| H  | -0.11591200 | -4.02294500 | 2.03658900  |
| H  | 1.54857200  | -4.51305800 | 1.69710200  |
| H  | 1.45618900  | -2.32696600 | 2.96774700  |
| H  | 2.22130800  | -2.14906300 | 1.38420000  |
| H  | -0.69415800 | -1.46759100 | 2.06219600  |
| H  | 0.59866600  | -0.29597100 | 1.75070800  |
| H  | 1.38084300  | -3.58037000 | -0.60481000 |
| N  | -0.09389000 | -1.33667300 | 0.06573700  |
| H  | 0.78245400  | -1.16042000 | -0.43688000 |
| C  | -3.36510500 | -0.75093900 | 1.46074900  |
| C  | -4.83055300 | -0.86556500 | 1.85204000  |
| C  | -5.59444100 | -1.70610300 | 0.83574000  |
| C  | -5.40048000 | -1.14509000 | -0.56806300 |
| C  | -3.92089900 | -1.02220800 | -0.89816200 |
| H  | -4.91098200 | -1.29441900 | 2.86090300  |
| H  | -2.88833700 | -1.74374200 | 1.49374700  |
| H  | -2.81334600 | -0.09867200 | 2.15145100  |
| H  | -5.21769000 | -2.74264000 | 0.86663100  |
| H  | -6.66193800 | -1.75024700 | 1.09232300  |
| H  | -5.89482100 | -1.77734100 | -1.31909500 |
| H  | -5.86542100 | -0.14695600 | -0.63426200 |
| H  | -3.45440500 | -2.01990200 | -0.92481600 |
| H  | -3.76285800 | -0.55868500 | -1.88125200 |
| H  | -5.26837900 | 0.14568200  | 1.89861000  |
| N  | -3.18061300 | -0.22292000 | 0.09759000  |
| H  | -3.57293400 | 0.72321500  | 0.07803600  |



|    |            |             |             |
|----|------------|-------------|-------------|
| C  | 2.38851400 | 0.51125300  | -1.14668500 |
| C  | 3.30858200 | -0.19089300 | -0.37680700 |
| C  | 3.67003500 | 0.22609100  | 0.89942200  |
| C  | 3.05744800 | 1.35276200  | 1.43391100  |
| C  | 2.10630600 | 2.04397800  | 0.68753800  |
| C  | 1.77837300 | 1.63604500  | -0.60302300 |
| H  | 2.12202500 | 0.17302700  | -2.14736100 |
| H  | 4.40227100 | -0.33185900 | 1.47884000  |
| H  | 3.31564700 | 1.67966100  | 2.43882500  |
| H  | 1.00582200 | 2.15822300  | -1.16864300 |
| Br | 4.02466500 | -1.81233600 | -1.05204000 |
| C  | 1.33630700 | 3.16307900  | 1.31024600  |
| F  | 0.99341800 | 4.10097900  | 0.42197900  |
| F  | 2.02050600 | 3.76973300  | 2.28857200  |
| F  | 0.19315300 | 2.71410900  | 1.86228000  |

### 2b-3

Gibbs free energy before correction = -6384.05424900

Gibbs free energy after correction = -6384.04045865

|    |             |             |             |
|----|-------------|-------------|-------------|
| Ni | -0.36843600 | -0.12113000 | 0.02605700  |
| Br | 0.78781300  | -0.48678500 | -2.11191900 |
| C  | -2.44467000 | -1.89726300 | -1.24782000 |
| C  | -3.17940600 | -3.21301800 | -1.45021700 |
| C  | -3.98374100 | -3.57867500 | -0.20894800 |
| C  | -3.08138900 | -3.58718800 | 1.01868400  |
| C  | -2.34661500 | -2.26211300 | 1.15813300  |
| H  | -3.82726200 | -3.14219000 | -2.33565600 |
| H  | -3.16997700 | -1.07511700 | -1.12419500 |
| H  | -1.80318100 | -1.64826800 | -2.10314600 |
| H  | -4.78487900 | -2.83378300 | -0.06452900 |
| H  | -4.47713100 | -4.55239100 | -0.33529300 |
| H  | -3.65785800 | -3.78693700 | 1.93324200  |
| H  | -2.33873500 | -4.39741300 | 0.92494600  |
| H  | -3.06690400 | -1.44863400 | 1.34345200  |
| H  | -1.65538100 | -2.28508600 | 2.01177400  |
| H  | -2.44081300 | -4.00584700 | -1.65782200 |
| N  | -1.58464700 | -1.89904000 | -0.04945800 |
| H  | -0.85621300 | -2.60564900 | -0.18814600 |
| C  | -0.71459500 | 2.72406400  | -0.95017700 |
| C  | -1.47797100 | 3.74888900  | -1.77458300 |
| C  | -2.82625000 | 4.06127100  | -1.13515700 |
| C  | -3.61422800 | 2.77808600  | -0.89725200 |
| C  | -2.78780700 | 1.78715000  | -0.09311900 |
| H  | -0.87350600 | 4.66035200  | -1.88611200 |

|    |             |             |             |
|----|-------------|-------------|-------------|
| H  | -0.47753100 | 3.13873900  | 0.04342900  |
| H  | 0.23281300  | 2.43809700  | -1.42574900 |
| H  | -2.65855700 | 4.56420700  | -0.16750200 |
| H  | -3.40065500 | 4.75976900  | -1.75924200 |
| H  | -4.55798900 | 2.98558700  | -0.37335600 |
| H  | -3.87865100 | 2.31920700  | -1.86497700 |
| H  | -2.57079800 | 2.19551400  | 0.90557800  |
| H  | -3.32012200 | 0.83664600  | 0.05490600  |
| H  | -1.63415800 | 3.34365100  | -2.78876800 |
| N  | -1.49167300 | 1.49116900  | -0.72933800 |
| H  | -1.68223300 | 1.08454800  | -1.65064100 |
| C  | 1.18641200  | -0.89090600 | 1.47347800  |
| C  | 0.82693800  | 0.46723100  | 1.61329400  |
| C  | 1.71049700  | 1.50721100  | 1.25772700  |
| C  | 2.90657000  | 1.18002200  | 0.66231100  |
| C  | 3.25057100  | -0.16932300 | 0.45908900  |
| C  | 2.41943000  | -1.18911300 | 0.87112800  |
| H  | 0.59719900  | -1.68459700 | 1.92901200  |
| H  | 1.44015600  | 2.54523300  | 1.43927100  |
| H  | 3.59088100  | 1.96683700  | 0.34766400  |
| H  | 2.70426400  | -2.22934500 | 0.73432600  |
| Br | -0.69499700 | 0.87180200  | 2.72588000  |
| C  | 4.54894800  | -0.45411800 | -0.21534100 |
| F  | 4.76512700  | -1.76057500 | -0.40227200 |
| F  | 5.59116600  | 0.02018800  | 0.49270700  |
| F  | 4.62292200  | 0.13535800  | -1.41893600 |

#### 2b-4

Gibbs free energy before correction = -6384.05389200

Gibbs free energy after correction = -6384.04010165

|    |             |             |             |
|----|-------------|-------------|-------------|
| Ni | -0.42259200 | 0.11322700  | -0.03807800 |
| Br | 0.75959200  | 0.04633800  | -2.20198700 |
| C  | -3.30332300 | -0.75281800 | -0.59635000 |
| C  | -4.30443200 | -1.57321500 | -1.39621300 |
| C  | -4.11845800 | -3.06178200 | -1.12885800 |
| C  | -2.67608900 | -3.46921100 | -1.40314000 |
| C  | -1.71687300 | -2.60781900 | -0.59739600 |
| H  | -5.32607000 | -1.25034200 | -1.15060500 |
| H  | -3.50099500 | -0.86022900 | 0.48269000  |
| H  | -3.38294000 | 0.31584200  | -0.84036600 |
| H  | -4.35858100 | -3.27270000 | -0.07262700 |
| H  | -4.81440800 | -3.65585100 | -1.73707600 |
| H  | -2.51101200 | -4.52916600 | -1.16310100 |
| H  | -2.45446500 | -3.34523300 | -2.47660200 |

|    |             |             |             |
|----|-------------|-------------|-------------|
| H  | -1.86624400 | -2.78342500 | 0.48021300  |
| H  | -0.66845900 | -2.84203500 | -0.82867300 |
| H  | -4.15259000 | -1.36988500 | -2.46965700 |
| N  | -1.90991700 | -1.16670000 | -0.83052900 |
| H  | -1.68200400 | -0.98255600 | -1.81273000 |
| C  | -0.06613200 | 3.10572200  | -0.46029800 |
| C  | -0.60790000 | 4.48952400  | -0.78156900 |
| C  | -1.55307700 | 4.96667000  | 0.31495200  |
| C  | -2.65278900 | 3.93832800  | 0.55108700  |
| C  | -2.05638100 | 2.56713500  | 0.83237400  |
| H  | 0.22736400  | 5.19178000  | -0.91561200 |
| H  | 0.54327200  | 3.14405000  | 0.45736000  |
| H  | 0.56962100  | 2.70869500  | -1.26229700 |
| H  | -0.98197800 | 5.10522200  | 1.24872500  |
| H  | -1.98443100 | 5.94473800  | 0.06057700  |
| H  | -3.30253700 | 4.23704800  | 1.38602100  |
| H  | -3.29328300 | 3.86975700  | -0.34455900 |
| H  | -1.47876600 | 2.59369200  | 1.77116900  |
| H  | -2.84171200 | 1.80822800  | 0.95427900  |
| H  | -1.14794300 | 4.44909100  | -1.74274000 |
| N  | -1.13653500 | 2.11803800  | -0.22792600 |
| H  | -1.67147000 | 2.03570600  | -1.09773800 |
| C  | 1.14015200  | 0.46917300  | 1.48345900  |
| C  | 0.54206700  | -0.81193400 | 1.55257800  |
| C  | 1.24425900  | -1.97419100 | 1.17719300  |
| C  | 2.49709400  | -1.84078100 | 0.61944400  |
| C  | 3.07513700  | -0.56764800 | 0.47852200  |
| C  | 2.42334900  | 0.56587400  | 0.92343400  |
| H  | 0.69420400  | 1.32796000  | 1.98303600  |
| H  | 0.79496300  | -2.95617400 | 1.30857400  |
| H  | 3.03600300  | -2.72567900 | 0.28973500  |
| H  | 2.89948600  | 1.54294000  | 0.84610000  |
| Br | -1.05479800 | -0.97241100 | 2.61930400  |
| C  | 4.43682000  | -0.40851500 | -0.11162600 |
| F  | 5.35559400  | -0.09668000 | 0.82207300  |
| F  | 4.47897400  | 0.58033300  | -1.01608600 |
| F  | 4.86814200  | -1.51984600 | -0.72047600 |

**S8a**

Gibbs free energy before correction = -7017.92847700

Gibbs free energy after correction = -7017.91468675

|    |             |            |            |
|----|-------------|------------|------------|
| Ni | -2.14570500 | 0.01843200 | 0.51201300 |
| C  | 0.12702500  | 1.53406900 | 1.47128900 |
| C  | -0.62532800 | 1.14600200 | 0.34957300 |

|   |             |             |             |
|---|-------------|-------------|-------------|
| C | -0.14462600 | 1.53207700  | -0.91469800 |
| C | 1.06497000  | 2.21816400  | -1.05807000 |
| C | 1.80084400  | 2.55527900  | 0.07076300  |
| C | 1.32343000  | 2.22533900  | 1.34096100  |
| H | -0.21512300 | 1.26719000  | 2.47204000  |
| H | -0.70415000 | 1.28236700  | -1.81685100 |
| H | 1.43114400  | 2.47640700  | -2.05144700 |
| H | 1.89800100  | 2.49497600  | 2.22564500  |
| C | 3.15299900  | 3.16090900  | -0.09694600 |
| F | 3.58366000  | 3.77944100  | 1.00942100  |
| F | 3.18727800  | 4.05866600  | -1.09295100 |
| F | 4.07518600  | 2.22693100  | -0.39922600 |
| C | -3.32429100 | 2.12252300  | -1.21912600 |
| C | -4.52154300 | 3.04039700  | -1.40345800 |
| C | -4.56197100 | 4.10179400  | -0.31035000 |
| C | -4.52726500 | 3.45301000  | 1.06817000  |
| C | -3.33552800 | 2.51961400  | 1.19650300  |
| H | -4.47169000 | 3.49952600  | -2.39991500 |
| H | -2.38953500 | 2.69180300  | -1.29844400 |
| H | -3.29919500 | 1.32320800  | -1.97141000 |
| H | -3.68859500 | 4.76564700  | -0.41933200 |
| H | -5.45510900 | 4.73170400  | -0.41719400 |
| H | -4.47889200 | 4.21011200  | 1.86250800  |
| H | -5.45305900 | 2.87591900  | 1.23311700  |
| H | -2.39009900 | 3.07173300  | 1.10606200  |
| H | -3.32723200 | 1.99721200  | 2.16269900  |
| H | -5.44532200 | 2.43754900  | -1.37526100 |
| N | -3.34707300 | 1.49126400  | 0.12281400  |
| H | -4.26276000 | 1.03830600  | 0.19016900  |
| C | -4.44960700 | -1.40795200 | -0.72904900 |
| C | -5.44476700 | -2.55600500 | -0.68679800 |
| C | -6.38386700 | -2.41375100 | 0.50438400  |
| C | -5.58635100 | -2.29932300 | 1.79749700  |
| C | -4.58313200 | -1.16055400 | 1.71354900  |
| H | -6.00361700 | -2.58728900 | -1.63208900 |
| H | -4.98600600 | -0.46061900 | -0.90070600 |
| H | -3.71251800 | -1.53048100 | -1.53369500 |
| H | -6.99819300 | -1.50688100 | 0.37493100  |
| H | -7.07891300 | -3.26279100 | 0.55307900  |
| H | -6.24710800 | -2.13844400 | 2.66006300  |
| H | -5.04138000 | -3.24001000 | 1.98135500  |
| H | -5.11538600 | -0.19898800 | 1.63022300  |
| H | -3.95068500 | -1.10806200 | 2.61029400  |
| H | -4.88888700 | -3.50538100 | -0.61119300 |

|    |             |             |             |
|----|-------------|-------------|-------------|
| N  | -3.69107600 | -1.29161800 | 0.53881200  |
| H  | -3.19100200 | -2.17925400 | 0.64856000  |
| Br | -0.77667000 | -1.67547300 | 1.46265700  |
| C  | 3.05624600  | -1.25175900 | 0.95377500  |
| C  | 2.55292100  | -1.12293300 | -0.35113300 |
| C  | 3.48999000  | -0.98671700 | -1.38497600 |
| C  | 4.86276500  | -0.98738500 | -1.14373200 |
| C  | 5.32390800  | -1.11729600 | 0.16227000  |
| C  | 4.42059500  | -1.24811900 | 1.21731700  |
| H  | 2.36413300  | -1.35522800 | 1.79334900  |
| H  | 3.14973000  | -0.87160600 | -2.41734400 |
| H  | 5.56835200  | -0.88388700 | -1.96624800 |
| H  | 4.79110600  | -1.34704500 | 2.23844500  |
| Br | -0.95090500 | -1.67588600 | -2.42933600 |
| C  | 6.78057900  | -1.13211100 | 0.48164300  |
| F  | 7.15542900  | -2.29398600 | 1.04715100  |
| F  | 7.10849100  | -0.17116200 | 1.36348100  |
| F  | 7.55642400  | -0.95533400 | -0.59402300 |
| Zn | 0.55325700  | -0.99854700 | -0.67487400 |

### T8a

Gibbs free energy before correction = -7017.92443600

Gibbs free energy after correction = -7017.91064575

|    |            |             |             |
|----|------------|-------------|-------------|
| Ni | 1.34357400 | -0.83829200 | -0.14139400 |
| C  | 1.19852300 | 1.77658400  | -1.48381200 |
| C  | 0.82595900 | 1.20713500  | -0.25322400 |
| C  | 0.82334600 | 2.06317600  | 0.86709100  |
| C  | 1.20042900 | 3.39677600  | 0.77547700  |
| C  | 1.59837300 | 3.91104800  | -0.45966000 |
| C  | 1.60237600 | 3.10610800  | -1.59384300 |
| H  | 1.17501100 | 1.16183400  | -2.38679200 |
| H  | 0.51273100 | 1.67461700  | 1.83993000  |
| H  | 1.18636500 | 4.04253500  | 1.65363500  |
| H  | 1.90336800 | 3.51562900  | -2.55615700 |
| C  | 2.02911200 | 5.34094600  | -0.51809300 |
| F  | 2.25675600 | 5.76599700  | -1.76466700 |
| F  | 3.15992900 | 5.54238000  | 0.17990000  |
| F  | 1.10759900 | 6.15720000  | 0.01714400  |
| C  | 3.09517800 | -0.18251200 | 2.31180600  |
| C  | 4.48635200 | -0.14281900 | 2.92281100  |
| C  | 5.37136600 | 0.86680200  | 2.20211600  |
| C  | 5.39691200 | 0.57974300  | 0.70549700  |
| C  | 3.98324200 | 0.53788500  | 0.14945200  |
| H  | 4.40761400 | 0.09148900  | 3.99345900  |

|    |             |             |             |
|----|-------------|-------------|-------------|
| H  | 2.58327000  | 0.78170200  | 2.44419900  |
| H  | 2.46783100  | -0.95396900 | 2.77530700  |
| H  | 4.97170200  | 1.88150000  | 2.36728600  |
| H  | 6.38863200  | 0.85524300  | 2.61621300  |
| H  | 5.97979400  | 1.33864100  | 0.16564900  |
| H  | 5.88538800  | -0.39221400 | 0.51993000  |
| H  | 3.49684100  | 1.51689400  | 0.26364900  |
| H  | 3.97206000  | 0.28640000  | -0.92150000 |
| H  | 4.93538300  | -1.14822000 | 2.84835000  |
| N  | 3.14546300  | -0.45283100 | 0.86033200  |
| H  | 3.62160200  | -1.35285900 | 0.75510400  |
| C  | 2.39164700  | -3.68420900 | 0.61269800  |
| C  | 2.66745700  | -5.10768500 | 0.15562800  |
| C  | 3.73146100  | -5.13381900 | -0.93498500 |
| C  | 3.33468100  | -4.21926400 | -2.08774500 |
| C  | 3.04453600  | -2.81610900 | -1.58062600 |
| H  | 2.96907500  | -5.71661500 | 1.01898700  |
| H  | 3.29104700  | -3.26559600 | 1.09402000  |
| H  | 1.57672200  | -3.63809400 | 1.34525500  |
| H  | 4.69114000  | -4.78933800 | -0.51419800 |
| H  | 3.89324800  | -6.15944100 | -1.29342600 |
| H  | 4.12317900  | -4.17798100 | -2.85177800 |
| H  | 2.42956100  | -4.61221100 | -2.58065300 |
| H  | 3.96145100  | -2.37138300 | -1.16011300 |
| H  | 2.69821400  | -2.15572000 | -2.38865000 |
| H  | 1.73065900  | -5.54208900 | -0.23136600 |
| N  | 2.01879400  | -2.80715600 | -0.51590100 |
| H  | 1.15586400  | -3.18778100 | -0.91785200 |
| Br | -0.34134000 | -1.37258500 | -2.15167500 |
| C  | -3.78602500 | -0.69548300 | 0.81318800  |
| C  | -3.18901900 | 0.28084500  | -0.00111300 |
| C  | -4.04923100 | 1.16938500  | -0.66216800 |
| C  | -5.43427800 | 1.09848800  | -0.52447100 |
| C  | -5.98955400 | 0.11691600  | 0.29004200  |
| C  | -5.16507800 | -0.78677300 | 0.96024000  |
| H  | -3.15333600 | -1.40582900 | 1.35095000  |
| H  | -3.64059300 | 1.94680700  | -1.31069600 |
| H  | -6.07766500 | 1.80337000  | -1.04838800 |
| H  | -5.60713400 | -1.55582400 | 1.59470100  |
| Br | -0.23196600 | -1.50577700 | 1.67065800  |
| C  | -7.46639100 | -0.02646900 | 0.43837100  |
| F  | -7.83565500 | -0.12112600 | 1.72745500  |
| F  | -7.92272300 | -1.14343000 | -0.15837200 |
| F  | -8.14664300 | 0.99895700  | -0.08888500 |

|    |             |            |             |
|----|-------------|------------|-------------|
| Zn | -1.16715900 | 0.26077600 | -0.26475700 |
|----|-------------|------------|-------------|

### **<sup>s</sup>TS4a**

Gibbs free energy before correction = -7017.88806200

Gibbs free energy after correction = -7017.87427175

|    |            |             |             |
|----|------------|-------------|-------------|
| Ni | 1.06667700 | -1.04239900 | -0.09745800 |
| C  | 1.19773000 | 1.74823200  | -1.46506800 |
| C  | 0.58233300 | 1.63625600  | -0.20658000 |
| C  | 1.09922500 | 2.45440400  | 0.81850400  |
| C  | 2.18228600 | 3.30006700  | 0.61908000  |
| C  | 2.78902600 | 3.34835100  | -0.63828000 |
| C  | 2.29171200 | 2.58466000  | -1.68860800 |
| H  | 0.82129000 | 1.15257000  | -2.29910000 |
| H  | 0.64664100 | 2.42740400  | 1.81366700  |
| H  | 2.57322800 | 3.90839100  | 1.43507000  |
| H  | 2.76394100 | 2.62635900  | -2.66893200 |
| C  | 4.06454500 | 4.10637700  | -0.78174400 |
| F  | 4.38939300 | 4.35003800  | -2.05614100 |
| F  | 5.09303500 | 3.41698000  | -0.24410800 |
| F  | 4.03462900 | 5.28700400  | -0.14666300 |
| C  | 2.57951200 | -0.34757300 | 2.36508000  |
| C  | 3.93997000 | -0.34327100 | 3.04442400  |
| C  | 4.96155800 | 0.46750200  | 2.25964800  |
| C  | 5.04093700 | -0.04947100 | 0.83082900  |
| C  | 3.66274300 | -0.03024700 | 0.19318700  |
| H  | 3.81600700 | 0.04770000  | 4.06349200  |
| H  | 2.15525000 | 0.66338200  | 2.32118000  |
| H  | 1.86472000 | -0.98604300 | 2.89115000  |
| H  | 4.65943400 | 1.52899100  | 2.23940300  |
| H  | 5.94529100 | 0.42429700  | 2.74605200  |
| H  | 5.71393600 | 0.56681200  | 0.21877300  |
| H  | 5.44126600 | -1.07709800 | 0.81979500  |
| H  | 3.27958400 | 0.99496600  | 0.17508800  |
| H  | 3.68656400 | -0.39920000 | -0.83884800 |
| H  | 4.29402800 | -1.38300900 | 3.14427700  |
| N  | 2.67864700 | -0.83829400 | 0.96408300  |
| H  | 3.06124900 | -1.78585900 | 1.03633700  |
| C  | 1.40272800 | -3.85561400 | 0.16714800  |
| C  | 1.56134400 | -5.23647500 | -0.44787700 |
| C  | 2.95774700 | -5.41666400 | -1.02735400 |
| C  | 3.26095700 | -4.30671400 | -2.02449800 |
| C  | 3.08790100 | -2.93741200 | -1.38449000 |
| H  | 1.34414500 | -5.99309200 | 0.31795000  |
| H  | 2.07531800 | -3.73866200 | 1.03057800  |

|    |             |             |             |
|----|-------------|-------------|-------------|
| H  | 0.37875700  | -3.67618500 | 0.51862600  |
| H  | 3.69841200  | -5.38631900 | -0.21102000 |
| H  | 3.05250500  | -6.40002100 | -1.50666300 |
| H  | 4.28404800  | -4.38739000 | -2.41538300 |
| H  | 2.57946000  | -4.38430800 | -2.88746300 |
| H  | 3.82491100  | -2.80906100 | -0.57843800 |
| H  | 3.23191200  | -2.13312700 | -2.11654300 |
| H  | 0.80849400  | -5.35963200 | -1.24395900 |
| N  | 1.72909800  | -2.78871500 | -0.81368600 |
| H  | 1.08326700  | -2.91576400 | -1.59905600 |
| Br | -0.66349200 | -1.20675300 | -1.70624500 |
| C  | -4.06151100 | -0.21849000 | 0.72567900  |
| C  | -3.32093100 | 0.82501400  | 0.14428000  |
| C  | -4.05522000 | 1.82933900  | -0.50368200 |
| C  | -5.44760900 | 1.80768500  | -0.57518600 |
| C  | -6.14299600 | 0.75549300  | 0.01116200  |
| C  | -5.44905000 | -0.26360000 | 0.66570000  |
| H  | -3.53064000 | -1.02276200 | 1.24254400  |
| H  | -3.53596500 | 2.66555100  | -0.97790200 |
| H  | -5.98761600 | 2.60381100  | -1.08526900 |
| H  | -6.00121100 | -1.08620200 | 1.12306500  |
| Br | -0.64742800 | -1.16054700 | 1.89727500  |
| C  | -7.63045500 | 0.67863500  | -0.03644900 |
| F  | -8.17486200 | 0.68349600  | 1.19469500  |
| F  | -8.05472500 | -0.45778400 | -0.61897500 |
| F  | -8.18698900 | 1.69237400  | -0.71071700 |
| Zn | -1.26994700 | 0.75924500  | 0.17097500  |

#### **<sup>†</sup>TS4a**

Gibbs free energy before correction = -7017.91668000

Gibbs free energy after correction = -7017.90288975

|    |             |             |             |
|----|-------------|-------------|-------------|
| Ni | -0.90468500 | 1.01521800  | -0.16342900 |
| C  | -1.39832200 | -1.95618000 | -1.34516000 |
| C  | -0.83135200 | -1.70686700 | -0.08331600 |
| C  | -1.49109100 | -2.27533300 | 1.02317200  |
| C  | -2.65638000 | -3.02142900 | 0.88907900  |
| C  | -3.19135700 | -3.23266500 | -0.38270200 |
| C  | -2.56141800 | -2.70670600 | -1.50642500 |
| H  | -0.92345300 | -1.53517000 | -2.23381400 |
| H  | -1.08906600 | -2.12984300 | 2.02910700  |
| H  | -3.15650600 | -3.43412600 | 1.76544700  |
| H  | -2.98208900 | -2.86923200 | -2.49755700 |
| C  | -4.51863400 | -3.90244700 | -0.50022900 |
| F  | -4.76626100 | -4.35655400 | -1.73408700 |



|    |             |             |             |
|----|-------------|-------------|-------------|
| F  | -5.51811900 | -3.04948100 | -0.19452800 |
| F  | -4.64523100 | -4.94134400 | 0.33797800  |
| C  | -2.99100200 | 0.76868900  | 2.05445400  |
| C  | -4.42329900 | 1.01861100  | 2.49657800  |
| C  | -5.41263800 | 0.27108500  | 1.61107000  |
| C  | -5.19699200 | 0.64069300  | 0.14870600  |
| C  | -3.75547400 | 0.37671600  | -0.24698500 |
| H  | -4.53126500 | 0.72379500  | 3.54933100  |
| H  | -2.71737600 | -0.28780900 | 2.18173600  |
| H  | -2.27741600 | 1.36644400  | 2.63410600  |
| H  | -5.26142000 | -0.81550800 | 1.73130900  |
| H  | -6.44537000 | 0.48501100  | 1.91784100  |
| H  | -5.86053600 | 0.06236100  | -0.50915800 |
| H  | -5.43227200 | 1.70665500  | -0.00982200 |
| H  | -3.53391400 | -0.69358100 | -0.15645200 |
| H  | -3.54917800 | 0.67223600  | -1.28722600 |
| H  | -4.62848200 | 2.10173500  | 2.44649500  |
| N  | -2.79617300 | 1.09740900  | 0.62463000  |
| H  | -3.02215900 | 2.09168600  | 0.53058600  |
| C  | -1.12536900 | 3.98029800  | 0.67516800  |
| C  | -0.85501200 | 5.43485000  | 0.32487700  |
| C  | -1.66628800 | 5.86124700  | -0.89223300 |
| C  | -1.40218900 | 4.92139400  | -2.06186700 |
| C  | -1.65633500 | 3.47716000  | -1.66091200 |
| H  | -1.08343700 | 6.06498100  | 1.19527400  |
| H  | -2.17900600 | 3.85961400  | 0.97322200  |
| H  | -0.50170500 | 3.63669800  | 1.50860000  |
| H  | -2.73973000 | 5.83402500  | -0.64049800 |
| H  | -1.43180600 | 6.89802000  | -1.16891000 |
| H  | -2.03154900 | 5.17427000  | -2.92603200 |
| H  | -0.35344200 | 5.01892500  | -2.38878800 |
| H  | -2.71927100 | 3.33292000  | -1.40975900 |
| H  | -1.40733900 | 2.78303100  | -2.47416900 |
| H  | 0.22075500  | 5.55513600  | 0.11516300  |
| N  | -0.86476700 | 3.08622200  | -0.47373200 |
| H  | 0.12724600  | 3.18532300  | -0.71394700 |
| Br | 0.74037000  | 0.77272900  | -1.98461600 |
| C  | 3.90837700  | -0.08328900 | 0.80293200  |
| C  | 3.19256700  | -1.14098200 | 0.21626600  |
| C  | 3.95234800  | -2.14824700 | -0.39682800 |
| C  | 5.34585900  | -2.11415000 | -0.43296600 |
| C  | 6.01648900  | -1.04750600 | 0.15572500  |
| C  | 5.29638600  | -0.02723200 | 0.77883300  |
| H  | 3.35977100  | 0.72491400  | 1.29302900  |

|    |            |             |             |
|----|------------|-------------|-------------|
| H  | 3.45363700 | -2.99568600 | -0.87256500 |
| H  | 5.90553000 | -2.91179400 | -0.91879300 |
| H  | 5.82823700 | 0.80664400  | 1.23949200  |
| Br | 0.54651900 | 1.06476900  | 1.80671500  |
| C  | 7.50392600 | -0.95562500 | 0.14530900  |
| F  | 8.01714000 | -0.95194400 | 1.38976300  |
| F  | 7.93073600 | 0.18369100  | -0.42941100 |
| F  | 8.08705800 | -1.96530900 | -0.51208400 |
| Zn | 1.14781800 | -1.10998800 | 0.14163700  |

### **s9a**

Gibbs free energy before correction = -5815.76249700

Gibbs free energy after correction = -5815.74869360

|    |             |             |             |
|----|-------------|-------------|-------------|
| Ni | 0.00005700  | -0.61075200 | -0.00005000 |
| Br | -1.65062600 | -2.25499400 | -0.13173900 |
| Br | 1.65114400  | -2.25463100 | 0.13177400  |
| C  | 1.40503700  | 1.79251800  | 1.11404000  |
| C  | 2.76121700  | 2.46248400  | 1.26970000  |
| C  | 3.27486300  | 2.96108900  | -0.07492200 |
| C  | 3.31297300  | 1.81977100  | -1.08305200 |
| C  | 1.95115600  | 1.15327300  | -1.19691700 |
| H  | 2.67445800  | 3.28455400  | 1.99314300  |
| H  | 0.66315600  | 2.52472800  | 0.76950500  |
| H  | 1.05093500  | 1.37039100  | 2.06325700  |
| H  | 2.60439100  | 3.75324500  | -0.44826900 |
| H  | 4.26987000  | 3.41272800  | 0.03547500  |
| H  | 3.62416800  | 2.17448400  | -2.07502900 |
| H  | 4.05394700  | 1.06714600  | -0.76514000 |
| H  | 1.21227400  | 1.85796000  | -1.59870300 |
| H  | 1.98183000  | 0.28144600  | -1.86270300 |
| H  | 3.47327100  | 1.73529300  | 1.69389200  |
| N  | 1.46776300  | 0.69064500  | 0.12769300  |
| H  | 2.19106900  | 0.04966000  | 0.47233400  |
| C  | -1.40549200 | 1.79213300  | -1.11408400 |
| C  | -2.76176800 | 2.46192100  | -1.26968600 |
| C  | -3.27543600 | 2.96046200  | 0.07495100  |
| C  | -3.31336700 | 1.81912400  | 1.08306700  |
| C  | -1.95143600 | 1.15286600  | 1.19692100  |
| H  | -2.67513800 | 3.28399100  | -1.99314200 |
| H  | -0.66366300 | 2.52445400  | -0.76966200 |
| H  | -1.05141900 | 1.36999900  | -2.06331000 |
| H  | -2.60505300 | 3.75269500  | 0.44829500  |
| H  | -4.27050300 | 3.41197600  | -0.03541300 |
| H  | -3.62462900 | 2.17376300  | 2.07504900  |

|   |             |            |             |
|---|-------------|------------|-------------|
| H | -4.05419700 | 1.06636400 | 0.76513800  |
| H | -1.21267500 | 1.85769600 | 1.59867800  |
| H | -1.98195300 | 0.28103800 | 1.86270800  |
| H | -3.47374900 | 1.73463100 | -1.69383000 |
| N | -1.46798200 | 0.69032000 | -0.12767900 |
| H | -2.19106100 | 0.04908000 | -0.47230300 |

**T9a**

Gibbs free energy before correction = -5815.77436800

Gibbs free energy after correction = -5815.76057766

|    |             |             |             |
|----|-------------|-------------|-------------|
| Ni | -0.00010200 | -0.82399000 | 0.00069900  |
| Br | -0.04498600 | -1.76977700 | 2.17450500  |
| Br | 0.04371100  | -1.77431700 | -2.17151900 |
| C  | 1.55167000  | 1.38746700  | 1.17831600  |
| C  | 2.87124000  | 2.10949900  | 1.39250600  |
| C  | 3.37682800  | 2.71425800  | 0.08902100  |
| C  | 3.46168400  | 1.64265000  | -0.99024600 |
| C  | 2.13062900  | 0.92982300  | -1.15706300 |
| H  | 2.73927600  | 2.88019900  | 2.16425700  |
| H  | 0.77317000  | 2.09616600  | 0.85642600  |
| H  | 1.20054500  | 0.89256700  | 2.09184400  |
| H  | 2.68074800  | 3.50453400  | -0.23819500 |
| H  | 4.35411800  | 3.19320700  | 0.23740100  |
| H  | 3.76222800  | 2.07280800  | -1.95548100 |
| H  | 4.23161100  | 0.90189000  | -0.71738400 |
| H  | 1.35579600  | 1.63003400  | -1.50251000 |
| H  | 2.18511000  | 0.11609000  | -1.88849800 |
| H  | 3.61179400  | 1.39103600  | 1.78173000  |
| N  | 1.65079400  | 0.35421100  | 0.12151500  |
| H  | 2.35559100  | -0.32696300 | 0.42809200  |
| C  | -1.55069000 | 1.38564100  | -1.18053800 |
| C  | -2.87014700 | 2.10732000  | -1.39656700 |
| C  | -3.37567700 | 2.71542500  | -0.09461000 |
| C  | -3.46054300 | 1.64668300  | 0.98750800  |
| C  | -2.12962900 | 0.93395400  | 1.15592100  |
| H  | -2.73806200 | 2.87609500  | -2.17021000 |
| H  | -0.77207500 | 2.09492500  | -0.86018400 |
| H  | -1.19959400 | 0.88834900  | -2.09276600 |
| H  | -2.67957700 | 3.50655100  | 0.23048800  |
| H  | -4.35297000 | 3.19400300  | -0.24418700 |
| H  | -3.76075900 | 2.07952000  | 1.95164500  |
| H  | -4.23072700 | 0.90539400  | 0.71682300  |
| H  | -1.35451800 | 1.63487500  | 1.49930900  |
| H  | -2.18410300 | 0.12222000  | 1.88958300  |

|   |             |             |             |
|---|-------------|-------------|-------------|
| H | -3.61076400 | 1.38798800  | -1.78405200 |
| N | -1.65024000 | 0.35490400  | -0.12115500 |
| H | -2.35541200 | -0.32659600 | -0.42620900 |
